# Supplementary material for: Transcriptome profiling of flax plants exposed to a low-frequency alternating electromagnetic field
Source: Frontiers journal article supplement (doi:10.3389/fgene.2023.1205469), 2023-06-07
Supplement: Data_Sheet_1.zip [file Data_Sheet_1.zip]

## Sheet: 9vs10
Unnamed: 0	baseMean	log2FoldChange	lfcSE	stat	pvalue	padj	change	Description
Lus10021394.g.BGIv1.0	32.3726	8.45864	1.21683	6.95136	3.61788e-12	9.277e-11	up	PTHR31642:SF57 - SPERMIDINE HYDROXYCINNAMOYL TRANSFERASE (1 of 5)
Lus10001032.g.BGIv1.0	29.9792	8.34872	1.22322	6.8252	8.78016e-12	2.1706e-10	up	PF10604 - Polyketide cyclase / dehydrase and lipid transport (Polyketide_cyc2) (1 of 26)
Lus10021196.g.BGIv1.0	13.6254	7.20547	1.27033	5.67211	1.41047e-08	2.32859e-07	up	PTHR31190:SF26 - ETHYLENE-RESPONSIVE TRANSCRIPTION FACTOR ERF096 (1 of 4)
Lus10033781.g.BGIv1.0	18.1965	6.65064	1.24482	5.34266	9.15905e-08	1.33855e-06	up	PTHR27007:SF24 - L-TYPE LECTIN-DOMAIN CONTAINING RECEPTOR KINASE IX.1-RELATED (1 of 23)
Lus10001036.g.BGIv1.0	7.69818	6.39059	1.37042	4.66323	3.11289e-06	3.48753e-05	up	PF13952 - Domain of unknown function (DUF4216) (DUF4216) (1 of 1)
Lus10031238.g.BGIv1.0	6.54448	6.1521	1.36075	4.52111	6.15153e-06	6.44169e-05	up	1.13.11.12 - Linoleate 13S-lipoxygenase / Lipoxidase (1 of 18)
Lus10001037.g.BGIv1.0	5.84237	5.98234	1.38121	4.33124	1.48269e-05	0.000142504	up	PTHR31907:SF1 - MLP-LIKE PROTEIN 423-RELATED (1 of 14)
Lus10014241.g.BGIv1.0	5.79355	5.97269	1.37674	4.33827	1.43608e-05	0.000138538	up	?
Lus10032794.g.BGIv1.0	10.4502	5.84479	1.29251	4.52204	6.12473e-06	6.41679e-05	up	K01183 - chitinase (E3.2.1.14) (1 of 29)
Lus10009898.g.BGIv1.0	99.9994	5.74779	0.470306	12.2214	2.38976e-34	2.54393e-32	up	PTHR31388:SF37 - PEROXIDASE 4-RELATED (1 of 10)
Lus10025989.g.BGIv1.0	4.81572	5.70534	1.42703	3.99805	6.38652e-05	0.000530838	up	PTHR23070//PTHR23070:SF24 - BCS1 AAA-TYPE ATPASE // SUBFAMILY NOT NAMED (1 of 2)
Lus10016839.g.BGIv1.0	26.3197	5.69363	0.895998	6.35451	2.09089e-10	4.45437e-09	up	PF00407 - Pathogenesis-related protein Bet v I family (Bet_v_1) (1 of 55)
Lus10003587.g.BGIv1.0	4.30989	5.5455	1.44044	3.84986	0.000118187	0.000916393	up	3.2.1.14 - Chitinase / Poly-beta-glucosaminidase (1 of 64)
Lus10003450.g.BGIv1.0	8.52958	5.54277	1.31237	4.22348	2.40556e-05	0.000220766	up	?
Lus10039163.g.BGIv1.0	147.74	5.51956	0.984539	5.60623	2.0678e-08	3.31014e-07	up	PF00197 - Trypsin and protease inhibitor (Kunitz_legume) (1 of 21)
Lus10042804.g.BGIv1.0	8.21718	5.4899	1.32092	4.15612	3.23697e-05	0.000288972	up	KOG4473 - Uncharacterized membrane protein (1 of 14)
Lus10001846.g.BGIv1.0	7.94793	5.43862	1.32929	4.09137	4.28828e-05	0.000372863	up	PTHR31086:SF22 - ALUMINUM-ACTIVATED MALATE TRANSPORTER 1-RELATED (1 of 3)
Lus10013770.g.BGIv1.0	13.9578	5.35031	1.12047	4.77504	1.79667e-06	2.10006e-05	up	PF00197 - Trypsin and protease inhibitor (Kunitz_legume) (1 of 21)
Lus10031237.g.BGIv1.0	33.8478	5.30897	0.713095	7.44496	9.69705e-14	2.94799e-12	up	1.13.11.12 - Linoleate 13S-lipoxygenase / Lipoxidase (1 of 18)
Lus10018646.g.BGIv1.0	7.18752	5.29148	1.34473	3.93496	8.32103e-05	0.000674497	up	?
Lus10030902.g.BGIv1.0	3.60345	5.29053	1.49678	3.53461	0.000408382	0.00273158	up	K02575 - MFS transporter, NNP family, nitrate/nitrite transporter (NRT, narK, nrtP, nasA) (1 of 4)
Lus10043313.g.BGIv1.0	52.5395	5.26483	0.563484	9.34336	9.33276e-21	5.01487e-19	up	PTHR24298:SF86 - CYTOCHROME P450 71B21-RELATED (1 of 14)
Lus10012065.g.BGIv1.0	12.7616	5.2199	1.12995	4.61957	3.84543e-06	4.22723e-05	up	?
Lus10031239.g.BGIv1.0	37.8007	5.20557	0.654897	7.94869	1.88495e-15	6.70261e-14	up	1.13.11.12 - Linoleate 13S-lipoxygenase / Lipoxidase (1 of 18)
Lus10013231.g.BGIv1.0	3.346	5.17756	1.52321	3.39912	0.000676033	0.00425452	up	PF02458 - Transferase family (Transferase) (1 of 177)
Lus10040354.g.BGIv1.0	3.30792	5.16475	1.53093	3.37361	0.000741888	0.00461305	up	2.3.1.84 - Alcohol O-acetyltransferase / AATASE (1 of 62)
Lus10018784.g.BGIv1.0	12.1302	5.14894	1.1303	4.55536	5.22965e-06	5.57934e-05	up	PF00280 - Potato inhibitor I family (potato_inhibit) (1 of 12)
Lus10004306.g.BGIv1.0	6.50426	5.14269	1.3743	3.74204	0.00018253	0.00134791	up	?
Lus10010956.g.BGIv1.0	3.191	5.10949	1.60058	3.19227	0.00141161	0.00803556	up	6.2.1.12 - 4-coumarate--CoA ligase / 4-coumaryl-CoA synthetase (1 of 9)
Lus10016060.g.BGIv1.0	3.1926	5.1087	1.53457	3.32907	0.000871365	0.00530188	up	PTHR22814:SF106 - HEAVY-METAL-ASSOCIATED DOMAIN-CONTAINING PROTEIN (1 of 9)
Lus10003448.g.BGIv1.0	5.96458	5.01087	1.36967	3.65846	0.000253739	0.00180718	up	?
Lus10002735.g.BGIv1.0	16.5855	5.00527	0.929751	5.38345	7.30711e-08	1.08291e-06	up	PF01117 - Aerolysin toxin (Aerolysin) (1 of 3)
Lus10019463.g.BGIv1.0	2.9555	5.00396	1.54335	3.24226	0.00118585	0.00692305	up	PTHR24298:SF86 - CYTOCHROME P450 71B21-RELATED (1 of 14)
Lus10033783.g.BGIv1.0	5.88906	4.99381	1.3984	3.57108	0.000355507	0.00242257	up	PTHR27007:SF24 - L-TYPE LECTIN-DOMAIN CONTAINING RECEPTOR KINASE IX.1-RELATED (1 of 23)
Lus10038369.g.BGIv1.0	2.83858	4.94088	1.56447	3.15819	0.00158754	0.00886799	up	3.2.1.15 - Polygalacturonase / Pectinase (1 of 79)
Lus10003339.g.BGIv1.0	2.80263	4.92614	1.56058	3.15661	0.00159613	0.0089042	up	PTHR22950//PTHR22950:SF299 - AMINO ACID TRANSPORTER // SUBFAMILY NOT NAMED (1 of 2)
Lus10005178.g.BGIv1.0	2.77849	4.91627	1.56376	3.14388	0.00166722	0.00924765	up	K00485 - dimethylaniline monooxygenase (N-oxide forming) (FMO) (1 of 5)
Lus10021311.g.BGIv1.0	2.71893	4.89052	1.61642	3.02552	0.00248204	0.0129915	up	1.1.1.295 - Momilactone-A synthase / Momilactone A synthase (1 of 1)
Lus10032827.g.BGIv1.0	5.48591	4.88974	1.3868	3.52591	0.000422024	0.00281113	up	PTHR15184:SF43 - ATP SYNTHASE SUBUNIT BETA, CHLOROPLASTIC (1 of 3)
Lus10035053.g.BGIv1.0	2.68571	4.85963	1.59218	3.05219	0.00227178	0.0120385	up	PTHR10696//PTHR10696:SF29 - GAMMA-BUTYROBETAINE HYDROXYLASE-RELATED // SUBFAMILY NOT NAMED (1 of 2)
Lus10011831.g.BGIv1.0	5.21126	4.82015	1.40242	3.43702	0.000588147	0.00377463	up	PTHR31190:SF26 - ETHYLENE-RESPONSIVE TRANSCRIPTION FACTOR ERF096 (1 of 4)
Lus10000835.g.BGIv1.0	5.16837	4.80028	1.40142	3.42531	0.000614102	0.00391705	up	PTHR36766:SF1 - HR3 (1 of 3)
Lus10036396.g.BGIv1.0	14.2111	4.76673	0.949125	5.02224	5.10718e-07	6.61835e-06	up	PTHR11751:SF284 - 1-AMINOCYCLOPROPANE-1-CARBOXYLATE SYNTHASE-LIKE PROTEIN 1 (1 of 2)
Lus10010443.g.BGIv1.0	2.4969	4.75669	1.60611	2.96163	0.0030602	0.0155218	up	PF07714//PF12819 - Protein tyrosine kinase (Pkinase_Tyr) // Carbohydrate-binding protein of the ER (Malectin_like) (1 of 11)
Lus10016424.g.BGIv1.0	27.7645	4.74189	0.679159	6.98201	2.90987e-12	7.53019e-11	up	2.7.11.1 - Non-specific serine/threonine protein kinase / Threonine-specific protein kinase (1 of 1714)
Lus10027770.g.BGIv1.0	2.46148	4.74007	1.63301	2.90266	0.00370003	0.0181849	up	2.4.1.228 - Lactosylceramide 4-alpha-galactosyltransferase / Histo-blood group P(k) UDP-galactose (1 of 5)
Lus10028542.g.BGIv1.0	2.46148	4.74007	1.63301	2.90266	0.00370003	0.0181849	up	PTHR11706//PTHR11706:SF38 - MANGANESE TRANSPORTER // SUBFAMILY NOT NAMED (1 of 2)
Lus10001033.g.BGIv1.0	2.45988	4.73982	1.62526	2.91634	0.00354161	0.0175366	up	PF10604 - Polyketide cyclase / dehydrase and lipid transport (Polyketide_cyc2) (1 of 26)
Lus10043084.g.BGIv1.0	9.16996	4.72649	1.16513	4.05662	4.97879e-05	0.000425879	up	PTHR31852:SF43 - LATE EMBRYOGENESIS ABUNDANT HYDROXYPROLINE-RICH GLYCOPROTEIN (1 of 6)
Lus10009427.g.BGIv1.0	2.38852	4.70532	1.65016	2.85143	0.00435236	0.0208237	up	PTHR24349//PTHR24349:SF117 - SERINE/THREONINE-PROTEIN KINASE // SUBFAMILY NOT NAMED (1 of 4)
Lus10029007.g.BGIv1.0	2.34076	4.67992	1.72569	2.71191	0.00668975	0.0296041	up	PF12796//PF13962 - Ankyrin repeats (3 copies) (Ank_2) // Domain of unknown function (PGG) (1 of 26)
Lus10016720.g.BGIv1.0	13.3446	4.67795	0.972189	4.81178	1.49595e-06	1.77749e-05	up	K15102 - solute carrier family 25 (mitochondrial phosphate transporter), member 3 (SLC25A3, PHC, PIC) (1 of 7)
Lus10040382.g.BGIv1.0	13.2748	4.67728	0.953431	4.90573	9.30799e-07	1.14509e-05	up	PTHR10209//PTHR10209:SF123 - OXIDOREDUCTASE, 2OG-FE II OXYGENASE FAMILY PROTEIN // SUBFAMILY NOT NAMED (1 of 8)
Lus10019690.g.BGIv1.0	2.3553	4.67046	1.68697	2.76855	0.0056307	0.0256733	up	KOG4083 - Head-elevated expression protein (1 of 2)
Lus10038126.g.BGIv1.0	4.73528	4.66872	1.45327	3.21257	0.00131552	0.00757503	up	K00485 - dimethylaniline monooxygenase (N-oxide forming) (FMO) (1 of 5)
Lus10030779.g.BGIv1.0	8.33113	4.61183	1.18644	3.88711	0.000101444	0.000802812	up	?
Lus10020706.g.BGIv1.0	2.23565	4.60923	1.6703	2.75952	0.00578861	0.0262761	up	PTHR18860//PTHR18860:SF31 - 14-3-3 PROTEIN // SUBFAMILY NOT NAMED (1 of 8)
Lus10007888.g.BGIv1.0	12.5673	4.59635	0.961443	4.78068	1.74701e-06	2.04769e-05	up	PF00197 - Trypsin and protease inhibitor (Kunitz_legume) (1 of 21)
Lus10021868.g.BGIv1.0	2.21204	4.59611	1.7065	2.6933	0.00707482	0.0310052	up	PTHR31189:SF1 - 12S SEED STORAGE PROTEIN CRA1-RELATED (1 of 10)
Lus10010338.g.BGIv1.0	4.42438	4.57406	1.42321	3.2139	0.00130947	0.00754577	up	K00423 - L-ascorbate oxidase (E1.10.3.3) (1 of 7)
Lus10000346.g.BGIv1.0	24.6233	4.56559	0.696215	6.55772	5.4637e-11	1.24157e-09	up	PF00141//PF00190 - Peroxidase (peroxidase) // Cupin (Cupin_1) (1 of 2)
Lus10011387.g.BGIv1.0	2.17989	4.55874	1.68441	2.70643	0.00680101	0.0300118	up	PF00560//PF07714//PF08263 - Leucine Rich Repeat (LRR_1) // Protein tyrosine kinase (Pkinase_Tyr) // Leucine rich repeat N-terminal domain (LRRNT_2) (1 of 10)
Lus10036097.g.BGIv1.0	2.15521	4.54554	1.66114	2.7364	0.00621159	0.0278367	up	?
Lus10018950.g.BGIv1.0	2.14234	4.53901	1.68035	2.70123	0.00690836	0.0304219	up	PTHR10209//PTHR10209:SF166 - OXIDOREDUCTASE, 2OG-FE II OXYGENASE FAMILY PROTEIN // SUBFAMILY NOT NAMED (1 of 5)
Lus10042315.g.BGIv1.0	2.14181	4.53895	1.71983	2.63919	0.00831046	0.0353997	up	PTHR31321:SF10 - PECTINESTERASE 11-RELATED (1 of 5)
Lus10001041.g.BGIv1.0	962.458	4.51312	0.109609	41.1749	0	0	up	PTHR31907:SF1 - MLP-LIKE PROTEIN 423-RELATED (1 of 14)
Lus10022642.g.BGIv1.0	19.5958	4.49907	0.760641	5.91484	3.32191e-09	5.99774e-08	up	PTHR22950//PTHR22950:SF299 - AMINO ACID TRANSPORTER // SUBFAMILY NOT NAMED (1 of 2)
Lus10016178.g.BGIv1.0	7.79453	4.49161	1.1893	3.77669	0.000158929	0.00119418	up	PF08659 - KR domain (KR) (1 of 39)
Lus10034229.g.BGIv1.0	54.6601	4.48908	0.450224	9.97076	2.04662e-23	1.26028e-21	up	4.2.3.19 - Ent-kaurene synthase / Ent-kaurene synthetase B (1 of 22)
Lus10031810.g.BGIv1.0	23.1957	4.48108	0.698357	6.4166	1.39348e-10	3.05146e-09	up	K00454 - lipoxygenase (LOX2S) (1 of 9)
Lus10019310.g.BGIv1.0	4.10631	4.46172	1.4438	3.09027	0.00199977	0.010811	up	?
Lus10006534.g.BGIv1.0	18.8962	4.44652	0.754886	5.89032	3.85456e-09	6.89307e-08	up	K00430 - peroxidase (E1.11.1.7) (1 of 94)
Lus10001042.g.BGIv1.0	605.761	4.43306	0.145691	30.4277	2.3612e-203	3.46429e-200	up	PTHR31907:SF1 - MLP-LIKE PROTEIN 423-RELATED (1 of 14)
Lus10024425.g.BGIv1.0	3.57581	4.25731	1.4777	2.88104	0.00396363	0.0192367	up	PF00892 - EamA-like transporter family (EamA) (1 of 81)
Lus10014084.g.BGIv1.0	9.91019	4.25726	1.00198	4.24887	2.14853e-05	0.000199401	up	PTHR11926:SF152 - UDP-GLUCOSYL TRANSFERASE 73B2-RELATED (1 of 7)
Lus10011185.g.BGIv1.0	3.59545	4.2534	1.4771	2.87956	0.00398227	0.0193081	up	PTHR10015//PTHR10015:SF155 - HEAT SHOCK TRANSCRIPTION FACTOR // SUBFAMILY NOT NAMED (1 of 2)
Lus10033633.g.BGIv1.0	157.1	4.24981	0.251332	16.9091	3.85565e-64	1.01648e-61	up	1.14.13.121 - Premnaspirodiene oxygenase / Hyoscymus muticus premnaspirodiene oxygenase (1 of 43)
Lus10025497.g.BGIv1.0	13.202	4.24619	0.884399	4.80121	1.57708e-06	1.866e-05	up	PTHR11017 - LEUCINE-RICH REPEAT-CONTAINING PROTEIN (1 of 197)
Lus10000474.g.BGIv1.0	152.608	4.2431	0.256321	16.5539	1.50149e-61	3.64517e-59	up	PTHR31907:SF1 - MLP-LIKE PROTEIN 423-RELATED (1 of 14)
Lus10009937.g.BGIv1.0	23.0077	4.23996	0.667797	6.34917	2.16476e-10	4.60012e-09	up	K00430 - peroxidase (E1.11.1.7) (1 of 94)
Lus10017231.g.BGIv1.0	3.49087	4.20278	1.48322	2.83355	0.00460337	0.0218237	up	PTHR21495:SF71 - DIRIGENT PROTEIN 1-RELATED (1 of 6)
Lus10024152.g.BGIv1.0	25.1454	4.16309	0.620204	6.71246	1.91376e-11	4.58339e-10	up	3.2.1.149//3.2.1.21 - Beta-glucosidase / Gentobiase (1 of 3)
Lus10039363.g.BGIv1.0	22.3993	4.1585	0.664161	6.26129	3.81818e-10	7.80875e-09	up	PF08263 - Leucine rich repeat N-terminal domain (LRRNT_2) (1 of 373)
Lus10018786.g.BGIv1.0	68.2384	4.13152	0.372821	11.0818	1.53804e-28	1.28151e-26	up	PF00280 - Potato inhibitor I family (potato_inhibit) (1 of 12)
Lus10002780.g.BGIv1.0	6.25968	4.12819	1.26584	3.26123	0.00110932	0.00654896	up	PTHR10795:SF375 - SUBTILISIN-LIKE SERINE ENDOPEPTIDASE FAMILY PROTEIN-RELATED (1 of 4)
Lus10043142.g.BGIv1.0	3.255	4.12561	1.65139	2.49827	0.0124799	0.0491532	up	PTHR23023:SF141 - INDOLE-3-PYRUVATE MONOOXYGENASE YUCCA3-RELATED (1 of 6)
Lus10007485.g.BGIv1.0	3.29025	4.1161	1.50067	2.74285	0.00609093	0.0273905	up	?
Lus10042301.g.BGIv1.0	6.1454	4.10543	1.22169	3.36044	0.000778179	0.0048033	up	PF00197 - Trypsin and protease inhibitor (Kunitz_legume) (1 of 21)
Lus10018783.g.BGIv1.0	15.0099	4.105	0.790118	5.19542	2.04254e-07	2.8297e-06	up	PF00280 - Potato inhibitor I family (potato_inhibit) (1 of 12)
Lus10036864.g.BGIv1.0	11.8168	4.08938	0.889188	4.599	4.24518e-06	4.61662e-05	up	?
Lus10024870.g.BGIv1.0	29.8495	4.08056	0.549585	7.4248	1.12947e-13	3.41218e-12	up	PF00280 - Potato inhibitor I family (potato_inhibit) (1 of 12)
Lus10007902.g.BGIv1.0	11.9644	4.07845	0.884061	4.61331	3.96304e-06	4.34479e-05	up	PF00197 - Trypsin and protease inhibitor (Kunitz_legume) (1 of 21)
Lus10020493.g.BGIv1.0	305.197	4.00871	0.177524	22.5812	6.63837e-113	3.67232e-110	up	K13449 - pathogenesis-related protein 1 (PR1) (1 of 7)
Lus10000625.g.BGIv1.0	42.5652	4.00247	0.458284	8.7336	2.46684e-18	1.08249e-16	up	1.11.1.7 - Peroxidase / Lactoperoxidase (1 of 142)
Lus10029183.g.BGIv1.0	19.3174	3.97243	0.670363	5.92579	3.10802e-09	5.63871e-08	up	PTHR31907:SF1 - MLP-LIKE PROTEIN 423-RELATED (1 of 14)
Lus10000626.g.BGIv1.0	21.8752	3.9602	0.630307	6.28298	3.32153e-10	6.87639e-09	up	PF00141 - Peroxidase (peroxidase) (1 of 149)
Lus10029181.g.BGIv1.0	30.3522	3.95679	0.537117	7.36672	1.74874e-13	5.14484e-12	up	?
Lus10019831.g.BGIv1.0	5.00927	3.85443	1.28528	2.99889	0.00270963	0.0139918	up	PTHR11926:SF152 - UDP-GLUCOSYL TRANSFERASE 73B2-RELATED (1 of 7)
Lus10004908.g.BGIv1.0	136.203	3.82829	0.251078	15.2474	1.71267e-52	3.2652e-50	up	KOG0725 - Reductases with broad range of substrate specificities (1 of 96)
Lus10004906.g.BGIv1.0	239.255	3.81439	0.189367	20.1428	3.11037e-90	1.27999e-87	up	4.2.3.19 - Ent-kaurene synthase / Ent-kaurene synthetase B (1 of 22)
Lus10002839.g.BGIv1.0	37.663	3.73259	0.856427	4.35832	1.31062e-05	0.000127712	up	KOG0156 - Cytochrome P450 CYP2 subfamily (1 of 184)
Lus10034349.g.BGIv1.0	4.83982	3.73213	1.27763	2.92114	0.00348751	0.017317	up	PTHR31042:SF16 - CORE-2/I-BRANCHING BETA-1,6-N-ACETYLGLUCOSAMINYLTRANSFERASE FAMILY PROTEIN (1 of 6)
Lus10019492.g.BGIv1.0	6.8487	3.67809	1.07215	3.43058	0.000602287	0.00385219	up	PTHR11206//PTHR11206:SF159 - MULTIDRUG RESISTANCE PROTEIN // SUBFAMILY NOT NAMED (1 of 4)
Lus10029831.g.BGIv1.0	11.1109	3.67498	0.868654	4.23066	2.33008e-05	0.000214598	up	?
Lus10013595.g.BGIv1.0	15.9999	3.66256	0.687293	5.32897	9.87712e-08	1.43603e-06	up	KOG0725 - Reductases with broad range of substrate specificities (1 of 96)
Lus10024511.g.BGIv1.0	1660.27	3.64726	0.0705828	51.6735	0	0	up	PTHR31048:SF19 - OSMOTIN-LIKE PROTEIN OSM34 (1 of 1)
Lus10010701.g.BGIv1.0	18.0493	3.64472	0.671311	5.42926	5.65896e-08	8.53269e-07	up	PTHR31907:SF1 - MLP-LIKE PROTEIN 423-RELATED (1 of 14)
Lus10003449.g.BGIv1.0	35.1497	3.61789	0.466988	7.74729	9.38734e-15	3.13639e-13	up	PTHR32278:SF6 - F-BOX PROTEIN PP2-B1-RELATED (1 of 18)
Lus10027989.g.BGIv1.0	41.392	3.60189	0.432849	8.32134	8.69723e-17	3.38901e-15	up	PTHR31388:SF22 - PEROXIDASE 22-RELATED (1 of 8)
Lus10012684.g.BGIv1.0	344.855	3.53349	0.149073	23.703	3.35488e-124	2.21981e-121	up	K00430 - peroxidase (E1.11.1.7) (1 of 94)
Lus10000475.g.BGIv1.0	12.6655	3.53007	0.767243	4.60098	4.20511e-06	4.58042e-05	up	KOG1003//KOG4083 - Actin filament-coating protein tropomyosin // Head-elevated expression protein (1 of 1)
Lus10010255.g.BGIv1.0	13.7986	3.45148	0.737202	4.68187	2.84273e-06	3.20401e-05	up	?
Lus10022191.g.BGIv1.0	214.752	3.43714	0.184698	18.6096	2.68748e-77	8.63706e-75	up	PTHR10209:SF122 - 1-AMINOCYCLOPROPANE-1-CARBOXYLATE OXIDASE HOMOLOG 10-RELATED (1 of 27)
Lus10042204.g.BGIv1.0	7.99964	3.43658	0.959124	3.58304	0.000339615	0.00233028	up	4.2.3.22 - Germacradienol synthase / Germacradienol/germacrene-D synthase (1 of 9)
Lus10019833.g.BGIv1.0	35.3318	3.42648	0.450359	7.60834	2.77644e-14	8.84713e-13	up	PTHR11926//PTHR11926:SF190 - GLUCOSYL/GLUCURONOSYL TRANSFERASES // SUBFAMILY NOT NAMED (1 of 6)
Lus10008168.g.BGIv1.0	47.9767	3.40623	0.388277	8.77268	1.74469e-18	7.77735e-17	up	PTHR31388:SF22 - PEROXIDASE 22-RELATED (1 of 8)
Lus10021257.g.BGIv1.0	35.016	3.40289	0.446667	7.6184	2.56844e-14	8.22316e-13	up	KOG0725 - Reductases with broad range of substrate specificities (1 of 96)
Lus10041067.g.BGIv1.0	11.4531	3.40178	0.780737	4.35714	1.31772e-05	0.000128331	up	PTHR11709:SF94 - LACCASE-15 (1 of 4)
Lus10038768.g.BGIv1.0	576.082	3.39938	0.111097	30.5984	1.28501e-205	1.97103e-202	up	?
Lus10025216.g.BGIv1.0	9.16293	3.36852	0.882672	3.81627	0.000135483	0.00103512	up	PF03106 - WRKY DNA -binding domain (WRKY) (1 of 108)
Lus10036512.g.BGIv1.0	7.44353	3.34878	0.958068	3.49535	0.000473447	0.00310645	up	?
Lus10008579.g.BGIv1.0	3.77669	3.34527	1.3389	2.49852	0.0124715	0.0491391	up	PTHR11751:SF418 - 1-AMINOCYCLOPROPANE-1-CARBOXYLATE SYNTHASE 7 (1 of 2)
Lus10035221.g.BGIv1.0	11.0912	3.34297	0.784303	4.26235	2.02288e-05	0.000188935	up	3.4.24.23 - Matrilysin / Uterine metalloendopeptidase (1 of 2)
Lus10020091.g.BGIv1.0	12.9915	3.32723	0.717732	4.63576	3.55636e-06	3.93731e-05	up	K17871 - NADH:ubiquinone reductase (non-electrogenic) (ndh1) (1 of 12)
Lus10036476.g.BGIv1.0	5.27936	3.30956	1.15167	2.87371	0.00405683	0.0196101	up	PF05340 - Protein of unknown function (DUF740) (DUF740) (1 of 9)
Lus10012880.g.BGIv1.0	52.6075	3.30099	0.357826	9.22512	2.83249e-20	1.46824e-18	up	4.2.3.19 - Ent-kaurene synthase / Ent-kaurene synthetase B (1 of 22)
Lus10034230.g.BGIv1.0	68.7575	3.29797	0.314749	10.4781	1.08906e-25	7.59304e-24	up	1.14.13.121 - Premnaspirodiene oxygenase / Hyoscymus muticus premnaspirodiene oxygenase (1 of 43)
Lus10034255.g.BGIv1.0	17.9971	3.28671	0.60126	5.46636	4.59363e-08	7.02047e-07	up	PF12796//PF13962 - Ankyrin repeats (3 copies) (Ank_2) // Domain of unknown function (PGG) (1 of 26)
Lus10032786.g.BGIv1.0	33.7803	3.27177	0.782257	4.18248	2.88351e-05	0.000260171	up	K00430 - peroxidase (E1.11.1.7) (1 of 94)
Lus10011658.g.BGIv1.0	96.6892	3.25935	0.266963	12.209	2.78207e-34	2.94298e-32	up	KOG0156 - Cytochrome P450 CYP2 subfamily (1 of 184)
Lus10025535.g.BGIv1.0	171.825	3.25706	0.210565	15.4682	5.68831e-54	1.14941e-51	up	PTHR31388:SF6 - PEROXIDASE 59 (1 of 2)
Lus10006926.g.BGIv1.0	22.6621	3.24047	0.534874	6.05837	1.37508e-09	2.63199e-08	up	4.2.3.19 - Ent-kaurene synthase / Ent-kaurene synthetase B (1 of 22)
Lus10007841.g.BGIv1.0	6.79896	3.23733	1.01479	3.19013	0.00142208	0.00808424	up	PF00847 - AP2 domain (AP2) (1 of 230)
Lus10010698.g.BGIv1.0	34.2326	3.22298	0.435407	7.40223	1.33917e-13	4.00622e-12	up	PF00407//PF07468 - Pathogenesis-related protein Bet v I family (Bet_v_1) // Agglutinin domain (Agglutinin) (1 of 5)
Lus10011385.g.BGIv1.0	5.17223	3.20845	1.17972	2.71967	0.00653473	0.0290265	up	PTHR11527//PTHR11527:SF137 - SMALL HEAT-SHOCK PROTEIN HSP20 FAMILY // SUBFAMILY NOT NAMED (1 of 4)
Lus10039208.g.BGIv1.0	25.1777	3.20184	0.532028	6.01818	1.76393e-09	3.33093e-08	up	PF00197 - Trypsin and protease inhibitor (Kunitz_legume) (1 of 21)
Lus10021455.g.BGIv1.0	8.19542	3.15271	0.934675	3.37306	0.000743385	0.00462065	up	PTHR18952:SF111 - ALPHA CARBONIC ANHYDRASE 3 (1 of 5)
Lus10007983.g.BGIv1.0	9.98204	3.14055	0.806532	3.8939	9.86462e-05	0.000783251	up	PTHR11945//PTHR11945:SF166 - MADS BOX PROTEIN // SUBFAMILY NOT NAMED (1 of 4)
Lus10022192.g.BGIv1.0	172.22	3.13378	0.191498	16.3646	3.42395e-60	7.85995e-58	up	1.14.11.20 - Deacetoxyvindoline 4-hydroxylase / Desacetyoxyvindoline-17-hydroxylase (1 of 33)
Lus10023918.g.BGIv1.0	6.54259	3.13024	1.0119	3.09342	0.00197864	0.0107157	up	PTHR10641//PTHR10641:SF636 - MYB-LIKE DNA-BINDING PROTEIN MYB // SUBFAMILY NOT NAMED (1 of 2)
Lus10043312.g.BGIv1.0	14.5551	3.11941	0.671191	4.64757	3.35868e-06	3.73809e-05	up	1.14.13.68 - 4-hydroxyphenylacetaldehyde oxime monooxygenase / Cytochrome P450-II-dependent monooxygenase (1 of 3)
Lus10034660.g.BGIv1.0	480.918	3.09577	0.116497	26.5739	1.36034e-155	1.35014e-152	up	3.6.1.9 - Nucleotide diphosphatase / Nucleotide pyrophosphatase (1 of 6)
Lus10021313.g.BGIv1.0	4.7171	3.09154	1.15333	2.68052	0.00735075	0.031986	up	KOG0725 - Reductases with broad range of substrate specificities (1 of 96)
Lus10016991.g.BGIv1.0	4.81938	3.08494	1.13517	2.7176	0.00657564	0.0291852	up	KOG0725 - Reductases with broad range of substrate specificities (1 of 96)
Lus10011427.g.BGIv1.0	4.67572	3.07872	1.16757	2.63687	0.00836753	0.0355889	up	PF07911 - Protein of unknown function (DUF1677) (DUF1677) (1 of 10)
Lus10027202.g.BGIv1.0	107.015	3.06877	0.244519	12.5502	3.96374e-36	4.44373e-34	up	PTHR31707:SF11 - PECTINESTERASE/PECTINESTERASE INHIBITOR 17-RELATED (1 of 3)
Lus10026113.g.BGIv1.0	9.62278	3.06858	0.898447	3.41542	0.000636833	0.00404098	up	PF00892 - EamA-like transporter family (EamA) (1 of 81)
Lus10003148.g.BGIv1.0	63.5324	3.0539	0.316352	9.6535	4.7505e-22	2.74496e-20	up	KOG0156 - Cytochrome P450 CYP2 subfamily (1 of 184)
Lus10010286.g.BGIv1.0	55.4059	3.03549	0.343608	8.83416	1.00855e-18	4.54387e-17	up	?
Lus10034312.g.BGIv1.0	20.1161	3.03149	0.556233	5.45004	5.03595e-08	7.65488e-07	up	PTHR35735:SF1 - PROTEIN NIM1-INTERACTING 2 (1 of 2)
Lus10039210.g.BGIv1.0	29.3159	3.02558	0.47462	6.37473	1.83288e-10	3.95211e-09	up	PF00197 - Trypsin and protease inhibitor (Kunitz_legume) (1 of 21)
Lus10030931.g.BGIv1.0	55.5256	3.00565	0.337768	8.89856	5.65756e-19	2.61885e-17	up	PF01357//PF03330 - Pollen allergen (Pollen_allerg_1) // Rare lipoprotein A (RlpA)-like double-psi beta-barrel (DPBB_1) (1 of 57)
Lus10006535.g.BGIv1.0	103.942	2.99254	0.248244	12.0548	1.82875e-33	1.87572e-31	up	PF00141//PF00190 - Peroxidase (peroxidase) // Cupin (Cupin_1) (1 of 2)
Lus10026357.g.BGIv1.0	10.4906	2.99159	0.755007	3.96234	7.422e-05	0.000607165	up	PF00197 - Trypsin and protease inhibitor (Kunitz_legume) (1 of 21)
Lus10021082.g.BGIv1.0	117.81	2.98832	0.237424	12.5864	2.50773e-36	2.84927e-34	up	PTHR21495:SF71 - DIRIGENT PROTEIN 1-RELATED (1 of 6)
Lus10006925.g.BGIv1.0	27.8486	2.98743	0.471813	6.33181	2.42307e-10	5.12e-09	up	5.5.1.13 - Ent-copalyl diphosphate synthase / Ent-kaurene synthetase A (1 of 5)
Lus10016105.g.BGIv1.0	4.50708	2.98363	1.1542	2.58502	0.00973736	0.0401696	up	PTHR18952:SF111 - ALPHA CARBONIC ANHYDRASE 3 (1 of 5)
Lus10004280.g.BGIv1.0	17.7787	2.97281	0.589423	5.0436	4.56849e-07	5.9707e-06	up	PTHR11601//PTHR11601:SF24 - CYSTEINE DESULFURYLASE // SUBFAMILY NOT NAMED (1 of 2)
Lus10019060.g.BGIv1.0	208.137	2.97083	0.177546	16.7327	7.57122e-63	1.89252e-60	up	PF00069//PF00704 - Protein kinase domain (Pkinase) // Glycosyl hydrolases family 18 (Glyco_hydro_18) (1 of 1)
Lus10017618.g.BGIv1.0	10.2701	2.95785	0.769603	3.84335	0.000121368	0.000938055	up	PTHR31846:SF10 - CHLOROPLASTIC GROUP IIA INTRON SPLICING FACILITATOR CRS1, CHLOROPLASTIC (1 of 2)
Lus10030185.g.BGIv1.0	7.08094	2.93766	0.924808	3.17651	0.00149059	0.0084156	up	PTHR10209:SF196 - F3H7.17 PROTEIN (1 of 1)
Lus10013594.g.BGIv1.0	5.87869	2.9356	1.02234	2.87147	0.00408573	0.0197328	up	PF00106 - short chain dehydrogenase (adh_short) (1 of 81)
Lus10005358.g.BGIv1.0	107.66	2.93504	0.233788	12.5543	3.76629e-36	4.23644e-34	up	PTHR31642:SF57 - SPERMIDINE HYDROXYCINNAMOYL TRANSFERASE (1 of 5)
Lus10029896.g.BGIv1.0	9.85715	2.91676	0.77946	3.74202	0.000182544	0.00134791	up	PTHR11972:SF57 - RESPIRATORY BURST OXIDASE HOMOLOG PROTEIN B (1 of 2)
Lus10029776.g.BGIv1.0	8.5092	2.90219	0.844971	3.43467	0.00059328	0.00380251	up	KOG4473 - Uncharacterized membrane protein (1 of 14)
Lus10014500.g.BGIv1.0	8.3019	2.88484	0.848219	3.40105	0.00067127	0.00423165	up	PF00069//PF00560//PF08263 - Protein kinase domain (Pkinase) // Leucine Rich Repeat (LRR_1) // Leucine rich repeat N-terminal domain (LRRNT_2) (1 of 20)
Lus10005379.g.BGIv1.0	6.97907	2.87129	0.982184	2.92337	0.00346264	0.0172011	up	?
Lus10004410.g.BGIv1.0	370.811	2.86556	0.128172	22.3571	1.03044e-110	5.43315e-108	up	PF00314 - Thaumatin family (Thaumatin) (1 of 43)
Lus10031188.g.BGIv1.0	5.59018	2.85128	1.03636	2.75123	0.00593716	0.0268313	up	K00279 - cytokinin dehydrogenase (CKX) (1 of 6)
Lus10007035.g.BGIv1.0	21.5339	2.84533	0.518927	5.48311	4.17921e-08	6.43373e-07	up	PTHR11746//PTHR11746:SF99 - O-METHYLTRANSFERASE // SUBFAMILY NOT NAMED (1 of 22)
Lus10000310.g.BGIv1.0	39.1486	2.83272	0.393806	7.19319	6.32946e-13	1.75503e-11	up	PTHR10791:SF34 - BIDIRECTIONAL SUGAR TRANSPORTER SWEET15 (1 of 4)
Lus10022310.g.BGIv1.0	40.478	2.82491	0.383907	7.35833	1.86229e-13	5.46461e-12	up	PTHR31683:SF29 - PECTATE LYASE 11-RELATED (1 of 3)
Lus10031599.g.BGIv1.0	8.31669	2.82137	0.904114	3.12059	0.0018049	0.00990992	up	?
Lus10014689.g.BGIv1.0	32.4518	2.81998	0.444476	6.34451	2.2314e-10	4.73278e-09	up	K15095 - (+)-neomenthol dehydrogenase (E1.1.1.208) (1 of 9)
Lus10008410.g.BGIv1.0	33.1195	2.81905	0.433736	6.49946	8.0609e-11	1.80501e-09	up	1.3.3.8 - Tetrahydroberberine oxidase / THB oxidase (1 of 42)
Lus10036043.g.BGIv1.0	9.29082	2.817	0.822815	3.42361	0.000617946	0.00393817	up	2.3.1.84 - Alcohol O-acetyltransferase / AATASE (1 of 62)
Lus10042210.g.BGIv1.0	5.36075	2.81577	1.05273	2.67475	0.00747859	0.0324252	up	PF00234 - Protease inhibitor/seed storage/LTP family (Tryp_alpha_amyl) (1 of 39)
Lus10028898.g.BGIv1.0	58.8798	2.80856	0.316686	8.86861	7.4067e-19	3.373e-17	up	1.14.13.152 - Geraniol 8-hydroxylase / G10H (1 of 16)
Lus10011318.g.BGIv1.0	5.40871	2.80582	1.03886	2.70086	0.00691606	0.0304478	up	PTHR10334:SF212 - PATHOGENESIS-RELATED PROTEIN HOMOLOG (1 of 3)
Lus10013356.g.BGIv1.0	26.4472	2.80397	0.462461	6.06315	1.33478e-09	2.55921e-08	up	PTHR10638:SF36 - AMINE OXIDASE-RELATED (1 of 5)
Lus10003451.g.BGIv1.0	74.6724	2.78592	0.272895	10.2088	1.81105e-24	1.19596e-22	up	PTHR31907:SF1 - MLP-LIKE PROTEIN 423-RELATED (1 of 14)
Lus10020492.g.BGIv1.0	9.37919	2.77596	0.796937	3.48328	0.000495307	0.00322978	up	PTHR10334:SF223 - F2J10.6 PROTEIN-RELATED (1 of 11)
Lus10014754.g.BGIv1.0	11.648	2.77086	0.683381	4.05463	5.02131e-05	0.000428756	up	K08176 - MFS transporter, PHS family, inorganic phosphate transporter (PHO84) (1 of 10)
Lus10015754.g.BGIv1.0	5.36402	2.75776	1.09632	2.51545	0.0118879	0.0471894	up	PTHR10791:SF34 - BIDIRECTIONAL SUGAR TRANSPORTER SWEET15 (1 of 4)
Lus10041973.g.BGIv1.0	8.8233	2.74872	0.797536	3.44652	0.00056785	0.00365619	up	PTHR24015:SF419 - NUCLEOTIDE-DIPHOSPHO-SUGAR TRANSFERASE DOMAIN-CONTAINING PROTEIN-RELATED (1 of 9)
Lus10039768.g.BGIv1.0	10.1666	2.74581	0.749751	3.66229	0.00024997	0.00178562	up	K17871 - NADH:ubiquinone reductase (non-electrogenic) (ndh1) (1 of 12)
Lus10007892.g.BGIv1.0	11.746	2.74544	0.700549	3.91899	8.89215e-05	0.000714612	up	PF00197 - Trypsin and protease inhibitor (Kunitz_legume) (1 of 21)
Lus10020826.g.BGIv1.0	16.8497	2.74385	0.581154	4.72137	2.34258e-06	2.68331e-05	up	K00430 - peroxidase (E1.11.1.7) (1 of 94)
Lus10004907.g.BGIv1.0	90.4488	2.7408	0.268214	10.2187	1.63507e-24	1.08613e-22	up	1.14.13.121 - Premnaspirodiene oxygenase / Hyoscymus muticus premnaspirodiene oxygenase (1 of 43)
Lus10020491.g.BGIv1.0	95.2235	2.72988	0.246057	11.0945	1.33376e-28	1.11682e-26	up	K13449 - pathogenesis-related protein 1 (PR1) (1 of 7)
Lus10028689.g.BGIv1.0	854.041	2.72656	0.0865431	31.5052	7.37489e-218	1.24433e-214	up	PTHR31235:SF77 - PEROXIDASE 12 (1 of 2)
Lus10037121.g.BGIv1.0	4.99899	2.72203	1.06434	2.55749	0.010543	0.0428799	up	PTHR11260:SF201 - GLUTATHIONE S-TRANSFERASE F14-RELATED (1 of 4)
Lus10039378.g.BGIv1.0	26.4913	2.72002	0.449778	6.04747	1.47141e-09	2.80365e-08	up	PTHR14154:SF5 - EARLY LIGHT-INDUCED PROTEIN 1, CHLOROPLASTIC-RELATED (1 of 4)
Lus10025253.g.BGIv1.0	11.2187	2.71527	0.698046	3.88981	0.000100322	0.000795809	up	PTHR31087:SF11 - PROTEIN LURP-ONE-RELATED 1-RELATED (1 of 13)
Lus10017981.g.BGIv1.0	11.5541	2.71514	0.698164	3.88898	0.000100668	0.000797614	up	PTHR24015:SF419 - NUCLEOTIDE-DIPHOSPHO-SUGAR TRANSFERASE DOMAIN-CONTAINING PROTEIN-RELATED (1 of 9)
Lus10025133.g.BGIv1.0	20.3176	2.68839	0.548318	4.90297	9.43989e-07	1.1592e-05	up	PF03106 - WRKY DNA -binding domain (WRKY) (1 of 108)
Lus10030483.g.BGIv1.0	50.9666	2.68458	0.32767	8.19292	2.54956e-16	9.62359e-15	up	PTHR21495:SF59 - DIRIGENT PROTEIN 20-RELATED (1 of 5)
Lus10012641.g.BGIv1.0	19.847	2.68421	0.522043	5.14175	2.72197e-07	3.6948e-06	up	1.3.3.8 - Tetrahydroberberine oxidase / THB oxidase (1 of 42)
Lus10010110.g.BGIv1.0	13.6297	2.67937	0.632606	4.23545	2.28097e-05	0.000210544	up	K14488 - SAUR family protein (SAUR) (1 of 68)
Lus10024076.g.BGIv1.0	6.14176	2.6618	0.935311	2.8459	0.00442863	0.0211258	up	2.4.1.69 - Galactoside 2-alpha-L-fucosyltransferase / Secretor-type beta-galactoside alpha-1->2 fucosyltransferase (1 of 17)
Lus10032641.g.BGIv1.0	11.0882	2.65928	0.694438	3.8294	0.000128458	0.000987205	up	PTHR11552:SF140 - F7A19.28 PROTEIN (1 of 18)
Lus10002244.g.BGIv1.0	47.4776	2.64574	0.362059	7.30749	2.72185e-13	7.83244e-12	up	PTHR10795//PTHR10795:SF370 - PROPROTEIN CONVERTASE SUBTILISIN/KEXIN // SUBFAMILY NOT NAMED (1 of 33)
Lus10026748.g.BGIv1.0	15.362	2.64166	0.654027	4.03906	5.36655e-05	0.000455354	up	PTHR31388:SF6 - PEROXIDASE 59 (1 of 2)
Lus10030648.g.BGIv1.0	9.46165	2.6336	0.766437	3.43616	0.000590012	0.00378444	up	?
Lus10013732.g.BGIv1.0	7.19609	2.63275	0.853064	3.08623	0.00202715	0.010945	up	PF00197 - Trypsin and protease inhibitor (Kunitz_legume) (1 of 21)
Lus10005037.g.BGIv1.0	41.6967	2.61939	0.372223	7.03715	1.96211e-12	5.17277e-11	up	1.14.11.19 - Leucocyanidin oxygenase / Leucoanthocyanidin dioxygenase (1 of 6)
Lus10029802.g.BGIv1.0	58.7729	2.61928	0.30651	8.54547	1.28009e-17	5.3198e-16	up	PF00069//PF00954//PF01453//PF08276 - Protein kinase domain (Pkinase) // S-locus glycoprotein domain (S_locus_glycop) // D-mannose binding lectin (B_lectin) // PAN-like domain (PAN_2) (1 of 13)
Lus10020406.g.BGIv1.0	5.9407	2.59976	0.93477	2.78118	0.00541615	0.0248745	up	?
Lus10022762.g.BGIv1.0	110.72	2.59811	0.218756	11.8767	1.56339e-32	1.52475e-30	up	KOG0156 - Cytochrome P450 CYP2 subfamily (1 of 184)
Lus10018024.g.BGIv1.0	9.33669	2.58309	0.753562	3.42784	0.000608409	0.00388472	up	PTHR11017//PTHR11017:SF174 - LEUCINE-RICH REPEAT-CONTAINING PROTEIN // SUBFAMILY NOT NAMED (1 of 26)
Lus10013880.g.BGIv1.0	36.0753	2.58192	0.402398	6.41633	1.39598e-10	3.05494e-09	up	?
Lus10039989.g.BGIv1.0	6.90963	2.56909	0.934763	2.74839	0.00598886	0.0270215	up	PTHR31065:SF11 - PLATZ TRANSCRIPTION FACTOR FAMILY PROTEIN (1 of 5)
Lus10009151.g.BGIv1.0	5.8679	2.5636	0.979838	2.61636	0.00888741	0.0373017	up	PF13947//PF14380 - Wall-associated receptor kinase galacturonan-binding (GUB_WAK_bind) // Wall-associated receptor kinase C-terminal (WAK_assoc) (1 of 5)
Lus10014508.g.BGIv1.0	311.301	2.55843	0.130633	19.5848	2.08342e-85	8.08105e-83	up	PF00407 - Pathogenesis-related protein Bet v I family (Bet_v_1) (1 of 55)
Lus10011418.g.BGIv1.0	7.85029	2.55454	0.832579	3.06822	0.00215338	0.0115123	up	K01184 - polygalacturonase (E3.2.1.15) (1 of 6)
Lus10040653.g.BGIv1.0	9.21829	2.54442	0.793077	3.20829	0.00133527	0.0076658	up	2.7.11.1 - Non-specific serine/threonine protein kinase / Threonine-specific protein kinase (1 of 1714)
Lus10008368.g.BGIv1.0	14.4436	2.54191	0.630589	4.031	5.55389e-05	0.000469244	up	PTHR22849:SF0 - WD REPEAT, SAM AND U-BOX DOMAIN-CONTAINING PROTEIN 1 (1 of 1)
Lus10041064.g.BGIv1.0	24.7518	2.54006	0.488433	5.20042	1.98835e-07	2.76298e-06	up	PTHR27000:SF52 - LEUCINE-RICH REPEAT (LRR) FAMILY PROTEIN-RELATED (1 of 6)
Lus10026124.g.BGIv1.0	13.2244	2.53537	0.667231	3.79984	0.00014479	0.00110019	up	?
Lus10018793.g.BGIv1.0	22.9131	2.52632	0.497261	5.08047	3.7651e-07	4.99816e-06	up	PF03350 - Uncharacterized protein family, UPF0114 (UPF0114) (1 of 7)
Lus10039511.g.BGIv1.0	67.2475	2.52614	0.291643	8.66175	4.64564e-18	1.99196e-16	up	PF14368 - Probable lipid transfer (LTP_2) (1 of 77)
Lus10041460.g.BGIv1.0	42.9435	2.52577	0.346595	7.28739	3.16025e-13	9.02222e-12	up	PTHR35735:SF1 - PROTEIN NIM1-INTERACTING 2 (1 of 2)
Lus10026054.g.BGIv1.0	16.7683	2.52381	0.596657	4.22991	2.3378e-05	0.000215191	up	K06130 - lysophospholipase II (LYPLA2) (1 of 4)
Lus10038639.g.BGIv1.0	8.99554	2.52077	0.758225	3.32457	0.000885555	0.00537852	up	PTHR22950//PTHR22950:SF251 - AMINO ACID TRANSPORTER // SUBFAMILY NOT NAMED (1 of 4)
Lus10002357.g.BGIv1.0	40.3764	2.51849	0.361652	6.96386	3.31069e-12	8.52819e-11	up	KOG0156 - Cytochrome P450 CYP2 subfamily (1 of 184)
Lus10003231.g.BGIv1.0	3441.89	2.5172	0.0514643	48.9115	0	0	up	PTHR22595//PTHR22595:SF60 - CHITINASE-RELATED // SUBFAMILY NOT NAMED (1 of 9)
Lus10020249.g.BGIv1.0	84.6584	2.5144	0.250336	10.0441	9.75284e-24	6.11728e-22	up	PF07468 - Agglutinin domain (Agglutinin) (1 of 19)
Lus10033385.g.BGIv1.0	219.816	2.4978	0.167777	14.8876	3.96916e-50	7.08673e-48	up	PTHR13789//PTHR13789:SF234 - MONOOXYGENASE // SUBFAMILY NOT NAMED (1 of 6)
Lus10025269.g.BGIv1.0	10.1354	2.48802	0.765474	3.2503	0.00115285	0.0067669	up	PTHR34052:SF1 - AUXIN RESPONSE FACTOR 30-RELATED (1 of 2)
Lus10027376.g.BGIv1.0	461.133	2.48634	0.117915	21.0858	1.07353e-98	4.83016e-96	up	PF04554 - Extensin-like region (Extensin_2) (1 of 7)
Lus10039209.g.BGIv1.0	32.1754	2.48416	0.403961	6.14952	7.77167e-10	1.53455e-08	up	PF00197 - Trypsin and protease inhibitor (Kunitz_legume) (1 of 21)
Lus10038917.g.BGIv1.0	79.6743	2.48366	0.265661	9.34898	8.84973e-21	4.77051e-19	up	PTHR31707:SF11 - PECTINESTERASE/PECTINESTERASE INHIBITOR 17-RELATED (1 of 3)
Lus10002555.g.BGIv1.0	621.967	2.48344	0.0983914	25.2405	1.44168e-140	1.10567e-137	up	?
Lus10026094.g.BGIv1.0	58.9718	2.47334	0.302739	8.16988	3.08684e-16	1.15739e-14	up	K17302 - coatomer, subunit beta' (COPB2, SEC27) (1 of 4)
Lus10031234.g.BGIv1.0	15.545	2.4705	0.637132	3.87753	0.000105521	0.000830024	up	PTHR10353//PTHR10353:SF81 - GLYCOSYL HYDROLASE // SUBFAMILY NOT NAMED (1 of 3)
Lus10014284.g.BGIv1.0	30.5202	2.4676	0.411497	5.99664	2.01436e-09	3.75759e-08	up	PTHR23070//PTHR23070:SF24 - BCS1 AAA-TYPE ATPASE // SUBFAMILY NOT NAMED (1 of 2)
Lus10027522.g.BGIv1.0	18.1329	2.46665	0.548727	4.49522	6.94982e-06	7.17631e-05	up	PTHR22814:SF77 - HEAVY-METAL-ASSOCIATED DOMAIN-CONTAINING PROTEIN (1 of 7)
Lus10030678.g.BGIv1.0	15.7123	2.46435	0.660361	3.73182	0.0001901	0.00139637	up	?
Lus10032331.g.BGIv1.0	53.7949	2.46148	0.33255	7.40183	1.34322e-13	4.0148e-12	up	PTHR21495//PTHR21495:SF70 - NUCLEOPORIN-RELATED // SUBFAMILY NOT NAMED (1 of 3)
Lus10019457.g.BGIv1.0	30.4387	2.45375	0.429821	5.70876	1.13803e-08	1.90301e-07	up	PF00067 - Cytochrome P450 (p450) (1 of 443)
Lus10008213.g.BGIv1.0	5.45806	2.44467	0.963154	2.5382	0.0111426	0.0448426	up	PTHR33470:SF1 - POLLEN OLE E 1 ALLERGEN AND EXTENSIN FAMILY PROTEIN (1 of 4)
Lus10008768.g.BGIv1.0	8.66598	2.43774	0.783747	3.11037	0.00186853	0.0102211	up	PF00226//PF13459 - DnaJ domain (DnaJ) // 4Fe-4S single cluster domain (Fer4_15) (1 of 3)
Lus10021703.g.BGIv1.0	7.36347	2.43291	0.824497	2.95079	0.00316967	0.0159833	up	?
Lus10039513.g.BGIv1.0	9.76035	2.43067	0.755638	3.21671	0.00129672	0.00748379	up	3.2.1.149//3.2.1.21 - Beta-glucosidase / Gentobiase (1 of 3)
Lus10010544.g.BGIv1.0	6.25662	2.41774	0.92074	2.62587	0.00864287	0.0364978	up	KOG0725 - Reductases with broad range of substrate specificities (1 of 96)
Lus10008112.g.BGIv1.0	42.2938	2.41566	0.35254	6.85217	7.27371e-12	1.81413e-10	up	1.14.13.21 - Flavonoid 3'-monooxygenase / Flavonoid 3'-hydroxylase (1 of 14)
Lus10030480.g.BGIv1.0	9.66476	2.40979	0.775415	3.10774	0.00188526	0.0102826	up	PTHR33781:SF4 - PROTEIN PHYTOCHROME KINASE SUBSTRATE 1-RELATED (1 of 4)
Lus10008221.g.BGIv1.0	21.0107	2.40843	0.490205	4.9131	8.96458e-07	1.10647e-05	up	PF00931//PF01582 - NB-ARC domain (NB-ARC) // TIR domain (TIR) (1 of 22)
Lus10020407.g.BGIv1.0	7.06781	2.40751	0.886823	2.71476	0.00663242	0.029414	up	3.6.1.12 - dCTP diphosphatase / Deoxycytidine-triphosphatase (1 of 4)
Lus10029185.g.BGIv1.0	103.933	2.40163	0.223167	10.7616	5.22522e-27	3.92706e-25	up	PTHR31907:SF1 - MLP-LIKE PROTEIN 423-RELATED (1 of 14)
Lus10000193.g.BGIv1.0	73.9276	2.39986	0.287909	8.33547	7.71912e-17	3.01483e-15	up	PTHR22595:SF34 - BASIC ENDOCHITINASE B (1 of 10)
Lus10038933.g.BGIv1.0	33.7133	2.38845	0.413715	5.77317	7.77931e-09	1.33662e-07	up	PF01357//PF03330 - Pollen allergen (Pollen_allerg_1) // Rare lipoprotein A (RlpA)-like double-psi beta-barrel (DPBB_1) (1 of 57)
Lus10026417.g.BGIv1.0	56.2175	2.3805	0.305032	7.80411	5.99219e-15	2.04456e-13	up	KOG1003 - Actin filament-coating protein tropomyosin (1 of 21)
Lus10011013.g.BGIv1.0	60.1592	2.37169	0.29342	8.08294	6.3223e-16	2.32911e-14	up	PTHR31692:SF10 - EXPANSIN-LIKE B1 (1 of 8)
Lus10004496.g.BGIv1.0	18.3255	2.36683	0.560284	4.22435	2.39632e-05	0.000220217	up	K05681 - ATP-binding cassette, subfamily G (WHITE), member 2 (ABCG2) (1 of 1)
Lus10021287.g.BGIv1.0	36.0596	2.35391	0.410616	5.73264	9.8877e-09	1.67165e-07	up	PTHR31415:SF4 - HARPIN-INDUCED PROTEIN-LIKE-RELATED (1 of 3)
Lus10019183.g.BGIv1.0	11.0416	2.35276	0.746972	3.14973	0.00163419	0.00909246	up	2.3.1.107 - Deacetylvindoline O-acetyltransferase / Deacetylvindoline acetyltransferase (1 of 5)
Lus10032939.g.BGIv1.0	28.5762	2.34651	0.438421	5.35218	8.69029e-08	1.2728e-06	up	PTHR21495//PTHR21495:SF72 - NUCLEOPORIN-RELATED // SUBFAMILY NOT NAMED (1 of 1)
Lus10009901.g.BGIv1.0	21.3418	2.3459	0.484259	4.84431	1.27055e-06	1.53015e-05	up	K00430 - peroxidase (E1.11.1.7) (1 of 94)
Lus10023365.g.BGIv1.0	16.0422	2.34355	0.56258	4.16572	3.10371e-05	0.000278253	up	1.3.3.8 - Tetrahydroberberine oxidase / THB oxidase (1 of 42)
Lus10003749.g.BGIv1.0	10.3042	2.34117	0.74682	3.13485	0.00171942	0.0094931	up	PF05729//PF13676 - NACHT domain (NACHT) // TIR domain (TIR_2) (1 of 6)
Lus10011274.g.BGIv1.0	7.93078	2.33879	0.802783	2.91335	0.00357572	0.0176666	up	PTHR23023:SF83 - INDOLE-3-PYRUVATE MONOOXYGENASE YUCCA5-RELATED (1 of 3)
Lus10042020.g.BGIv1.0	18.1287	2.32949	0.563918	4.1309	3.61339e-05	0.000319449	up	PTHR11017//PTHR11017:SF174 - LEUCINE-RICH REPEAT-CONTAINING PROTEIN // SUBFAMILY NOT NAMED (1 of 26)
Lus10033005.g.BGIv1.0	13.8027	2.32864	0.643469	3.61889	0.000295872	0.00206598	up	?
Lus10008706.g.BGIv1.0	19.2067	2.32239	0.512234	4.53385	5.79189e-06	6.10075e-05	up	PF00892 - EamA-like transporter family (EamA) (1 of 81)
Lus10006789.g.BGIv1.0	19.3043	2.31894	0.517294	4.48282	7.36617e-06	7.55077e-05	up	PF00931//PF01582 - NB-ARC domain (NB-ARC) // TIR domain (TIR) (1 of 22)
Lus10003150.g.BGIv1.0	20.4072	2.29879	0.499123	4.60566	4.11161e-06	4.49163e-05	up	PTHR24078//PTHR24078:SF222 - DNAJ HOMOLOG SUBFAMILY C MEMBER // SUBFAMILY NOT NAMED (1 of 7)
Lus10017542.g.BGIv1.0	40.6119	2.29554	0.369601	6.21087	5.26937e-10	1.06158e-08	up	2.4.1.324 - 7-deoxyloganetin glucosyltransferase / UGT85A24 (1 of 35)
Lus10028695.g.BGIv1.0	8.05054	2.28696	0.819692	2.79002	0.00527041	0.0243597	up	4.4.1.4 - Alliin lyase / L-cysteine sulfoxide lyase (1 of 1)
Lus10008167.g.BGIv1.0	346.472	2.28371	0.120015	19.0286	9.89526e-81	3.27368e-78	up	PTHR31388:SF22 - PEROXIDASE 22-RELATED (1 of 8)
Lus10020728.g.BGIv1.0	11.8023	2.275	0.642059	3.54328	0.000395176	0.00265376	up	?
Lus10015802.g.BGIv1.0	11.719	2.27432	0.642396	3.54037	0.000399559	0.00267948	up	PTHR23070//PTHR23070:SF12 - BCS1 AAA-TYPE ATPASE // SUBFAMILY NOT NAMED (1 of 2)
Lus10019030.g.BGIv1.0	7.92064	2.26598	0.801125	2.8285	0.00467667	0.0221183	up	PF14368 - Probable lipid transfer (LTP_2) (1 of 77)
Lus10004537.g.BGIv1.0	18.1679	2.26535	0.528794	4.28399	1.8357e-05	0.000172839	up	PTHR31221:SF37 - WRKY TRANSCRIPTION FACTOR 71-RELATED (1 of 2)
Lus10039689.g.BGIv1.0	24.22	2.26402	0.477889	4.73754	2.16327e-06	2.49827e-05	up	1.3.1.3 - Delta(4)-3-oxosteroid 5-beta-reductase / Testosterone 5-beta-reductase (1 of 8)
Lus10036194.g.BGIv1.0	19.57	2.25865	0.535122	4.22082	2.43417e-05	0.000223149	up	PTHR31719:SF5 - NAC DOMAIN-CONTAINING PROTEIN 6-RELATED (1 of 2)
Lus10030427.g.BGIv1.0	13.3811	2.2513	0.632466	3.55955	0.000371489	0.00251775	up	PTHR33133:SF7 - F26K24.10 PROTEIN (1 of 3)
Lus10021318.g.BGIv1.0	24.6851	2.24943	0.443776	5.06885	4.00234e-07	5.29643e-06	up	KOG0725 - Reductases with broad range of substrate specificities (1 of 96)
Lus10033002.g.BGIv1.0	16.2239	2.24215	0.547054	4.09858	4.15687e-05	0.000362558	up	PF04588 - Hypoxia induced protein conserved region (HIG_1_N) (1 of 7)
Lus10010700.g.BGIv1.0	21.6409	2.23845	0.504815	4.43421	9.24111e-06	9.27823e-05	up	PTHR31907:SF1 - MLP-LIKE PROTEIN 423-RELATED (1 of 14)
Lus10026032.g.BGIv1.0	19.2136	2.23731	0.509478	4.39137	1.12639e-05	0.000111043	up	PTHR23500:SF154 - POLYOL TRANSPORTER 3-RELATED (1 of 6)
Lus10016145.g.BGIv1.0	8.38366	2.23578	0.770411	2.90206	0.00370722	0.0182149	up	1.14.11.23//1.14.11.9 - Flavonol synthase / FLS // Flavanone 3-dioxygenase / Naringenin,2-oxoglutarate:oxygen oxidoreductase (3-hydroxylating) (1 of 4)
Lus10035132.g.BGIv1.0	13.2875	2.23154	0.612586	3.64281	0.000269675	0.0019042	up	PTHR33417:SF1 - B12D PROTEIN (1 of 1)
Lus10020157.g.BGIv1.0	7.7532	2.23069	0.874783	2.54999	0.0107727	0.0436929	up	?
Lus10041830.g.BGIv1.0	260.035	2.22779	0.137066	16.2534	2.11384e-59	4.78734e-57	up	PF00182//PF00187 - Chitinase class I (Glyco_hydro_19) // Chitin recognition protein (Chitin_bind_1) (1 of 3)
Lus10019858.g.BGIv1.0	6.4547	2.22087	0.870532	2.55116	0.0107364	0.0435719	up	K09843 - (+)-abscisic acid 8'-hydroxylase (E1.14.13.93) (1 of 8)
Lus10030708.g.BGIv1.0	13.8463	2.22046	0.612785	3.62356	0.000290578	0.00203392	up	1.14.13.121 - Premnaspirodiene oxygenase / Hyoscymus muticus premnaspirodiene oxygenase (1 of 43)
Lus10022302.g.BGIv1.0	37.3344	2.21583	0.392313	5.64812	1.6221e-08	2.64946e-07	up	PF00197//PF04446//PF14413 - Trypsin and protease inhibitor (Kunitz_legume) // tRNAHis guanylyltransferase (Thg1) // Thg1 C terminal domain (Thg1C) (1 of 1)
Lus10020714.g.BGIv1.0	24.2526	2.21339	0.457521	4.83779	1.31291e-06	1.57722e-05	up	PTHR31625:SF2 - COUMAROYL-COA:ANTHOCYANIDIN 3-O-GLUCOSIDE-6''-O-COUMAROYLTRANSFERASE 1-RELATED (1 of 11)
Lus10015351.g.BGIv1.0	40.3535	2.21074	0.355627	6.21647	5.08474e-10	1.02745e-08	up	PTHR11654:SF59 - PROTEIN NRT1/ PTR FAMILY 2.10-RELATED (1 of 4)
Lus10035255.g.BGIv1.0	104.647	2.20615	0.220602	10.0006	1.5154e-23	9.40021e-22	up	PTHR23500:SF109 - POLYOL TRANSPORTER 5 (1 of 9)
Lus10000478.g.BGIv1.0	49.4411	2.20567	0.314139	7.02134	2.19755e-12	5.74409e-11	up	?
Lus10039251.g.BGIv1.0	7.675	2.20537	0.812415	2.71458	0.006636	0.029426	up	PTHR10283//PTHR10283:SF94 - SOLUTE CARRIER FAMILY 13 MEMBER // SUBFAMILY NOT NAMED (1 of 2)
Lus10006657.g.BGIv1.0	296.4	2.20521	0.143237	15.3955	1.75449e-53	3.4623e-51	up	PTHR33021:SF55 - BLUE COPPER PROTEIN (1 of 3)
Lus10021288.g.BGIv1.0	18.8923	2.19242	0.526286	4.16583	3.10227e-05	0.000278199	up	PTHR31415:SF4 - HARPIN-INDUCED PROTEIN-LIKE-RELATED (1 of 3)
Lus10007187.g.BGIv1.0	764.431	2.1894	0.513783	4.26134	2.03203e-05	0.000189684	up	?
Lus10039783.g.BGIv1.0	10.1346	2.18773	0.687496	3.18217	0.00146178	0.0082737	up	PTHR33510:SF2 - PROTEIN TIC 20-IV, CHLOROPLASTIC (1 of 1)
Lus10036760.g.BGIv1.0	10.9775	2.1869	0.656077	3.3333	0.00085821	0.005236	up	PTHR31089:SF4 - CYCLIC DOF FACTOR 2-RELATED (1 of 7)
Lus10013551.g.BGIv1.0	32.8938	2.17835	0.411758	5.29035	1.22079e-07	1.75077e-06	up	PTHR22849//PTHR22849:SF31 - WDSAM1 PROTEIN // SUBFAMILY NOT NAMED (1 of 2)
Lus10025850.g.BGIv1.0	8.3063	2.17312	0.768554	2.82754	0.00469068	0.0221618	up	PTHR36328:SF1 - CRYPTDIN PROTEIN-LIKE PROTEIN (1 of 1)
Lus10034374.g.BGIv1.0	6.38103	2.17278	0.857466	2.53396	0.0112782	0.0452214	up	PTHR31636:SF13 - SCARECROW-LIKE PROTEIN 3 (1 of 2)
Lus10021936.g.BGIv1.0	330.24	2.1672	0.133297	16.2584	1.94829e-59	4.44224e-57	up	PTHR13683:SF268 - EUKARYOTIC ASPARTYL PROTEASE FAMILY PROTEIN (1 of 11)
Lus10017273.g.BGIv1.0	11.146	2.16165	0.704706	3.06745	0.00215894	0.0115402	up	K04730 - interleukin-1 receptor-associated kinase 1 (IRAK1) (1 of 25)
Lus10032178.g.BGIv1.0	1023.75	2.16069	0.0794592	27.1925	7.97165e-163	8.67753e-160	up	PF00407 - Pathogenesis-related protein Bet v I family (Bet_v_1) (1 of 55)
Lus10028628.g.BGIv1.0	11.7873	2.15357	0.659571	3.2651	0.00109424	0.0064758	up	1.14.13.109 - Abieta-7,13-dien-18-ol hydroxylase / CYP720B1 (1 of 10)
Lus10039285.g.BGIv1.0	21.5853	2.15325	0.482449	4.46316	8.07584e-06	8.21336e-05	up	PTHR22814:SF77 - HEAVY-METAL-ASSOCIATED DOMAIN-CONTAINING PROTEIN (1 of 7)
Lus10020331.g.BGIv1.0	80.1462	2.14576	0.249726	8.59245	8.51339e-18	3.57764e-16	up	PTHR31642:SF9 - (Z)-3-HEXEN-1-OL ACETYLTRANSFERASE (1 of 13)
Lus10031623.g.BGIv1.0	43.3136	2.1423	0.365722	5.85774	4.69208e-09	8.29845e-08	up	PTHR11783:SF74 - CYTOSOLIC SULFOTRANSFERASE 1-RELATED (1 of 5)
Lus10032943.g.BGIv1.0	45.4609	2.14109	0.3311	6.46659	1.0024e-10	2.22832e-09	up	1.3.3.8 - Tetrahydroberberine oxidase / THB oxidase (1 of 42)
Lus10002548.g.BGIv1.0	9.65818	2.13902	0.710323	3.01133	0.00260102	0.0135283	up	PF00004//PF05695 - ATPase family associated with various cellular activities (AAA) (AAA) // Plant protein of unknown function (DUF825) (DUF825) (1 of 1)
Lus10003265.g.BGIv1.0	509.697	2.13017	0.110021	19.3615	1.6322e-83	6.05259e-81	up	PTHR22595//PTHR22595:SF48 - CHITINASE-RELATED // SUBFAMILY NOT NAMED (1 of 9)
Lus10015339.g.BGIv1.0	1929.02	2.12551	0.0536452	39.6216	0	0	up	PF00407 - Pathogenesis-related protein Bet v I family (Bet_v_1) (1 of 55)
Lus10016883.g.BGIv1.0	1300.36	2.11831	0.0671903	31.527	3.7098e-218	6.5888e-215	up	3.2.1.39 - Glucan endo-1,3-beta-D-glucosidase / Laminarinase (1 of 112)
Lus10001394.g.BGIv1.0	16.0631	2.11578	0.564051	3.75105	0.000176096	0.00130659	up	PTHR10641//PTHR10641:SF506 - MYB-LIKE DNA-BINDING PROTEIN MYB // SUBFAMILY NOT NAMED (1 of 5)
Lus10019801.g.BGIv1.0	204.032	2.11122	0.159431	13.2422	5.00381e-40	6.39596e-38	up	PTHR32227:SF49 - BETA-1,3-GLUCANASE 1-RELATED (1 of 13)
Lus10006302.g.BGIv1.0	256.442	2.10804	0.152923	13.785	3.13849e-43	4.56501e-41	up	PF00314 - Thaumatin family (Thaumatin) (1 of 43)
Lus10040274.g.BGIv1.0	18.4141	2.10598	0.506371	4.15896	3.19707e-05	0.000285713	up	PTHR31529:SF6 - LOB DOMAIN-CONTAINING PROTEIN 33 (1 of 2)
Lus10017703.g.BGIv1.0	63.9133	2.10064	0.278632	7.53911	4.7319e-14	1.47675e-12	up	K00815 - tyrosine aminotransferase (TAT) (1 of 9)
Lus10033782.g.BGIv1.0	32.5568	2.0988	0.402309	5.21688	1.81962e-07	2.53731e-06	up	PTHR27007:SF24 - L-TYPE LECTIN-DOMAIN CONTAINING RECEPTOR KINASE IX.1-RELATED (1 of 23)
Lus10033582.g.BGIv1.0	12.0216	2.09718	0.638801	3.28299	0.00102712	0.00612912	up	2.5.1.29 - Geranylgeranyl diphosphate synthase / Geranylgeranyl-PP synthetase (1 of 18)
Lus10041715.g.BGIv1.0	13.8999	2.0902	0.589778	3.54405	0.000394031	0.00264714	up	K12356 - coniferyl-alcohol glucosyltransferase (UGT72E) (1 of 4)
Lus10000622.g.BGIv1.0	19.7743	2.0791	0.493764	4.21071	2.54564e-05	0.000232799	up	PTHR31238:SF44 - GERMIN-LIKE PROTEIN SUBFAMILY 1 MEMBER 13-RELATED (1 of 14)
Lus10008917.g.BGIv1.0	15.6402	2.07515	0.543881	3.81545	0.000135936	0.00103746	up	1.14.13.152 - Geraniol 8-hydroxylase / G10H (1 of 16)
Lus10043311.g.BGIv1.0	17.1771	2.07458	0.529102	3.92094	8.82047e-05	0.000709866	up	PF00067 - Cytochrome P450 (p450) (1 of 443)
Lus10012788.g.BGIv1.0	36.238	2.05775	0.385332	5.3402	9.28455e-08	1.35513e-06	up	PTHR33649:SF2 - PAR1 PROTEIN (1 of 2)
Lus10023450.g.BGIv1.0	11.3626	2.05559	0.699143	2.94016	0.00328042	0.0164484	up	PTHR12542:SF26 - EXOCYST SUBUNIT EXO70 FAMILY PROTEIN H1-RELATED (1 of 5)
Lus10016389.g.BGIv1.0	11.0806	2.05143	0.672048	3.0525	0.00226941	0.0120343	up	PTHR10366//PTHR10366:SF332 - NAD DEPENDENT EPIMERASE/DEHYDRATASE // SUBFAMILY NOT NAMED (1 of 11)
Lus10017170.g.BGIv1.0	43.0807	2.03584	0.372693	5.46252	4.69428e-08	7.16133e-07	up	PF00314 - Thaumatin family (Thaumatin) (1 of 43)
Lus10029369.g.BGIv1.0	34.7253	2.02782	0.361871	5.60373	2.09793e-08	3.35519e-07	up	PF08659 - KR domain (KR) (1 of 39)
Lus10016896.g.BGIv1.0	15.9194	2.02626	0.554668	3.6531	0.00025909	0.00184024	up	PF07714//PF08263//PF13855 - Protein tyrosine kinase (Pkinase_Tyr) // Leucine rich repeat N-terminal domain (LRRNT_2) // Leucine rich repeat (LRR_8) (1 of 39)
Lus10006549.g.BGIv1.0	254.823	2.02592	0.135307	14.9727	1.10694e-50	2.03009e-48	up	PTHR31238:SF44 - GERMIN-LIKE PROTEIN SUBFAMILY 1 MEMBER 13-RELATED (1 of 14)
Lus10030751.g.BGIv1.0	116.673	2.02488	0.202845	9.98242	1.81969e-23	1.12259e-21	up	PF02458 - Transferase family (Transferase) (1 of 177)
Lus10003573.g.BGIv1.0	69.4554	2.02294	0.260517	7.76508	8.15936e-15	2.74514e-13	up	K00430 - peroxidase (E1.11.1.7) (1 of 94)
Lus10006547.g.BGIv1.0	34.4388	2.02093	0.36532	5.53194	3.16703e-08	4.95924e-07	up	PF02365 - No apical meristem (NAM) protein (NAM) (1 of 189)
Lus10027145.g.BGIv1.0	68.3412	2.00678	0.277569	7.22983	4.83614e-13	1.35096e-11	up	PF01657 - Salt stress response/antifungal (Stress-antifung) (1 of 114)
Lus10036881.g.BGIv1.0	65.1047	2.00615	0.263671	7.60852	2.77254e-14	8.84713e-13	up	KOG0266//KOG0645 - WD40 repeat-containing protein // WD40 repeat protein (1 of 1)
Lus10042486.g.BGIv1.0	63.1906	2.00415	0.295395	6.78463	1.1638e-11	2.8479e-10	up	PTHR24282:SF53 - CYTOCHROME P450-RELATED (1 of 5)
Lus10015276.g.BGIv1.0	10.1409	1.99669	0.711626	2.80581	0.00501899	0.0234417	up	PTHR22952:SF210 - DOG1 ALPHA SPLICE VARIANT (1 of 2)
Lus10029051.g.BGIv1.0	123.16	1.99391	0.206929	9.63573	5.64883e-22	3.2529e-20	up	PF05349 - GATA-type transcription activator, N-terminal (GATA-N) (1 of 1)
Lus10008695.g.BGIv1.0	138.778	1.99299	0.182023	10.9491	6.71051e-28	5.39158e-26	up	?
Lus10006550.g.BGIv1.0	362.035	1.99064	0.113165	17.5906	2.91001e-69	8.11556e-67	up	PTHR31238:SF44 - GERMIN-LIKE PROTEIN SUBFAMILY 1 MEMBER 13-RELATED (1 of 14)
Lus10017212.g.BGIv1.0	1335.71	1.98779	0.0644158	30.8587	4.27823e-209	6.87471e-206	up	PTHR23201:SF2 - GIBBERELLIN-REGULATED PROTEIN 1-RELATED (1 of 3)
Lus10020099.g.BGIv1.0	39.7398	1.98443	0.345123	5.74991	8.92906e-09	1.51794e-07	up	PTHR13683:SF267 - ASPARTYL PROTEASE FAMILY PROTEIN-RELATED (1 of 1)
Lus10026994.g.BGIv1.0	14.8528	1.98354	0.568997	3.48604	0.000490234	0.00320351	up	PTHR31752:SF2 - AUXIN EFFLUX CARRIER COMPONENT 8-RELATED (1 of 2)
Lus10033245.g.BGIv1.0	135.984	1.98064	0.199914	9.90743	3.86476e-23	2.33303e-21	up	2.4.1.242 - NDP-glucose--starch glucosyltransferase / Waxy protein (1 of 2)
Lus10010453.g.BGIv1.0	14.2483	1.98025	0.583161	3.39571	0.0006845	0.00430219	up	PTHR13935:SF41 - ACHAETE-SCUTE HOMOLOG 3 (1 of 4)
Lus10031235.g.BGIv1.0	140.501	1.97489	0.179108	11.0263	2.85346e-28	2.33714e-26	up	PTHR10353//PTHR10353:SF81 - GLYCOSYL HYDROLASE // SUBFAMILY NOT NAMED (1 of 3)
Lus10027719.g.BGIv1.0	18.6868	1.96443	0.500386	3.92583	8.64328e-05	0.000697769	up	PF03140 - Plant protein of unknown function (DUF247) (1 of 37)
Lus10033873.g.BGIv1.0	9.2553	1.95929	0.747894	2.61974	0.0087996	0.0370484	up	PTHR31529:SF2 - LOB DOMAIN-CONTAINING PROTEIN 17-RELATED (1 of 2)
Lus10034835.g.BGIv1.0	48.1659	1.95752	0.316662	6.18173	6.34027e-10	1.26375e-08	up	PF00106//PF13561 - short chain dehydrogenase (adh_short) // Enoyl-(Acyl carrier protein) reductase (adh_short_C2) (1 of 8)
Lus10010864.g.BGIv1.0	67.5194	1.95622	0.268125	7.29593	2.96604e-13	8.51098e-12	up	PTHR22595:SF37 - CHITINASE-RELATED (1 of 9)
Lus10028561.g.BGIv1.0	11.5599	1.95277	0.652448	2.99299	0.00276262	0.0142306	up	PTHR11785//PTHR11785:SF370 - AMINO ACID TRANSPORTER // SUBFAMILY NOT NAMED (1 of 3)
Lus10014109.g.BGIv1.0	44.6165	1.94846	0.318235	6.1227	9.20053e-10	1.80088e-08	up	PTHR32227:SF49 - BETA-1,3-GLUCANASE 1-RELATED (1 of 13)
Lus10000479.g.BGIv1.0	59.0982	1.94315	0.282206	6.8856	5.75455e-12	1.44592e-10	up	?
Lus10029184.g.BGIv1.0	111.388	1.94246	0.219295	8.85777	8.1631e-19	3.70745e-17	up	PF00407//PF07468 - Pathogenesis-related protein Bet v I family (Bet_v_1) // Agglutinin domain (Agglutinin) (1 of 5)
Lus10039481.g.BGIv1.0	31.9791	1.9332	0.386127	5.00664	5.53897e-07	7.14497e-06	up	PF00892 - EamA-like transporter family (EamA) (1 of 81)
Lus10026365.g.BGIv1.0	156.935	1.92126	0.357708	5.37101	7.82964e-08	1.15629e-06	up	PTHR12802:SF60 - PROTEIN REVEILLE 1-RELATED (1 of 3)
Lus10003099.g.BGIv1.0	19.0576	1.9205	0.48233	3.98172	6.84179e-05	0.000564628	up	K07573 - exosome complex component CSL4 (CSL4, EXOSC1) (1 of 3)
Lus10006552.g.BGIv1.0	276.472	1.91195	0.128205	14.9132	2.70614e-50	4.85738e-48	up	PTHR22595:SF62 - HEVEIN-LIKE PREPROPROTEIN (1 of 2)
Lus10010285.g.BGIv1.0	69.2679	1.91042	0.264216	7.23051	4.81187e-13	1.34529e-11	up	?
Lus10023204.g.BGIv1.0	25.9748	1.90455	0.415941	4.57889	4.67443e-06	5.05573e-05	up	?
Lus10024578.g.BGIv1.0	9.16887	1.89442	0.737824	2.56758	0.0102411	0.0418081	up	KOG0156 - Cytochrome P450 CYP2 subfamily (1 of 184)
Lus10008694.g.BGIv1.0	149.893	1.8932	0.187406	10.1021	5.40516e-24	3.46105e-22	up	?
Lus10001009.g.BGIv1.0	63.2704	1.89251	0.31377	6.0315	1.62444e-09	3.08653e-08	up	PTHR31692:SF10 - EXPANSIN-LIKE B1 (1 of 8)
Lus10002243.g.BGIv1.0	43.1488	1.89129	0.330125	5.72902	1.01013e-08	1.70519e-07	up	PTHR10795//PTHR10795:SF370 - PROPROTEIN CONVERTASE SUBTILISIN/KEXIN // SUBFAMILY NOT NAMED (1 of 33)
Lus10042531.g.BGIv1.0	9.45489	1.88915	0.732788	2.57803	0.0099366	0.0408218	up	PF02365 - No apical meristem (NAM) protein (NAM) (1 of 189)
Lus10009173.g.BGIv1.0	34.4353	1.88777	0.404382	4.66828	3.03732e-06	3.4074e-05	up	K02112 - F-type H+-transporting ATPase subunit beta (ATPF1B, atpD) (1 of 1)
Lus10020644.g.BGIv1.0	64.2189	1.88544	0.263947	7.14325	9.1151e-13	2.48256e-11	up	PTHR11972:SF57 - RESPIRATORY BURST OXIDASE HOMOLOG PROTEIN B (1 of 2)
Lus10024368.g.BGIv1.0	84.4895	1.85887	0.272043	6.83301	8.31529e-12	2.05869e-10	up	K01183 - chitinase (E3.2.1.14) (1 of 29)
Lus10015354.g.BGIv1.0	242.819	1.85482	0.137318	13.5075	1.41218e-41	1.90616e-39	up	PTHR23070:SF5 - AAA-TYPE ATPASE FAMILY PROTEIN-RELATED (1 of 7)
Lus10007186.g.BGIv1.0	1302.49	1.84847	0.502892	3.67567	0.000237225	0.0017016	up	?
Lus10005764.g.BGIv1.0	9.23387	1.84763	0.690377	2.67626	0.00744482	0.0323078	up	PTHR10108//PTHR10108:SF892 - METHYLTRANSFERASE // SUBFAMILY NOT NAMED (1 of 1)
Lus10030164.g.BGIv1.0	17.613	1.84698	0.525438	3.51513	0.00043954	0.00291	up	?
Lus10005903.g.BGIv1.0	27.7322	1.84025	0.439449	4.18762	2.81894e-05	0.000254754	up	PTHR30509 - P-HYDROXYBENZOIC ACID EFFLUX PUMP SUBUNIT-RELATED (1 of 5)
Lus10022756.g.BGIv1.0	17.8284	1.8327	0.522489	3.50764	0.000452108	0.00298501	up	PTHR24322:SF309 - SHORT-CHAIN DEHYDROGENASE REDUCTASE 2A (1 of 3)
Lus10000300.g.BGIv1.0	288.797	1.83052	0.541991	3.3774	0.000731755	0.00455508	up	?
Lus10023280.g.BGIv1.0	24.4646	1.82938	0.442245	4.13658	3.52516e-05	0.000312642	up	PTHR31403:SF13 - DAD1-LIKE ACYLHYDROLASE (1 of 7)
Lus10021010.g.BGIv1.0	31.4616	1.82834	0.394508	4.63449	3.57816e-06	3.96016e-05	up	?
Lus10040846.g.BGIv1.0	38.0616	1.82506	0.35767	5.10264	3.34951e-07	4.49063e-06	up	PTHR30509 - P-HYDROXYBENZOIC ACID EFFLUX PUMP SUBUNIT-RELATED (1 of 5)
Lus10024615.g.BGIv1.0	18.2306	1.82259	0.490714	3.71417	0.000203873	0.00148718	up	?
Lus10040073.g.BGIv1.0	20.4034	1.82062	0.482207	3.77559	0.000159628	0.0011989	up	?
Lus10025291.g.BGIv1.0	11.3596	1.82039	0.657537	2.7685	0.00563158	0.0256738	up	PTHR12542:SF38 - EXOCYST SUBUNIT EXO70 FAMILY PROTEIN-RELATED (1 of 2)
Lus10028056.g.BGIv1.0	10.4878	1.81986	0.651684	2.79255	0.00522949	0.024227	up	PTHR31636:SF25 - SCARECROW-LIKE PROTEIN 26 (1 of 2)
Lus10000298.g.BGIv1.0	13258.3	1.81497	0.591515	3.06834	0.00215254	0.0115115	up	?
Lus10025902.g.BGIv1.0	348.285	1.81367	0.115769	15.6663	2.57232e-55	5.49386e-53	up	1.14.14.1 - Unspecific monooxygenase / Xenobiotic monooxygenase (1 of 19)
Lus10030588.g.BGIv1.0	56.8635	1.81322	0.308306	5.88123	4.07241e-09	7.26339e-08	up	K02575 - MFS transporter, NNP family, nitrate/nitrite transporter (NRT, narK, nrtP, nasA) (1 of 4)
Lus10025697.g.BGIv1.0	12.8041	1.8057	0.59264	3.04688	0.00231229	0.012234	up	K13449 - pathogenesis-related protein 1 (PR1) (1 of 7)
Lus10011647.g.BGIv1.0	182.699	1.80399	0.596945	3.02204	0.00251073	0.0131092	up	?
Lus10024081.g.BGIv1.0	10.443	1.79822	0.681098	2.64018	0.00828618	0.0353141	up	PF00704//PF07714 - Glycosyl hydrolases family 18 (Glyco_hydro_18) // Protein tyrosine kinase (Pkinase_Tyr) (1 of 3)
Lus10017196.g.BGIv1.0	14.8483	1.79182	0.577301	3.10378	0.00191062	0.0104024	up	PTHR33649:SF4 - PAR1 PROTEIN (1 of 5)
Lus10000800.g.BGIv1.0	19.9368	1.79038	0.469248	3.81542	0.00013595	0.00103746	up	PTHR22849//PTHR22849:SF24 - WDSAM1 PROTEIN // SUBFAMILY NOT NAMED (1 of 3)
Lus10028657.g.BGIv1.0	11.2771	1.78543	0.640248	2.78865	0.00529284	0.0244499	up	PTHR10891//PTHR10891:SF530 - EF-HAND CALCIUM-BINDING DOMAIN CONTAINING PROTEIN // SUBFAMILY NOT NAMED (1 of 5)
Lus10037385.g.BGIv1.0	24.9603	1.78146	0.425161	4.19009	2.78845e-05	0.000252312	up	K13525 - transitional endoplasmic reticulum ATPase (VCP, CDC48) (1 of 5)
Lus10010257.g.BGIv1.0	37.5034	1.78055	0.35151	5.06542	4.07503e-07	5.38628e-06	up	?
Lus10012724.g.BGIv1.0	52.8462	1.77677	0.287701	6.17573	6.58565e-10	1.31188e-08	up	PTHR11624//PTHR11624:SF83 - DEHYDROGENASE RELATED // SUBFAMILY NOT NAMED (1 of 4)
Lus10030959.g.BGIv1.0	13.1309	1.7759	0.587669	3.02194	0.00251162	0.0131118	up	PTHR33493:SF6 - LEA D113 HOMOLOGUE TYPE2-RELATED (1 of 2)
Lus10019992.g.BGIv1.0	73.2961	1.77078	0.24721	7.16307	7.8889e-13	2.16608e-11	up	KOG0523 - Transketolase (1 of 1)
Lus10009911.g.BGIv1.0	675.675	1.77066	0.084846	20.8691	1.02272e-96	4.36857e-94	up	?
Lus10003128.g.BGIv1.0	79.5795	1.76694	0.240839	7.33662	2.19063e-13	6.36716e-12	up	PTHR31221:SF25 - WRKY TRANSCRIPTION FACTOR 45-RELATED (1 of 4)
Lus10041131.g.BGIv1.0	10.4266	1.76384	0.706646	2.49608	0.0125576	0.0493945	up	PTHR20961//PTHR20961:SF8 - GLYCOSYLTRANSFERASE // SUBFAMILY NOT NAMED (1 of 2)
Lus10018796.g.BGIv1.0	12.0589	1.7586	0.620662	2.83342	0.00460527	0.0218296	up	PTHR11157:SF11 - F25A4.4 (1 of 4)
Lus10029945.g.BGIv1.0	8.71269	1.75455	0.698133	2.5132	0.011964	0.0474136	up	PF07714//PF12819 - Protein tyrosine kinase (Pkinase_Tyr) // Carbohydrate-binding protein of the ER (Malectin_like) (1 of 11)
Lus10029186.g.BGIv1.0	129.857	1.75442	0.190575	9.20592	3.3875e-20	1.74255e-18	up	PF00407//PF07468 - Pathogenesis-related protein Bet v I family (Bet_v_1) // Agglutinin domain (Agglutinin) (1 of 5)
Lus10003338.g.BGIv1.0	87.7858	1.75221	0.239475	7.31691	2.53752e-13	7.32412e-12	up	PTHR22950//PTHR22950:SF233 - AMINO ACID TRANSPORTER // SUBFAMILY NOT NAMED (1 of 4)
Lus10002238.g.BGIv1.0	24.5926	1.75092	0.471693	3.71198	0.000205641	0.00149813	up	PTHR31964:SF10 - ADENINE NUCLEOTIDE ALPHA HYDROLASES-LIKE SUPERFAMILY PROTEIN (1 of 2)
Lus10000299.g.BGIv1.0	28966.9	1.7471	0.563805	3.09878	0.00194322	0.010556	up	?
Lus10016323.g.BGIv1.0	77.878	1.74665	0.250008	6.98637	2.82081e-12	7.31653e-11	up	PF14368 - Probable lipid transfer (LTP_2) (1 of 77)
Lus10035736.g.BGIv1.0	25.199	1.73905	0.41012	4.24034	2.23186e-05	0.000206546	up	K00079 - carbonyl reductase 1 (CBR1) (1 of 3)
Lus10010943.g.BGIv1.0	30.3349	1.73371	0.394044	4.39978	1.08359e-05	0.000107168	up	PF00201//PF01277 - UDP-glucoronosyl and UDP-glucosyl transferase (UDPGT) // Oleosin (Oleosin) (1 of 1)
Lus10008011.g.BGIv1.0	4026.44	1.73124	0.522129	3.31573	0.000914053	0.00552773	up	?
Lus10038553.g.BGIv1.0	28.0538	1.73016	0.428932	4.03365	5.49161e-05	0.000464563	up	PF00954//PF01453//PF07714//PF08276 - S-locus glycoprotein domain (S_locus_glycop) // D-mannose binding lectin (B_lectin) // Protein tyrosine kinase (Pkinase_Tyr) // PAN-like domain (PAN_2) (1 of 37)
Lus10023160.g.BGIv1.0	115.781	1.72319	0.195227	8.82659	1.0792e-18	4.84277e-17	up	PTHR10209:SF211 - 2-OXOGLUTARATE (2OG) AND FE(II)-DEPENDENT OXYGENASE SUPERFAMILY PROTEIN-RELATED (1 of 8)
Lus10042292.g.BGIv1.0	127.111	1.71735	0.200782	8.55331	1.19607e-17	4.98288e-16	up	PTHR12802:SF37 - PROTEIN REVEILLE 7-LIKE (1 of 1)
Lus10010445.g.BGIv1.0	12.5395	1.71691	0.62268	2.75729	0.0058283	0.0264296	up	K12617 - DNA topoisomerase 2-associated protein PAT1 (PATL1, PAT1) (1 of 6)
Lus10014401.g.BGIv1.0	87.1429	1.71329	0.223054	7.68106	1.57781e-14	5.17426e-13	up	2.4.1.203 - Trans-zeatin O-beta-D-glucosyltransferase / Zeatin O-glucosyltransferase (1 of 22)
Lus10007085.g.BGIv1.0	102.766	1.7089	0.206617	8.27087	1.32989e-16	5.08234e-15	up	PTHR11751:SF126 - TRYPTOPHAN AMINOTRANSFERASE-RELATED PROTEIN 3-RELATED (1 of 2)
Lus10030292.g.BGIv1.0	14.043	1.70808	0.553498	3.08597	0.00202892	0.0109528	up	3.1.1.11 - Pectinesterase / Pectin methylesterase (1 of 147)
Lus10027344.g.BGIv1.0	103.575	1.70483	0.213976	7.9674	1.62047e-15	5.80496e-14	up	PTHR31717:SF2 - CCT MOTIF FAMILY PROTEIN (1 of 4)
Lus10004895.g.BGIv1.0	1370.12	1.70148	0.497902	3.4173	0.000632461	0.00401777	up	K02703 - photosystem II P680 reaction center D1 protein (psbA) (1 of 1)
Lus10014541.g.BGIv1.0	34.3835	1.70111	0.391105	4.34949	1.36453e-05	0.000132392	up	PF07816 - Protein of unknown function (DUF1645) (DUF1645) (1 of 18)
Lus10009137.g.BGIv1.0	28.8821	1.69672	0.384871	4.40854	1.04069e-05	0.000103319	up	2.5.1.29 - Geranylgeranyl diphosphate synthase / Geranylgeranyl-PP synthetase (1 of 18)
Lus10026592.g.BGIv1.0	39.5127	1.69052	0.352366	4.79762	1.60564e-06	1.89382e-05	up	?
Lus10005523.g.BGIv1.0	32.1941	1.68929	0.370343	4.56143	5.08068e-06	5.44623e-05	up	PF05678 - VQ motif (VQ) (1 of 42)
Lus10038828.g.BGIv1.0	13.7464	1.67904	0.562486	2.98505	0.00283536	0.0145609	up	PF00560//PF07714//PF08263//PF13855 - Leucine Rich Repeat (LRR_1) // Protein tyrosine kinase (Pkinase_Tyr) // Leucine rich repeat N-terminal domain (LRRNT_2) // Leucine rich repeat (LRR_8) (1 of 20)
Lus10002741.g.BGIv1.0	821.032	1.67441	0.0780275	21.4592	3.74877e-102	1.83336e-99	up	PF14368 - Probable lipid transfer (LTP_2) (1 of 77)
Lus10036587.g.BGIv1.0	26.8481	1.67069	0.452426	3.69273	0.00022186	0.00160382	up	KOG4629 - Predicted mechanosensitive ion channel (1 of 6)
Lus10035201.g.BGIv1.0	17.3754	1.66785	0.536759	3.10727	0.00188823	0.0102951	up	PF11820 - Protein of unknown function (DUF3339) (DUF3339) (1 of 20)
Lus10034507.g.BGIv1.0	12.0346	1.66616	0.636056	2.61952	0.00880529	0.0370631	up	PTHR31374:SF34 - F6F9.11 PROTEIN-RELATED (1 of 4)
Lus10019721.g.BGIv1.0	20.1839	1.66606	0.467653	3.5626	0.000367204	0.00249222	up	PF03140 - Plant protein of unknown function (DUF247) (1 of 37)
Lus10003156.g.BGIv1.0	14.7846	1.66445	0.546904	3.0434	0.00233918	0.0123511	up	PF01453//PF07714//PF08276 - D-mannose binding lectin (B_lectin) // Protein tyrosine kinase (Pkinase_Tyr) // PAN-like domain (PAN_2) (1 of 4)
Lus10006692.g.BGIv1.0	58.2955	1.66345	0.280611	5.92795	3.06747e-09	5.56815e-08	up	PTHR11746//PTHR11746:SF99 - O-METHYLTRANSFERASE // SUBFAMILY NOT NAMED (1 of 22)
Lus10028589.g.BGIv1.0	1591.22	1.65896	0.0609203	27.2316	2.74759e-163	3.09058e-160	up	PF04554 - Extensin-like region (Extensin_2) (1 of 7)
Lus10022600.g.BGIv1.0	48.6269	1.65742	0.296623	5.58763	2.30194e-08	3.66929e-07	up	?
Lus10032035.g.BGIv1.0	110.138	1.65484	0.222344	7.4427	9.8646e-14	2.99623e-12	up	PTHR31517:SF7 - PEROXIDASE 55 (1 of 3)
Lus10032857.g.BGIv1.0	24.4207	1.65307	0.438879	3.76658	0.000165499	0.00123845	up	1.14.13.89 - Isoflavone 2'-hydroxylase / Isoflavone 2'-monooxygenase (1 of 14)
Lus10030563.g.BGIv1.0	16.9594	1.65258	0.534019	3.09461	0.00197069	0.0106777	up	PF00462//PF04784 - Glutaredoxin (Glutaredoxin) // Protein of unknown function, DUF547 (DUF547) (1 of 1)
Lus10024438.g.BGIv1.0	20.3914	1.65188	0.469838	3.51585	0.000438356	0.00290387	up	PTHR12542:SF38 - EXOCYST SUBUNIT EXO70 FAMILY PROTEIN-RELATED (1 of 2)
Lus10014498.g.BGIv1.0	71.8926	1.65143	0.276979	5.9623	2.48719e-09	4.57137e-08	up	PTHR23070:SF5 - AAA-TYPE ATPASE FAMILY PROTEIN-RELATED (1 of 7)
Lus10014397.g.BGIv1.0	42.1814	1.65106	0.335553	4.92042	8.63578e-07	1.07177e-05	up	K03457 - nucleobase:cation symporter-1, NCS1 family (TC.NCS1) (1 of 1)
Lus10032575.g.BGIv1.0	859.778	1.65043	0.077221	21.3729	2.39006e-101	1.15218e-98	up	PTHR33122:SF4 - BIFUNCTIONAL INHIBITOR/LIPID-TRANSFER PROTEIN/SEED STORAGE 2S ALBUMIN-LIKE PROTEIN (1 of 2)
Lus10025134.g.BGIv1.0	32.0789	1.64576	0.383483	4.29162	1.77377e-05	0.000167569	up	PF04654 - Protein of unknown function, DUF599 (DUF599) (1 of 15)
Lus10037894.g.BGIv1.0	22.1767	1.6391	0.454701	3.60479	0.000312404	0.00216426	up	KOG0508//KOG4412 - Ankyrin repeat protein // 26S proteasome regulatory complex, subunit PSMD10 (1 of 4)
Lus10010920.g.BGIv1.0	10.2583	1.63798	0.655042	2.50058	0.0123991	0.0489081	up	?
Lus10022221.g.BGIv1.0	214.96	1.6377	0.160337	10.2141	1.71452e-24	1.13444e-22	up	2.4.1.91 - Flavonol 3-O-glucosyltransferase / UDP-glucose flavonol 3-O-glucosyltransferase (1 of 4)
Lus10006157.g.BGIv1.0	19.7003	1.63421	0.4734	3.45208	0.000556278	0.00358647	up	PTHR11709:SF94 - LACCASE-15 (1 of 4)
Lus10028279.g.BGIv1.0	11.5403	1.63185	0.617061	2.64456	0.00817974	0.0348995	up	PTHR23155//PTHR23155:SF562 - LEUCINE-RICH REPEAT-CONTAINING PROTEIN // SUBFAMILY NOT NAMED (1 of 1)
Lus10032261.g.BGIv1.0	424.397	1.63113	0.111963	14.5685	4.45459e-48	7.59193e-46	up	PF00234 - Protease inhibitor/seed storage/LTP family (Tryp_alpha_amyl) (1 of 39)
Lus10043385.g.BGIv1.0	41.9909	1.62525	0.317964	5.11142	3.19748e-07	4.29876e-06	up	PTHR11362:SF13 - PROTEIN TERMINAL FLOWER 1 (1 of 8)
Lus10006611.g.BGIv1.0	22.0858	1.6217	0.454913	3.56485	0.000364059	0.00247436	up	PF08263//PF13855 - Leucine rich repeat N-terminal domain (LRRNT_2) // Leucine rich repeat (LRR_8) (1 of 35)
Lus10029033.g.BGIv1.0	87.0893	1.62111	0.22298	7.2702	3.58944e-13	1.01872e-11	up	4.2.3.19 - Ent-kaurene synthase / Ent-kaurene synthetase B (1 of 22)
Lus10037283.g.BGIv1.0	141.049	1.61702	0.181183	8.92478	4.46568e-19	2.08718e-17	up	PTHR19241:SF213 - ABC TRANSPORTER G FAMILY MEMBER 14 (1 of 5)
Lus10029204.g.BGIv1.0	24.1981	1.61561	0.42021	3.84477	0.000120666	0.00093306	up	?
Lus10037245.g.BGIv1.0	13.462	1.61267	0.557152	2.89449	0.00379771	0.0185649	up	PF05899 - Protein of unknown function (DUF861) (Cupin_3) (1 of 7)
Lus10015311.g.BGIv1.0	417.132	1.60945	0.110017	14.629	1.83332e-48	3.17258e-46	up	PTHR11746//PTHR11746:SF78 - O-METHYLTRANSFERASE // SUBFAMILY NOT NAMED (1 of 2)
Lus10003267.g.BGIv1.0	632.8	1.60794	0.0898249	17.9009	1.1608e-71	3.31958e-69	up	PTHR31238:SF44 - GERMIN-LIKE PROTEIN SUBFAMILY 1 MEMBER 13-RELATED (1 of 14)
Lus10016995.g.BGIv1.0	13.2951	1.6045	0.562501	2.85243	0.0043386	0.0207673	up	KOG0725 - Reductases with broad range of substrate specificities (1 of 96)
Lus10036695.g.BGIv1.0	14.3193	1.60376	0.589601	2.72007	0.00652674	0.0290025	up	PTHR10438:SF278 - THIOREDOXIN H7-RELATED (1 of 6)
Lus10041225.g.BGIv1.0	19.9602	1.59859	0.46731	3.42083	0.000624306	0.00397494	up	PTHR13683:SF268 - EUKARYOTIC ASPARTYL PROTEASE FAMILY PROTEIN (1 of 11)
Lus10002393.g.BGIv1.0	49.0914	1.59699	0.302944	5.27156	1.35272e-07	1.92525e-06	up	PTHR10795//PTHR10795:SF425 - PROPROTEIN CONVERTASE SUBTILISIN/KEXIN // SUBFAMILY NOT NAMED (1 of 13)
Lus10029554.g.BGIv1.0	15.1199	1.59118	0.567749	2.80261	0.00506908	0.0236266	up	PF00139//PF07714 - Legume lectin domain (Lectin_legB) // Protein tyrosine kinase (Pkinase_Tyr) (1 of 8)
Lus10034388.g.BGIv1.0	45.1662	1.58907	0.31997	4.96631	6.82386e-07	8.65356e-06	up	?
Lus10035620.g.BGIv1.0	733.565	1.58704	0.0831846	19.0785	3.80924e-81	1.28543e-78	up	PTHR22595//PTHR22595:SF60 - CHITINASE-RELATED // SUBFAMILY NOT NAMED (1 of 9)
Lus10003444.g.BGIv1.0	157.693	1.58282	0.165163	9.58342	9.38869e-22	5.35171e-20	up	PTHR32278:SF6 - F-BOX PROTEIN PP2-B1-RELATED (1 of 18)
Lus10000600.g.BGIv1.0	26.7071	1.58178	0.398846	3.96588	7.31254e-05	0.000599372	up	PTHR31403:SF2 - PHOSPHOLIPASE A1-IBETA2, CHLOROPLASTIC (1 of 4)
Lus10019806.g.BGIv1.0	108.146	1.57825	0.197606	7.98682	1.38462e-15	4.98654e-14	up	PF04450 - Peptidase of plants and bacteria (BSP) (1 of 38)
Lus10028377.g.BGIv1.0	507.923	1.57573	0.0933665	16.8769	6.65974e-64	1.74212e-61	up	PF00182//PF00187 - Chitinase class I (Glyco_hydro_19) // Chitin recognition protein (Chitin_bind_1) (1 of 3)
Lus10016962.g.BGIv1.0	42.4983	1.57369	0.332418	4.73405	2.20081e-06	2.53728e-05	up	PTHR31415:SF4 - HARPIN-INDUCED PROTEIN-LIKE-RELATED (1 of 3)
Lus10013593.g.BGIv1.0	23.7308	1.57075	0.418987	3.74892	0.000177596	0.00131569	up	PF13561 - Enoyl-(Acyl carrier protein) reductase (adh_short_C2) (1 of 87)
Lus10024673.g.BGIv1.0	35.1815	1.57063	0.377442	4.16124	3.16525e-05	0.000283169	up	PTHR11751:SF380 - 1-AMINOCYCLOPROPANE-1-CARBOXYLATE SYNTHASE 2-RELATED (1 of 4)
Lus10029455.g.BGIv1.0	424.469	1.56764	0.104576	14.9904	8.48431e-51	1.5645e-48	up	K03283 - heat shock 70kDa protein 1/8 (HSPA1_8) (1 of 21)
Lus10020783.g.BGIv1.0	31.0827	1.56664	0.380865	4.11337	3.89926e-05	0.00034239	up	PTHR31852:SF1 - LATE EMBRYOGENESIS ABUNDANT (LEA) HYDROXYPROLINE-RICH GLYCOPROTEIN-RELATED (1 of 2)
Lus10038059.g.BGIv1.0	11.9196	1.56626	0.604531	2.59087	0.00957337	0.0396273	up	PTHR31375:SF43 - GLYCOSIDE HYDROLASE FAMILY 28 PROTEIN / POLYGALACTURONASE (PECTINASE) FAMILY PROTEIN (1 of 2)
Lus10001626.g.BGIv1.0	73.6343	1.56358	0.243208	6.42897	1.2847e-10	2.82242e-09	up	?
Lus10013332.g.BGIv1.0	12.1423	1.56125	0.61292	2.54723	0.0108582	0.0439816	up	PTHR33209:SF1 - SERINE PROTEASE SPPA, CHLOROPLASTIC (1 of 8)
Lus10019989.g.BGIv1.0	104.596	1.56059	0.211343	7.38416	1.53424e-13	4.53752e-12	up	K12338 - anthocyanidin 3-O-glucoside 5-O-glucosyltransferase (UGT75C1) (1 of 3)
Lus10005612.g.BGIv1.0	13.2578	1.56012	0.602856	2.58788	0.00965689	0.039901	up	PF05055 - Protein of unknown function (DUF677) (DUF677) (1 of 11)
Lus10002324.g.BGIv1.0	176.242	1.55797	0.160883	9.68391	3.52954e-22	2.04647e-20	up	K17302 - coatomer, subunit beta' (COPB2, SEC27) (1 of 4)
Lus10006594.g.BGIv1.0	76.5256	1.55506	0.530128	2.93336	0.00335314	0.0167401	up	K02704 - photosystem II CP47 chlorophyll apoprotein (psbB) (1 of 2)
Lus10009968.g.BGIv1.0	110.978	1.5538	0.196127	7.92239	2.32981e-15	8.19807e-14	up	PTHR22595//PTHR22595:SF35 - CHITINASE-RELATED // SUBFAMILY NOT NAMED (1 of 2)
Lus10026081.g.BGIv1.0	15.6208	1.55377	0.530666	2.92797	0.00341184	0.0169912	up	?
Lus10010702.g.BGIv1.0	141.568	1.55339	0.188558	8.23825	1.74754e-16	6.62594e-15	up	PF00407//PF07468 - Pathogenesis-related protein Bet v I family (Bet_v_1) // Agglutinin domain (Agglutinin) (1 of 5)
Lus10031711.g.BGIv1.0	142.651	1.54717	0.185195	8.35429	6.58296e-17	2.58305e-15	up	3.1.1.11 - Pectinesterase / Pectin methylesterase (1 of 147)
Lus10010742.g.BGIv1.0	220.29	1.54227	0.164629	9.36817	7.38028e-21	3.99114e-19	up	PF04554 - Extensin-like region (Extensin_2) (1 of 7)
Lus10007083.g.BGIv1.0	65.0174	1.54152	0.267433	5.76414	8.20769e-09	1.40379e-07	up	PTHR10795:SF375 - SUBTILISIN-LIKE SERINE ENDOPEPTIDASE FAMILY PROTEIN-RELATED (1 of 4)
Lus10010278.g.BGIv1.0	197.043	1.53832	0.153407	10.0277	1.15208e-23	7.19945e-22	up	PTHR13683:SF268 - EUKARYOTIC ASPARTYL PROTEASE FAMILY PROTEIN (1 of 11)
Lus10010861.g.BGIv1.0	106.768	1.53791	0.209093	7.35516	1.90697e-13	5.57631e-12	up	K01183 - chitinase (E3.2.1.14) (1 of 29)
Lus10021391.g.BGIv1.0	43.734	1.53761	0.313483	4.90494	9.34573e-07	1.1489e-05	up	2.3.1.84 - Alcohol O-acetyltransferase / AATASE (1 of 62)
Lus10033429.g.BGIv1.0	66.4742	1.53644	0.262532	5.85241	4.84499e-09	8.54649e-08	up	2.7.11.1 - Non-specific serine/threonine protein kinase / Threonine-specific protein kinase (1 of 1714)
Lus10035775.g.BGIv1.0	30.0153	1.53627	0.388944	3.94985	7.82015e-05	0.000635575	up	PTHR10887//PTHR10887:SF372 - DNA2/NAM7 HELICASE FAMILY // SUBFAMILY NOT NAMED (1 of 4)
Lus10006536.g.BGIv1.0	19.0229	1.53576	0.545552	2.81506	0.00487682	0.0228821	up	PTHR31238:SF44 - GERMIN-LIKE PROTEIN SUBFAMILY 1 MEMBER 13-RELATED (1 of 14)
Lus10030078.g.BGIv1.0	15.0593	1.53454	0.533765	2.87493	0.00404112	0.0195397	up	PTHR22595//PTHR22595:SF56 - CHITINASE-RELATED // SUBFAMILY NOT NAMED (1 of 1)
Lus10018894.g.BGIv1.0	280.626	1.52608	0.130704	11.6758	1.69391e-31	1.58781e-29	up	PF04554 - Extensin-like region (Extensin_2) (1 of 7)
Lus10019460.g.BGIv1.0	89.589	1.5244	0.214208	7.11647	1.10726e-12	2.99156e-11	up	PF00067 - Cytochrome P450 (p450) (1 of 443)
Lus10006621.g.BGIv1.0	38.7331	1.52114	0.329611	4.61494	3.93205e-06	4.31362e-05	up	PTHR14154:SF5 - EARLY LIGHT-INDUCED PROTEIN 1, CHLOROPLASTIC-RELATED (1 of 4)
Lus10032087.g.BGIv1.0	14.289	1.52079	0.561863	2.7067	0.00679558	0.0299918	up	1.13.11.12 - Linoleate 13S-lipoxygenase / Lipoxidase (1 of 18)
Lus10031971.g.BGIv1.0	50.797	1.51875	0.286121	5.30809	1.10783e-07	1.59896e-06	up	PF01575//PF06522 - MaoC like domain (MaoC_dehydratas) // NADH-ubiquinone reductase complex 1 MLRQ subunit (B12D) (1 of 1)
Lus10019882.g.BGIv1.0	365.031	1.51462	0.107585	14.0783	5.16039e-45	7.87952e-43	up	PTHR23024:SF157 - CARBOXYLESTERASE 12-RELATED (1 of 5)
Lus10034207.g.BGIv1.0	1019.24	1.51428	0.066464	22.7834	6.69386e-115	3.82855e-112	up	PTHR31388:SF24 - PEROXIDASE 52 (1 of 2)
Lus10018893.g.BGIv1.0	130.792	1.51413	0.183151	8.2671	1.3726e-16	5.23965e-15	up	PF04554 - Extensin-like region (Extensin_2) (1 of 7)
Lus10041713.g.BGIv1.0	103.952	1.51303	0.213633	7.08239	1.41692e-12	3.80382e-11	up	K12356 - coniferyl-alcohol glucosyltransferase (UGT72E) (1 of 4)
Lus10034479.g.BGIv1.0	36.6115	1.51175	0.334794	4.51546	6.31803e-06	6.59251e-05	up	PTHR21495:SF80 - DIRIGENT PROTEIN 23 (1 of 12)
Lus10032825.g.BGIv1.0	32.1674	1.51071	0.392946	3.84456	0.00012077	0.000933649	up	K01601 - ribulose-bisphosphate carboxylase large chain (rbcL) (1 of 1)
Lus10014262.g.BGIv1.0	13.2337	1.5084	0.567307	2.65888	0.00784008	0.0337195	up	PTHR23201 - EXTENSIN, PROLINE-RICH PROTEIN (1 of 20)
Lus10022283.g.BGIv1.0	19.1622	1.50825	0.505912	2.98125	0.00287078	0.0147114	up	?
Lus10024600.g.BGIv1.0	36.5597	1.50769	0.371826	4.05481	5.01747e-05	0.000428637	up	PTHR31374:SF56 - AUXIN-REGULATED PROTEIN-RELATED (1 of 8)
Lus10042139.g.BGIv1.0	104.398	1.50549	0.205855	7.31332	2.60615e-13	7.5102e-12	up	PF14009 - Domain of unknown function (DUF4228) (DUF4228) (1 of 47)
Lus10007432.g.BGIv1.0	12.064	1.50467	0.591897	2.54211	0.0110187	0.0444836	up	PTHR24198:SF85 - IKB-1 (1 of 4)
Lus10021047.g.BGIv1.0	46.9884	1.50458	0.353957	4.25074	2.13063e-05	0.000197958	up	1.14.19.6//1.3.1.35 - Delta(12)-fatty-acid desaturase / Oleoyl-CoA Delta(12) desaturase (1 of 11)
Lus10033776.g.BGIv1.0	22.2041	1.50442	0.437465	3.43894	0.000583991	0.00375081	up	PTHR27007:SF24 - L-TYPE LECTIN-DOMAIN CONTAINING RECEPTOR KINASE IX.1-RELATED (1 of 23)
Lus10041223.g.BGIv1.0	206.094	1.49801	0.157759	9.49553	2.19096e-21	1.22407e-19	up	PTHR13683:SF268 - EUKARYOTIC ASPARTYL PROTEASE FAMILY PROTEIN (1 of 11)
Lus10039314.g.BGIv1.0	1142.9	1.49724	0.0628424	23.8253	1.82789e-125	1.23364e-122	up	PTHR31707:SF55 - PECTINESTERASE 2-RELATED (1 of 6)
Lus10040936.g.BGIv1.0	12.0699	1.49625	0.595008	2.51468	0.0119141	0.0472658	up	PTHR11709:SF83 - LACCASE-1 (1 of 3)
Lus10008598.g.BGIv1.0	49.786	1.49529	0.288388	5.185	2.16011e-07	2.9862e-06	up	PTHR19317//PTHR19317:SF15 - PRENYLATED RAB ACCEPTOR 1-RELATED // SUBFAMILY NOT NAMED (1 of 4)
Lus10036436.g.BGIv1.0	92.3226	1.49451	0.215391	6.93859	3.96026e-12	1.01242e-10	up	PTHR10551 - FASCIN (1 of 2)
Lus10033767.g.BGIv1.0	17.1955	1.48596	0.505608	2.93896	0.00329311	0.0165022	up	PTHR31238:SF44 - GERMIN-LIKE PROTEIN SUBFAMILY 1 MEMBER 13-RELATED (1 of 14)
Lus10038249.g.BGIv1.0	19.3549	1.48363	0.499803	2.96843	0.00299325	0.0152441	up	PTHR11017//PTHR11017:SF162 - LEUCINE-RICH REPEAT-CONTAINING PROTEIN // SUBFAMILY NOT NAMED (1 of 62)
Lus10021618.g.BGIv1.0	2870.11	1.48289	0.546886	2.71151	0.00669772	0.0296296	up	?
Lus10031100.g.BGIv1.0	148.644	1.48117	0.166967	8.87103	7.24705e-19	3.30922e-17	up	1.1.1.330 - Very-long-chain 3-oxoacyl-CoA reductase / Very-long-chain beta-ketoacyl-CoA reductase (1 of 30)
Lus10024518.g.BGIv1.0	39.3839	1.48116	0.353842	4.18594	2.83986e-05	0.000256508	up	1.14.13.121 - Premnaspirodiene oxygenase / Hyoscymus muticus premnaspirodiene oxygenase (1 of 43)
Lus10035020.g.BGIv1.0	22.9734	1.48009	0.45178	3.27614	0.00105236	0.00626092	up	3.2.1.177//3.2.1.20 - Alpha-D-xyloside xylohydrolase / Alpha-xylosidase // Alpha-glucosidase / Maltase-glucoamylase (1 of 2)
Lus10012478.g.BGIv1.0	111.531	1.47875	0.200034	7.39248	1.44114e-13	4.27717e-12	up	PTHR10334:SF223 - F2J10.6 PROTEIN-RELATED (1 of 11)
Lus10022329.g.BGIv1.0	179.835	1.47636	0.166239	8.88093	6.63058e-19	3.0442e-17	up	PTHR22950:SF235 - LYSINE HISTIDINE TRANSPORTER 1-RELATED (1 of 7)
Lus10039191.g.BGIv1.0	31.432	1.47497	0.39476	3.73636	0.000186704	0.00137473	up	PTHR16007//PTHR16007:SF29 - EPIDIDYMAL MEMBRANE PROTEIN E9-RELATED // SUBFAMILY NOT NAMED (1 of 2)
Lus10036003.g.BGIv1.0	34.1958	1.47343	0.356932	4.12803	3.65887e-05	0.000322963	up	PTHR20961:SF5 - GENOMIC DNA, CHROMOSOME 3, P1 CLONE: MRC8 (1 of 8)
Lus10031133.g.BGIv1.0	43.4918	1.47331	0.318745	4.62224	3.7962e-06	4.17681e-05	up	PTHR31080:SF9 - INVERTASE/PECTIN METHYLESTERASE INHIBITOR FAMILY PROTEIN / DC 1.2-LIKE PROTEIN-RELATED (1 of 4)
Lus10012145.g.BGIv1.0	78.0535	1.47321	0.237418	6.20513	5.46528e-10	1.09974e-08	up	1.23.1.3 - (-)-pinoresinol reductase / Pinoresinol/lariciresinol reductase (1 of 2)
Lus10033372.g.BGIv1.0	40.3942	1.47306	0.327469	4.49831	6.8497e-06	7.08594e-05	up	?
Lus10015283.g.BGIv1.0	25.8734	1.47068	0.407292	3.61086	0.000305181	0.00212118	up	1.14.12.20 - Pheophorbide a oxygenase / Pheide a oxygenase (1 of 17)
Lus10019867.g.BGIv1.0	13.8818	1.46931	0.541585	2.71297	0.00666822	0.0295301	up	PTHR31722:SF5 - EMB (1 of 4)
Lus10004163.g.BGIv1.0	715.9	1.4693	0.0804896	18.2546	1.90222e-74	5.78292e-72	up	PTHR31388:SF8 - PEROXIDASE 53-RELATED (1 of 1)
Lus10031596.g.BGIv1.0	28.1308	1.46843	0.38733	3.79117	0.000149939	0.00113446	up	PF00069//PF00954//PF01453//PF08276 - Protein kinase domain (Pkinase) // S-locus glycoprotein domain (S_locus_glycop) // D-mannose binding lectin (B_lectin) // PAN-like domain (PAN_2) (1 of 13)
Lus10020023.g.BGIv1.0	23.9159	1.46409	0.426367	3.43387	0.00059503	0.00381275	up	?
Lus10043215.g.BGIv1.0	27.4542	1.46387	0.432263	3.38653	0.000707813	0.00442563	up	?
Lus10032787.g.BGIv1.0	53.9428	1.46284	0.293636	4.98181	6.29936e-07	8.04587e-06	up	PF13041 - PPR repeat family (PPR_2) (1 of 719)
Lus10024715.g.BGIv1.0	18.6178	1.45989	0.492653	2.96332	0.00304342	0.0154552	up	PTHR21495//PTHR21495:SF70 - NUCLEOPORIN-RELATED // SUBFAMILY NOT NAMED (1 of 3)
Lus10001322.g.BGIv1.0	180.012	1.45575	0.160867	9.04938	1.43779e-19	7.01128e-18	up	1.1.1.267//2.2.1.7 - 1-deoxy-D-xylulose-5-phosphate reductoisomerase / DXP-reductoisomerase // 1-deoxy-D-xylulose-5-phosphate synthase / DXP-synthase (1 of 5)
Lus10028685.g.BGIv1.0	12.437	1.45484	0.583164	2.49473	0.0126053	0.0495483	up	PTHR22835//PTHR22835:SF230 - ZINC FINGER FYVE DOMAIN CONTAINING PROTEIN // SUBFAMILY NOT NAMED (1 of 3)
Lus10004808.g.BGIv1.0	29.1449	1.45115	0.382842	3.79047	0.000150363	0.00113691	up	PTHR10209:SF134 - 2-OXOGLUTARATE (2OG) AND FE(II)-DEPENDENT OXYGENASE-LIKE PROTEIN (1 of 4)
Lus10023858.g.BGIv1.0	24.5265	1.44818	0.425893	3.40033	0.000673057	0.00424084	up	PTHR31388:SF35 - PEROXIDASE 10 (1 of 2)
Lus10023057.g.BGIv1.0	124.594	1.44582	0.183463	7.8807	3.25542e-15	1.13721e-13	up	PTHR13301:SF51 - CELLULOSE SYNTHASE-LIKE PROTEIN G1-RELATED (1 of 6)
Lus10024120.g.BGIv1.0	117.349	1.44473	0.188146	7.67881	1.60575e-14	5.25059e-13	up	K04121 - ent-kaurene synthase (E4.2.3.19) (1 of 3)
Lus10042344.g.BGIv1.0	169.103	1.44396	0.162126	8.9064	5.27175e-19	2.44698e-17	up	PTHR11206//PTHR11206:SF181 - MULTIDRUG RESISTANCE PROTEIN // SUBFAMILY NOT NAMED (1 of 4)
Lus10031140.g.BGIv1.0	28.3071	1.44076	0.412651	3.49147	0.000480367	0.00314941	up	PTHR31707:SF45 - PECTINESTERASE/PECTINESTERASE INHIBITOR 33-RELATED (1 of 8)
Lus10008597.g.BGIv1.0	19.0754	1.44072	0.462879	3.11253	0.00185494	0.0101566	up	PTHR27007:SF13 - L-TYPE LECTIN-DOMAIN CONTAINING RECEPTOR KINASE IV.1-RELATED (1 of 4)
Lus10026502.g.BGIv1.0	180.038	1.44024	0.161287	8.92968	4.2725e-19	2.00244e-17	up	PTHR33597:SF4 - CONSERVED PEPTIDE UPSTREAM OPEN READING FRAME 47 (1 of 2)
Lus10009253.g.BGIv1.0	31.4945	1.4392	0.370503	3.88445	0.00010256	0.000810133	up	PF01357//PF03330 - Pollen allergen (Pollen_allerg_1) // Rare lipoprotein A (RlpA)-like double-psi beta-barrel (DPBB_1) (1 of 57)
Lus10025583.g.BGIv1.0	16.8381	1.43398	0.518718	2.76448	0.0057014	0.0259501	up	?
Lus10030577.g.BGIv1.0	106.599	1.43103	0.205882	6.95073	3.63399e-12	9.31124e-11	up	3.2.1.21 - Beta-glucosidase / Gentobiase (1 of 57)
Lus10041863.g.BGIv1.0	44.1275	1.43068	0.312981	4.57114	4.85073e-06	5.22131e-05	up	PTHR10366//PTHR10366:SF400 - NAD DEPENDENT EPIMERASE/DEHYDRATASE // SUBFAMILY NOT NAMED (1 of 2)
Lus10019461.g.BGIv1.0	168.14	1.42853	0.177145	8.06416	7.37432e-16	2.69314e-14	up	1.14.13.68 - 4-hydroxyphenylacetaldehyde oxime monooxygenase / Cytochrome P450-II-dependent monooxygenase (1 of 3)
Lus10030220.g.BGIv1.0	35.6761	1.42705	0.35308	4.04172	5.30613e-05	0.00045068	up	PTHR23070:SF13 - P-LOOP CONTAINING NUCLEOSIDE TRIPHOSPHATE HYDROLASES SUPERFAMILY PROTEIN (1 of 6)
Lus10003140.g.BGIv1.0	148.976	1.42655	0.200299	7.12213	1.06273e-12	2.87585e-11	up	K14488 - SAUR family protein (SAUR) (1 of 68)
Lus10029341.g.BGIv1.0	111.972	1.42541	0.202057	7.05451	1.73215e-12	4.59162e-11	up	PTHR23024:SF102 - CARBOXYLESTERASE 15-RELATED (1 of 5)
Lus10032306.g.BGIv1.0	21.457	1.42193	0.435694	3.26359	0.0011001	0.00650366	up	PF00560//PF07714//PF08263//PF13855 - Leucine Rich Repeat (LRR_1) // Protein tyrosine kinase (Pkinase_Tyr) // Leucine rich repeat N-terminal domain (LRRNT_2) // Leucine rich repeat (LRR_8) (1 of 20)
Lus10023418.g.BGIv1.0	1538.94	1.42158	0.0589688	24.1074	2.09122e-128	1.44017e-125	up	K03283 - heat shock 70kDa protein 1/8 (HSPA1_8) (1 of 21)
Lus10029062.g.BGIv1.0	608.227	1.41735	0.0860636	16.4686	6.16315e-61	1.46462e-58	up	PTHR31388:SF24 - PEROXIDASE 52 (1 of 2)
Lus10039682.g.BGIv1.0	202.139	1.41714	0.150314	9.42787	4.18501e-21	2.29631e-19	up	1.3.3.8 - Tetrahydroberberine oxidase / THB oxidase (1 of 42)
Lus10005362.g.BGIv1.0	32.7088	1.4159	0.366262	3.86581	0.000110722	0.000864984	up	2.3.1.115 - Isoflavone-7-O-beta-glucoside 6''-O-malonyltransferase / Flavone/flavonol 7-O-beta-D-glucoside malonyltransferase (1 of 15)
Lus10034244.g.BGIv1.0	48.5447	1.41426	0.304019	4.65187	3.28939e-06	3.66701e-05	up	PF03106 - WRKY DNA -binding domain (WRKY) (1 of 108)
Lus10024343.g.BGIv1.0	38.6014	1.4134	0.3423	4.12913	3.64135e-05	0.0003215	up	PF00069//PF00153//PF00954//PF01453//PF08276 - Protein kinase domain (Pkinase) // Mitochondrial carrier protein (Mito_carr) // S-locus glycoprotein domain (S_locus_glycop) // D-mannose binding lectin (B_lectin) // PAN-like domain (PAN_2) (1 of 1)
Lus10014347.g.BGIv1.0	16.9989	1.41269	0.499204	2.82989	0.00465635	0.0220345	up	3.1.1.5 - Lysophospholipase / Phospholipase B (1 of 6)
Lus10029368.g.BGIv1.0	15.7769	1.41258	0.543457	2.59925	0.0093429	0.0388032	up	KOG0725 - Reductases with broad range of substrate specificities (1 of 96)
Lus10001550.g.BGIv1.0	161.72	1.41204	0.454232	3.10863	0.00187955	0.0102611	up	?
Lus10002330.g.BGIv1.0	45.8933	1.40353	0.364676	3.8487	0.000118746	0.000919896	up	K02950 - small subunit ribosomal protein S12 (RP-S12, MRPS12, rpsL) (1 of 1)
Lus10006984.g.BGIv1.0	87.8086	1.40058	0.239763	5.84154	5.1722e-09	9.08095e-08	up	1.1.1.267//2.2.1.7 - 1-deoxy-D-xylulose-5-phosphate reductoisomerase / DXP-reductoisomerase // 1-deoxy-D-xylulose-5-phosphate synthase / DXP-synthase (1 of 5)
Lus10029409.g.BGIv1.0	47.6673	1.40054	0.298868	4.68615	2.78396e-06	3.14196e-05	up	PTHR11615:SF116 - CASPARIAN STRIP MEMBRANE PROTEIN 1-RELATED (1 of 5)
Lus10039761.g.BGIv1.0	28.5228	1.39617	0.381409	3.66055	0.000251671	0.00179549	up	PF12609 - Wound-induced protein (DUF3774) (1 of 27)
Lus10011786.g.BGIv1.0	26.0077	1.39572	0.414673	3.36582	0.000763164	0.00472532	up	PTHR11654:SF73 - PROTEIN NRT1/ PTR FAMILY 5.2-RELATED (1 of 2)
Lus10042593.g.BGIv1.0	355.253	1.39557	0.109171	12.7834	2.03064e-37	2.38759e-35	up	K04120 - ent-copalyl diphosphate synthase (E5.5.1.13) (1 of 2)
Lus10032671.g.BGIv1.0	25.2333	1.39447	0.436105	3.19755	0.00138602	0.00791527	up	PTHR31852:SF43 - LATE EMBRYOGENESIS ABUNDANT HYDROXYPROLINE-RICH GLYCOPROTEIN (1 of 6)
Lus10029950.g.BGIv1.0	126.516	1.3872	0.191665	7.23763	4.56586e-13	1.28396e-11	up	PTHR11969:SF26 - TRANSCRIPTION FACTOR BHLH99 (1 of 2)
Lus10016111.g.BGIv1.0	26.2866	1.38587	0.421839	3.28531	0.00101871	0.00608755	up	?
Lus10025975.g.BGIv1.0	16.8799	1.38537	0.513172	2.69962	0.00694197	0.030534	up	K09755 - ferulate-5-hydroxylase (CYP84A, F5H) (1 of 4)
Lus10022246.g.BGIv1.0	69.0785	1.38394	0.256905	5.38695	7.16614e-08	1.06389e-06	up	PTHR24078:SF166 - LD21896P (1 of 1)
Lus10022047.g.BGIv1.0	206.981	1.37923	0.149383	9.23288	2.63456e-20	1.37621e-18	up	K04120 - ent-copalyl diphosphate synthase (E5.5.1.13) (1 of 2)
Lus10023743.g.BGIv1.0	35.0888	1.37922	0.346263	3.98315	6.80083e-05	0.00056166	up	PTHR11654:SF73 - PROTEIN NRT1/ PTR FAMILY 5.2-RELATED (1 of 2)
Lus10017208.g.BGIv1.0	120.331	1.3789	0.184105	7.48974	6.90105e-14	2.12672e-12	up	PTHR11260:SF303 - GLUTATHIONE S-TRANSFERASE U1-RELATED (1 of 16)
Lus10012064.g.BGIv1.0	36.9991	1.37843	0.347302	3.96896	7.21864e-05	0.000592972	up	?
Lus10016396.g.BGIv1.0	16.8031	1.37642	0.533159	2.58164	0.0098333	0.0404911	up	PF03140 - Plant protein of unknown function (DUF247) (1 of 37)
Lus10011829.g.BGIv1.0	46.2692	1.37622	0.299065	4.60176	4.18942e-06	4.56628e-05	up	K14516 - ethylene-responsive transcription factor 1 (ERF1) (1 of 7)
Lus10001640.g.BGIv1.0	86.633	1.37605	0.22129	6.21831	5.02525e-10	1.01665e-08	up	PTHR11260:SF303 - GLUTATHIONE S-TRANSFERASE U1-RELATED (1 of 16)
Lus10014873.g.BGIv1.0	118.156	1.37389	0.189179	7.26237	3.80359e-13	1.07408e-11	up	?
Lus10019932.g.BGIv1.0	906.974	1.3737	0.0714679	19.2212	2.46128e-82	8.83572e-80	up	PTHR33597:SF4 - CONSERVED PEPTIDE UPSTREAM OPEN READING FRAME 47 (1 of 2)
Lus10029787.g.BGIv1.0	151.079	1.36997	0.364962	3.75373	0.000174219	0.00129523	up	KOG0156 - Cytochrome P450 CYP2 subfamily (1 of 184)
Lus10006593.g.BGIv1.0	24.8788	1.36509	0.445965	3.06098	0.00220617	0.0117507	up	K02704 - photosystem II CP47 chlorophyll apoprotein (psbB) (1 of 2)
Lus10040818.g.BGIv1.0	18.8248	1.36477	0.476079	2.86669	0.00414792	0.0199845	up	PTHR13068:SF28 - MITOCHONDRIAL TRANSCRIPTION TERMINATION FACTOR FAMILY PROTEIN-RELATED (1 of 12)
Lus10030449.g.BGIv1.0	416.247	1.36469	0.10523	12.9686	1.84347e-38	2.25391e-36	up	PF01357//PF03330 - Pollen allergen (Pollen_allerg_1) // Rare lipoprotein A (RlpA)-like double-psi beta-barrel (DPBB_1) (1 of 57)
Lus10035625.g.BGIv1.0	56.8747	1.36392	0.269807	5.05516	4.30033e-07	5.65308e-06	up	PTHR22595//PTHR22595:SF60 - CHITINASE-RELATED // SUBFAMILY NOT NAMED (1 of 9)
Lus10010866.g.BGIv1.0	107.014	1.36377	0.198916	6.85602	7.08051e-12	1.76986e-10	up	PTHR22595:SF37 - CHITINASE-RELATED (1 of 9)
Lus10008611.g.BGIv1.0	314.457	1.36261	0.130752	10.4213	1.98158e-25	1.37026e-23	up	4.2.3.22 - Germacradienol synthase / Germacradienol/germacrene-D synthase (1 of 9)
Lus10020994.g.BGIv1.0	832.953	1.3625	0.0747009	18.2394	2.51107e-74	7.56573e-72	up	PTHR31388:SF35 - PEROXIDASE 10 (1 of 2)
Lus10033889.g.BGIv1.0	98.0938	1.36121	0.214266	6.35291	2.1128e-10	4.49536e-09	up	PTHR10641//PTHR10641:SF523 - MYB-LIKE DNA-BINDING PROTEIN MYB // SUBFAMILY NOT NAMED (1 of 8)
Lus10028060.g.BGIv1.0	19.6492	1.35967	0.469011	2.89902	0.00374335	0.0183524	up	PF00931//PF01582 - NB-ARC domain (NB-ARC) // TIR domain (TIR) (1 of 22)
Lus10033268.g.BGIv1.0	56.1956	1.35644	0.281735	4.81459	1.47504e-06	1.7576e-05	up	PTHR19139:SF102 - AQUAPORIN NIP5-1-RELATED (1 of 3)
Lus10042216.g.BGIv1.0	24.4586	1.35534	0.418686	3.23714	0.00120735	0.00703659	up	PTHR19317//PTHR19317:SF15 - PRENYLATED RAB ACCEPTOR 1-RELATED // SUBFAMILY NOT NAMED (1 of 4)
Lus10000453.g.BGIv1.0	326.842	1.34766	0.116592	11.5588	6.66331e-31	6.14353e-29	up	PTHR22595//PTHR22595:SF61 - CHITINASE-RELATED // SUBFAMILY NOT NAMED (1 of 1)
Lus10025255.g.BGIv1.0	154.756	1.34722	0.165369	8.14676	3.73797e-16	1.39533e-14	up	K00430 - peroxidase (E1.11.1.7) (1 of 94)
Lus10027560.g.BGIv1.0	46.6796	1.34617	0.30335	4.43767	9.09397e-06	9.15501e-05	up	3.2.1.17 - Lysozyme / Muramidase (1 of 2)
Lus10021203.g.BGIv1.0	46.5824	1.34584	0.314378	4.28095	1.86097e-05	0.000174877	up	PTHR10209:SF122 - 1-AMINOCYCLOPROPANE-1-CARBOXYLATE OXIDASE HOMOLOG 10-RELATED (1 of 27)
Lus10002123.g.BGIv1.0	14.1867	1.34221	0.53284	2.51898	0.0117694	0.0468128	up	K01184 - polygalacturonase (E3.2.1.15) (1 of 6)
Lus10015133.g.BGIv1.0	74.3997	1.34073	0.237785	5.63841	1.7163e-08	2.78981e-07	up	PF03595 - Voltage-dependent anion channel (SLAC1) (1 of 7)
Lus10009156.g.BGIv1.0	78.0738	1.33929	0.238075	5.62551	1.84963e-08	2.98354e-07	up	?
Lus10002739.g.BGIv1.0	52.4796	1.33738	0.283874	4.71119	2.46272e-06	2.80949e-05	up	PF04043 - Plant invertase/pectin methylesterase inhibitor (PMEI) (1 of 150)
Lus10011058.g.BGIv1.0	282.663	1.3365	0.123329	10.8369	2.30171e-27	1.78145e-25	up	PTHR11654:SF121 - PROTEIN NRT1/ PTR FAMILY 7.3 (1 of 9)
Lus10013150.g.BGIv1.0	308.017	1.33584	0.117376	11.3808	5.21066e-30	4.6272e-28	up	1.14.13.21 - Flavonoid 3'-monooxygenase / Flavonoid 3'-hydroxylase (1 of 14)
Lus10027598.g.BGIv1.0	467.486	1.33578	0.0995038	13.4244	4.35232e-41	5.67062e-39	up	K00487 - trans-cinnamate 4-monooxygenase (CYP73A) (1 of 3)
Lus10008564.g.BGIv1.0	918.536	1.32942	0.0728238	18.2552	1.87977e-74	5.76663e-72	up	PTHR10209//PTHR10209:SF103 - OXIDOREDUCTASE, 2OG-FE II OXYGENASE FAMILY PROTEIN // SUBFAMILY NOT NAMED (1 of 3)
Lus10030052.g.BGIv1.0	44.2086	1.32887	0.319832	4.15491	3.25413e-05	0.000290197	up	PF03386 - Early nodulin 93 ENOD93 protein (ENOD93) (1 of 5)
Lus10003445.g.BGIv1.0	57.616	1.3256	0.297275	4.45915	8.22857e-06	8.35609e-05	up	PTHR32278:SF6 - F-BOX PROTEIN PP2-B1-RELATED (1 of 18)
Lus10027912.g.BGIv1.0	19.3197	1.32133	0.50829	2.59955	0.00933454	0.038778	up	PF07816 - Protein of unknown function (DUF1645) (DUF1645) (1 of 18)
Lus10005953.g.BGIv1.0	603.023	1.31921	0.0858091	15.3738	2.45374e-53	4.81404e-51	up	K03283 - heat shock 70kDa protein 1/8 (HSPA1_8) (1 of 21)
Lus10029766.g.BGIv1.0	41.4574	1.31837	0.330666	3.98702	6.69097e-05	0.000553806	up	K15378 - solute carrier family 45, member 1/2/4 (SLC45A1_2_4) (1 of 6)
Lus10041733.g.BGIv1.0	37.4271	1.31145	0.358215	3.66107	0.000251163	0.00179224	up	?
Lus10019348.g.BGIv1.0	368.335	1.31053	0.105128	12.466	1.14435e-35	1.27027e-33	up	PTHR10015:SF166 - HEAT STRESS TRANSCRIPTION FACTOR B-1 (1 of 2)
Lus10025901.g.BGIv1.0	57.1185	1.31007	0.291212	4.49869	6.83746e-06	7.0825e-05	up	KOG0156 - Cytochrome P450 CYP2 subfamily (1 of 184)
Lus10008392.g.BGIv1.0	483.98	1.30637	0.0967764	13.4989	1.58806e-41	2.13502e-39	up	PTHR31953:SF16 - BETA-FRUCTOFURANOSIDASE, INSOLUBLE ISOENZYME CWINV1-RELATED (1 of 6)
Lus10027850.g.BGIv1.0	51.7916	1.30481	0.304722	4.28197	1.85245e-05	0.000174271	up	PTHR11926:SF145 - UDP-GLYCOSYLTRANSFERASE 91C1 (1 of 1)
Lus10017089.g.BGIv1.0	49.0636	1.30428	0.29036	4.49195	7.05751e-06	7.26749e-05	up	PTHR24067:SF41 - AKT-INTERACTING PROTEIN (1 of 2)
Lus10013790.g.BGIv1.0	65.9671	1.30273	0.254934	5.11006	3.22053e-07	4.32631e-06	up	PTHR11062//PTHR11062:SF66 - EXOSTOSIN HEPARAN SULFATE GLYCOSYLTRANSFERASE -RELATED // SUBFAMILY NOT NAMED (1 of 2)
Lus10032926.g.BGIv1.0	537.799	1.30177	0.0924865	14.0752	5.39456e-45	8.19998e-43	up	K00430 - peroxidase (E1.11.1.7) (1 of 94)
Lus10015097.g.BGIv1.0	68.7183	1.3	0.251475	5.16952	2.34697e-07	3.2247e-06	up	PF00643 - B-box zinc finger (zf-B_box) (1 of 27)
Lus10025502.g.BGIv1.0	55.8001	1.29851	0.277206	4.68426	2.80974e-06	3.16894e-05	up	?
Lus10038985.g.BGIv1.0	19.8787	1.29752	0.497307	2.60908	0.00907847	0.0379335	up	PF05678 - VQ motif (VQ) (1 of 42)
Lus10038332.g.BGIv1.0	28.7796	1.29732	0.398732	3.25362	0.00113946	0.00669994	up	PTHR31719:SF5 - NAC DOMAIN-CONTAINING PROTEIN 6-RELATED (1 of 2)
Lus10019184.g.BGIv1.0	22.707	1.29673	0.424762	3.05284	0.00226688	0.0120257	up	K15639 - PHYB activation tagged suppressor 1 (CYP734A1, BAS1) (1 of 13)
Lus10006375.g.BGIv1.0	19.9485	1.29253	0.492712	2.62329	0.00870857	0.0367201	up	?
Lus10011416.g.BGIv1.0	21.2177	1.29055	0.479268	2.69275	0.00708655	0.0310364	up	K16285 - RING/U-box domain-containing protein (XERICO) (1 of 1)
Lus10020859.g.BGIv1.0	53.1925	1.28908	0.285698	4.51202	6.42117e-06	6.69186e-05	up	K19040 - E3 ubiquitin-protein ligase ATL10/75/76/77/78 [EC:6.3.2.19] (ATL76S) (1 of 7)
Lus10014226.g.BGIv1.0	37.506	1.28881	0.333871	3.86022	0.000113287	0.000882474	up	KOG0725 - Reductases with broad range of substrate specificities (1 of 96)
Lus10017035.g.BGIv1.0	41.4373	1.2843	0.318517	4.03214	5.52722e-05	0.000467225	up	PTHR33148:SF2 - EMB (1 of 2)
Lus10023423.g.BGIv1.0	28.0367	1.28386	0.39828	3.22351	0.00126632	0.00732965	up	K03283 - heat shock 70kDa protein 1/8 (HSPA1_8) (1 of 21)
Lus10022193.g.BGIv1.0	43.2066	1.28129	0.307754	4.16334	3.13628e-05	0.00028095	up	PTHR10209:SF122 - 1-AMINOCYCLOPROPANE-1-CARBOXYLATE OXIDASE HOMOLOG 10-RELATED (1 of 27)
Lus10024362.g.BGIv1.0	38.1514	1.27925	0.32577	3.92684	8.60684e-05	0.000695993	up	?
Lus10026323.g.BGIv1.0	83.029	1.2756	0.223135	5.7167	1.08611e-08	1.82342e-07	up	PTHR11206//PTHR11206:SF181 - MULTIDRUG RESISTANCE PROTEIN // SUBFAMILY NOT NAMED (1 of 4)
Lus10022264.g.BGIv1.0	30.0706	1.27378	0.363188	3.50721	0.00045283	0.00298802	up	PTHR31301:SF12 - LOB DOMAIN-CONTAINING PROTEIN 25 (1 of 2)
Lus10013045.g.BGIv1.0	18.0872	1.27304	0.479237	2.65638	0.00789839	0.0339314	up	PTHR11220//PTHR11220:SF36 - HEME-BINDING PROTEIN-RELATED // SUBFAMILY NOT NAMED (1 of 2)
Lus10008603.g.BGIv1.0	49.1416	1.27122	0.318595	3.99007	6.60542e-05	0.000547397	up	PTHR31867:SF22 - EXPANSIN-A8 (1 of 6)
Lus10011202.g.BGIv1.0	35.6477	1.26902	0.346925	3.65791	0.000254283	0.00181029	up	PTHR10992//PTHR10992:SF869 - ALPHA/BETA HYDROLASE FOLD-CONTAINING PROTEIN // SUBFAMILY NOT NAMED (1 of 8)
Lus10036705.g.BGIv1.0	104.095	1.26645	0.223327	5.6708	1.42132e-08	2.34535e-07	up	PTHR11654:SF20 - PROTEIN NRT1/ PTR FAMILY 2.12-RELATED (1 of 2)
Lus10024366.g.BGIv1.0	315.497	1.26475	0.125823	10.0518	9.01972e-24	5.66798e-22	up	PTHR22595:SF37 - CHITINASE-RELATED (1 of 9)
Lus10012199.g.BGIv1.0	17.1	1.25995	0.483334	2.6068	0.00913936	0.0381268	up	PTHR10891:SF574 - CALCIUM-BINDING PROTEIN CML30-RELATED (1 of 9)
Lus10033761.g.BGIv1.0	65.0564	1.25966	0.252789	4.98306	6.25871e-07	8.00303e-06	up	PF14009 - Domain of unknown function (DUF4228) (DUF4228) (1 of 47)
Lus10039379.g.BGIv1.0	294.08	1.25689	0.119743	10.4965	8.96019e-26	6.2861e-24	up	PTHR14154:SF5 - EARLY LIGHT-INDUCED PROTEIN 1, CHLOROPLASTIC-RELATED (1 of 4)
Lus10019036.g.BGIv1.0	71.6512	1.25598	0.493493	2.54507	0.0109255	0.0441903	up	PF00069//PF00560//PF08263//PF13855 - Protein kinase domain (Pkinase) // Leucine Rich Repeat (LRR_1) // Leucine rich repeat N-terminal domain (LRRNT_2) // Leucine rich repeat (LRR_8) (1 of 49)
Lus10031841.g.BGIv1.0	146.543	1.25377	0.169712	7.38762	1.49485e-13	4.42876e-12	up	?
Lus10036550.g.BGIv1.0	138.944	1.25308	0.178859	7.00594	2.45332e-12	6.39284e-11	up	2.1.1.274 - Salicylate carboxymethyltransferase / Salicylate O-methyltransferase (1 of 10)
Lus10020696.g.BGIv1.0	2890.57	1.25276	0.042445	29.5149	1.85257e-191	2.40443e-188	up	K05953 - nicotianamine synthase (E2.5.1.43) (1 of 4)
Lus10004349.g.BGIv1.0	28.1125	1.25085	0.391801	3.19257	0.00141012	0.00802977	up	PF14547 - Hydrophobic seed protein (Hydrophob_seed) (1 of 33)
Lus10003010.g.BGIv1.0	45.7033	1.25079	0.29959	4.175	2.97992e-05	0.000267904	up	PTHR11200:SF107 - TYPE I INOSITOL 1,4,5-TRISPHOSPHATE 5-PHOSPHATASE 2 (1 of 3)
Lus10006835.g.BGIv1.0	32.0011	1.25077	0.358314	3.4907	0.000481759	0.00315485	up	PTHR10696//PTHR10696:SF21 - GAMMA-BUTYROBETAINE HYDROXYLASE-RELATED // SUBFAMILY NOT NAMED (1 of 9)
Lus10038520.g.BGIv1.0	32.0552	1.24991	0.383428	3.25983	0.00111479	0.00657322	up	?
Lus10004713.g.BGIv1.0	40.4818	1.24941	0.325468	3.8388	0.000123636	0.000954061	up	PTHR13683:SF347 - CYSTEINE-RICH PEPTIDE FAMILY PROTEIN (1 of 6)
Lus10017685.g.BGIv1.0	180.655	1.24634	0.161308	7.72642	1.10609e-14	3.6665e-13	up	?
Lus10001637.g.BGIv1.0	47.4533	1.24417	0.300795	4.13627	3.53001e-05	0.000312898	up	PTHR31752:SF4 - AUXIN EFFLUX CARRIER COMPONENT 2 (1 of 2)
Lus10026112.g.BGIv1.0	26.47	1.24415	0.408179	3.04804	0.00230341	0.0121927	up	PF00892 - EamA-like transporter family (EamA) (1 of 81)
Lus10009301.g.BGIv1.0	20.4593	1.24191	0.453973	2.73565	0.00622579	0.0278818	up	PTHR31100:SF2 - AT-HOOK MOTIF NUCLEAR LOCALIZED PROTEIN 18-RELATED (1 of 3)
Lus10021333.g.BGIv1.0	93.4725	1.24187	0.206883	6.00275	1.94004e-09	3.62696e-08	up	PTHR11615:SF116 - CASPARIAN STRIP MEMBRANE PROTEIN 1-RELATED (1 of 5)
Lus10006691.g.BGIv1.0	140.518	1.24112	0.194953	6.36626	1.93699e-10	4.16329e-09	up	PTHR11746//PTHR11746:SF99 - O-METHYLTRANSFERASE // SUBFAMILY NOT NAMED (1 of 22)
Lus10040368.g.BGIv1.0	22.5597	1.23847	0.4281	2.89295	0.0038164	0.0186455	up	PTHR11017:SF169 - DISEASE RESISTANCE PROTEIN-RELATED (1 of 61)
Lus10037132.g.BGIv1.0	24.6636	1.23571	0.407699	3.03094	0.0024379	0.0127923	up	PTHR31558:SF1 - F7A19.6 PROTEIN-RELATED (1 of 5)
Lus10038682.g.BGIv1.0	56.8446	1.23268	0.275112	4.48065	7.44174e-06	7.61898e-05	up	PTHR21576//PTHR21576:SF40 - UNCHARACTERIZED NODULIN-LIKE PROTEIN // SUBFAMILY NOT NAMED (1 of 6)
Lus10037734.g.BGIv1.0	76.8101	1.23175	0.255275	4.82519	1.39868e-06	1.67133e-05	up	6.2.1.1//6.2.1.2 - Acetate--CoA ligase / Acyl-activating enzyme // Butyrate--CoA ligase / Fatty acid thiokinase (medium chain) (1 of 5)
Lus10016388.g.BGIv1.0	63.9485	1.23117	0.269267	4.57232	4.82361e-06	5.19559e-05	up	PF01073//PF01370 - 3-beta hydroxysteroid dehydrogenase/isomerase family (3Beta_HSD) // NAD dependent epimerase/dehydratase family (Epimerase) (1 of 1)
Lus10037886.g.BGIv1.0	72.7172	1.2307	0.236568	5.20228	1.9686e-07	2.7394e-06	up	PTHR31656:SF4 - LATE EMBRYOGENESIS ABUNDANT PROTEIN-LIKE PROTEIN (1 of 6)
Lus10025522.g.BGIv1.0	65.9234	1.23033	0.248721	4.94662	7.55141e-07	9.48706e-06	up	PF02458 - Transferase family (Transferase) (1 of 177)
Lus10011041.g.BGIv1.0	25.1292	1.22608	0.425807	2.87942	0.00398403	0.0193135	up	PTHR11200:SF107 - TYPE I INOSITOL 1,4,5-TRISPHOSPHATE 5-PHOSPHATASE 2 (1 of 3)
Lus10020796.g.BGIv1.0	44.1845	1.22598	0.309121	3.96601	7.30846e-05	0.000599183	up	?
Lus10014811.g.BGIv1.0	31.4664	1.22466	0.357645	3.42423	0.000616549	0.00393001	up	PF00954//PF01453//PF07714 - S-locus glycoprotein domain (S_locus_glycop) // D-mannose binding lectin (B_lectin) // Protein tyrosine kinase (Pkinase_Tyr) (1 of 1)
Lus10037808.g.BGIv1.0	21.2144	1.22335	0.445384	2.74672	0.00601948	0.0271393	up	PTHR24067:SF41 - AKT-INTERACTING PROTEIN (1 of 2)
Lus10002909.g.BGIv1.0	24.7064	1.22295	0.431037	2.83723	0.00455075	0.0216197	up	PTHR23079:SF1 - PROTEIN RRF-3 (1 of 3)
Lus10042095.g.BGIv1.0	207.426	1.22216	0.143296	8.52894	1.47697e-17	6.13043e-16	up	PF01357//PF03330 - Pollen allergen (Pollen_allerg_1) // Rare lipoprotein A (RlpA)-like double-psi beta-barrel (DPBB_1) (1 of 57)
Lus10020950.g.BGIv1.0	118.321	1.21929	0.186988	6.52068	6.99883e-11	1.57661e-09	up	PTHR31376:SF1 - PURINE PERMEASE 1-RELATED (1 of 8)
Lus10031310.g.BGIv1.0	188.344	1.21853	0.160536	7.59037	3.18985e-14	1.01262e-12	up	PTHR11200//PTHR11200:SF144 - INOSITOL 5-PHOSPHATASE // SUBFAMILY NOT NAMED (1 of 2)
Lus10018303.g.BGIv1.0	17.7121	1.21845	0.471987	2.58154	0.00983606	0.0404976	up	PF14299 - Phloem protein 2 (PP2) (1 of 38)
Lus10003132.g.BGIv1.0	27.1907	1.2177	0.401447	3.03327	0.00241921	0.0127041	up	?
Lus10027517.g.BGIv1.0	231.643	1.2172	0.152718	7.97022	1.5839e-15	5.68602e-14	up	K04079 - molecular chaperone HtpG (htpG, HSP90A) (1 of 6)
Lus10027167.g.BGIv1.0	22.7817	1.21645	0.448345	2.71321	0.0066635	0.0295208	up	?
Lus10019018.g.BGIv1.0	21.5477	1.2154	0.477891	2.54325	0.0109826	0.0443843	up	PF13639//PF13947//PF14380 - Ring finger domain (zf-RING_2) // Wall-associated receptor kinase galacturonan-binding (GUB_WAK_bind) // Wall-associated receptor kinase C-terminal (WAK_assoc) (1 of 2)
Lus10014919.g.BGIv1.0	155.059	1.21536	0.161668	7.51763	5.57769e-14	1.72995e-12	up	PTHR31717:SF2 - CCT MOTIF FAMILY PROTEIN (1 of 4)
Lus10040573.g.BGIv1.0	21.0998	1.21173	0.436093	2.77861	0.00545919	0.0250333	up	PF00069//PF00582 - Protein kinase domain (Pkinase) // Universal stress protein family (Usp) (1 of 11)
Lus10024035.g.BGIv1.0	57.1546	1.20835	0.262085	4.61052	4.01662e-06	4.39497e-05	up	K12356 - coniferyl-alcohol glucosyltransferase (UGT72E) (1 of 4)
Lus10003560.g.BGIv1.0	67.887	1.20833	0.251156	4.81109	1.50111e-06	1.78237e-05	up	K08176 - MFS transporter, PHS family, inorganic phosphate transporter (PHO84) (1 of 10)
Lus10033988.g.BGIv1.0	69.7814	1.20778	0.244533	4.93913	7.8472e-07	9.82575e-06	up	PTHR33649:SF2 - PAR1 PROTEIN (1 of 2)
Lus10035846.g.BGIv1.0	44.1109	1.20632	0.31489	3.83091	0.000127669	0.000981589	up	PF00504 - Chlorophyll A-B binding protein (Chloroa_b-bind) (1 of 53)
Lus10035043.g.BGIv1.0	23.9155	1.20611	0.445877	2.70503	0.00682979	0.030123	up	PTHR31003:SF4 - GENOMIC DNA, CHROMOSOME 3, TAC CLONE:K13N2-RELATED (1 of 4)
Lus10001260.g.BGIv1.0	26.3196	1.20342	0.387259	3.10753	0.00188656	0.010288	up	PF11204 - Protein of unknown function (DUF2985) (DUF2985) (1 of 4)
Lus10010153.g.BGIv1.0	145.716	1.2024	0.175937	6.83428	8.2419e-12	2.04202e-10	up	PTHR19139:SF102 - AQUAPORIN NIP5-1-RELATED (1 of 3)
Lus10011346.g.BGIv1.0	46.7489	1.20031	0.311775	3.8499	0.000118164	0.000916393	up	PTHR31221:SF25 - WRKY TRANSCRIPTION FACTOR 45-RELATED (1 of 4)
Lus10038588.g.BGIv1.0	151.913	1.1998	0.164502	7.2935	3.02007e-13	8.6513e-12	up	PTHR31656:SF4 - LATE EMBRYOGENESIS ABUNDANT PROTEIN-LIKE PROTEIN (1 of 6)
Lus10039698.g.BGIv1.0	37.5156	1.19946	0.34179	3.50936	0.000449188	0.00296631	up	PF01657 - Salt stress response/antifungal (Stress-antifung) (1 of 114)
Lus10005629.g.BGIv1.0	93.0265	1.19708	0.217119	5.51349	3.51786e-08	5.47809e-07	up	4.1.1.17 - Ornithine decarboxylase / L-ornithine carboxy-lyase (1 of 2)
Lus10002893.g.BGIv1.0	31.9574	1.19706	0.387806	3.08674	0.00202361	0.0109276	up	2.3.1.84 - Alcohol O-acetyltransferase / AATASE (1 of 62)
Lus10037357.g.BGIv1.0	172.135	1.19695	0.160065	7.47788	7.55286e-14	2.31701e-12	up	PTHR19375//PTHR19375:SF147 - HEAT SHOCK PROTEIN 70KDA // SUBFAMILY NOT NAMED (1 of 6)
Lus10005663.g.BGIv1.0	83.4004	1.19693	0.223544	5.35436	8.586e-08	1.25917e-06	up	PTHR31642:SF9 - (Z)-3-HEXEN-1-OL ACETYLTRANSFERASE (1 of 13)
Lus10033882.g.BGIv1.0	27.4978	1.19543	0.415245	2.87886	0.0039911	0.0193422	up	PTHR11819 - SODIUM/SOLUTE SYMPORTER (1 of 4)
Lus10006317.g.BGIv1.0	138.389	1.19425	0.175983	6.78615	1.15165e-11	2.8202e-10	up	PTHR21495:SF41 - DIRIGENT PROTEIN 10-RELATED (1 of 2)
Lus10030068.g.BGIv1.0	55.2092	1.19355	0.298472	3.99886	6.36486e-05	0.000529672	up	PF00560//PF08263//PF12799 - Leucine Rich Repeat (LRR_1) // Leucine rich repeat N-terminal domain (LRRNT_2) // Leucine Rich repeats (2 copies) (LRR_4) (1 of 1)
Lus10001881.g.BGIv1.0	100.9	1.19344	0.200634	5.94834	2.70873e-09	4.95694e-08	up	PTHR23315:SF131 - ARMADILLO/BETA-CATENIN-LIKE REPEAT-CONTAINING PROTEIN (1 of 2)
Lus10040683.g.BGIv1.0	309.686	1.19095	0.12193	9.76754	1.55176e-22	9.12267e-21	up	?
Lus10041729.g.BGIv1.0	33.9898	1.18799	0.367594	3.23179	0.00123018	0.00715484	up	PTHR23023//PTHR23023:SF146 - DIMETHYLANILINE MONOOXYGENASE // SUBFAMILY NOT NAMED (1 of 2)
Lus10041518.g.BGIv1.0	52.1662	1.18686	0.293574	4.04281	5.28152e-05	0.000448816	up	PTHR24322:SF547 - ALCOHOL DEHYDROGENASE-LIKE PROTEIN (1 of 2)
Lus10027878.g.BGIv1.0	290.075	1.18626	0.122044	9.71993	2.47945e-22	1.44009e-20	up	PTHR27000:SF43 - GENOMIC DNA, CHROMOSOME 3, P1 CLONE: MLD14 (1 of 4)
Lus10026981.g.BGIv1.0	24.9474	1.1847	0.399833	2.96297	0.00304682	0.0154679	up	?
Lus10030103.g.BGIv1.0	32.4095	1.18377	0.351214	3.3705	0.000750315	0.00465687	up	PTHR26312:SF75 - F18B13.21 PROTEIN-RELATED (1 of 4)
Lus10019924.g.BGIv1.0	102.919	1.18322	0.198082	5.97342	2.3233e-09	4.29587e-08	up	?
Lus10025929.g.BGIv1.0	23.4542	1.17935	0.421591	2.79737	0.00515208	0.0239439	up	PF03909 - BSD domain (BSD) (1 of 12)
Lus10037663.g.BGIv1.0	38.1138	1.1793	0.371447	3.17488	0.00149898	0.00844763	up	PTHR31238:SF21 - GERMIN-LIKE PROTEIN SUBFAMILY 3 MEMBER 3 (1 of 13)
Lus10007331.g.BGIv1.0	35.9535	1.17881	0.352782	3.34147	0.000833359	0.00510561	up	PTHR31479:SF3 - GB (1 of 4)
Lus10032019.g.BGIv1.0	52.2347	1.17878	0.277338	4.25034	2.13447e-05	0.00019826	up	2.3.1.188 - Omega-hydroxypalmitate O-feruloyl transferase / O-hydroxycinnamoyltransferase (1 of 21)
Lus10034505.g.BGIv1.0	23.354	1.17644	0.412807	2.84985	0.00437399	0.0209036	up	PTHR24298:SF86 - CYTOCHROME P450 71B21-RELATED (1 of 14)
Lus10016128.g.BGIv1.0	48.8693	1.17544	0.289717	4.0572	4.96641e-05	0.000425036	up	PTHR11926//PTHR11926:SF383 - GLUCOSYL/GLUCURONOSYL TRANSFERASES // SUBFAMILY NOT NAMED (1 of 5)
Lus10012148.g.BGIv1.0	39.0328	1.1752	0.31996	3.67295	0.000239764	0.0017178	up	PTHR11926//PTHR11926:SF366 - GLUCOSYL/GLUCURONOSYL TRANSFERASES // SUBFAMILY NOT NAMED (1 of 2)
Lus10011278.g.BGIv1.0	35.6956	1.17459	0.352666	3.3306	0.000866593	0.0052776	up	PTHR23155//PTHR23155:SF563 - LEUCINE-RICH REPEAT-CONTAINING PROTEIN // SUBFAMILY NOT NAMED (1 of 11)
Lus10039830.g.BGIv1.0	22.6507	1.1743	0.418572	2.80548	0.0050241	0.023458	up	PF00407 - Pathogenesis-related protein Bet v I family (Bet_v_1) (1 of 55)
Lus10023689.g.BGIv1.0	103.907	1.17346	0.213059	5.50766	3.63643e-08	5.65491e-07	up	PTHR21495:SF39 - DIRIGENT PROTEIN 16-RELATED (1 of 2)
Lus10007633.g.BGIv1.0	24.6237	1.17344	0.406862	2.88414	0.0039249	0.0190679	up	PF01657//PF07714 - Salt stress response/antifungal (Stress-antifung) // Protein tyrosine kinase (Pkinase_Tyr) (1 of 23)
Lus10026863.g.BGIv1.0	42.1949	1.17285	0.309439	3.79026	0.00015049	0.00113736	up	PTHR22298:SF39 - ENDOGLUCANASE 7 (1 of 1)
Lus10000333.g.BGIv1.0	71.0953	1.17117	0.254885	4.5949	4.32963e-06	4.70391e-05	up	K10664 - E3 ubiquitin-protein ligase ATL6/9/15/31/42/55 [EC:6.3.2.19] (ATL6S) (1 of 8)
Lus10029585.g.BGIv1.0	74.8358	1.17103	0.252462	4.63845	3.5104e-06	3.88899e-05	up	PTHR21495:SF41 - DIRIGENT PROTEIN 10-RELATED (1 of 2)
Lus10041684.g.BGIv1.0	650.491	1.16952	0.0794801	14.7146	5.1937e-49	9.1282e-47	up	PTHR19241:SF219 - ABC TRANSPORTER G FAMILY MEMBER 38 (1 of 17)
Lus10015734.g.BGIv1.0	24.491	1.16762	0.454952	2.56647	0.010274	0.0419373	up	PTHR12565:SF173 - TRANSCRIPTION FACTOR UNE10 (1 of 5)
Lus10032906.g.BGIv1.0	21.9069	1.16567	0.435211	2.67841	0.00739736	0.0321473	up	PF03168 - Late embryogenesis abundant protein (LEA_2) (1 of 87)
Lus10010479.g.BGIv1.0	450.519	1.16541	0.107286	10.8626	1.73642e-27	1.35638e-25	up	PTHR31731:SF16 - BIFUNCTIONAL INHIBITOR/LIPID-TRANSFER PROTEIN/SEED STORAGE 2S ALBUMIN-LIKE PROTEIN (1 of 2)
Lus10013304.g.BGIv1.0	35.4503	1.16379	0.35588	3.27017	0.00107483	0.00637325	up	K03549 - KUP system potassium uptake protein (kup) (1 of 14)
Lus10040765.g.BGIv1.0	47.3926	1.16364	0.291043	3.99817	6.38329e-05	0.000530813	up	PTHR11260:SF303 - GLUTATHIONE S-TRANSFERASE U1-RELATED (1 of 16)
Lus10041784.g.BGIv1.0	204.245	1.16222	0.144293	8.05458	7.97511e-16	2.90941e-14	up	PTHR31388:SF3 - PEROXIDASE 36-RELATED (1 of 2)
Lus10010634.g.BGIv1.0	101.738	1.16199	0.20982	5.53804	3.05874e-08	4.79412e-07	up	PTHR31388:SF4 - PEROXIDASE 9 (1 of 2)
Lus10038552.g.BGIv1.0	66.9941	1.16128	0.257316	4.51306	6.38977e-06	6.66325e-05	up	PF00954//PF01453//PF07714//PF08276//PF11883 - S-locus glycoprotein domain (S_locus_glycop) // D-mannose binding lectin (B_lectin) // Protein tyrosine kinase (Pkinase_Tyr) // PAN-like domain (PAN_2) // Domain of unknown function (DUF3403) (DUF3403) (1 of 8)
Lus10022548.g.BGIv1.0	175.514	1.16109	0.159257	7.29067	3.08413e-13	8.81983e-12	up	PTHR24064:SF274 - INORGANIC PHOSPHATE TRANSPORTER 1-4 (1 of 7)
Lus10019027.g.BGIv1.0	330.092	1.16066	0.121631	9.54251	1.3941e-21	7.85376e-20	up	PTHR31717:SF2 - CCT MOTIF FAMILY PROTEIN (1 of 4)
Lus10008479.g.BGIv1.0	29.8811	1.15918	0.377641	3.06954	0.0021439	0.0114762	up	K13248 - pyridoxal phosphate phosphatase PHOSPHO2 (PHOSPHO2) (1 of 5)
Lus10015222.g.BGIv1.0	20.3696	1.15786	0.449094	2.57821	0.00993129	0.040805	up	K15397 - 3-ketoacyl-CoA synthase (KCS) (1 of 25)
Lus10025833.g.BGIv1.0	37.4067	1.15575	0.325788	3.54756	0.000388818	0.00261837	up	PTHR11615//PTHR11615:SF118 - NITRATE, FROMATE, IRON DEHYDROGENASE // SUBFAMILY NOT NAMED (1 of 2)
Lus10004958.g.BGIv1.0	69.4434	1.15566	0.251807	4.58949	4.44337e-06	4.81972e-05	up	PTHR27001:SF224 - SOMATIC EMBRYOGENESIS RECEPTOR KINASE 1 (1 of 4)
Lus10028643.g.BGIv1.0	61.1793	1.15465	0.254675	4.53382	5.79251e-06	6.10075e-05	up	PTHR33133:SF5 - EXPRESSED PROTEIN (1 of 2)
Lus10036854.g.BGIv1.0	263.027	1.15375	0.124631	9.2573	2.09662e-20	1.10203e-18	up	PTHR11206:SF79 - MATE EFFLUX FAMILY PROTEIN (1 of 6)
Lus10029543.g.BGIv1.0	366.483	1.15323	0.112452	10.2554	1.11926e-24	7.53879e-23	up	PTHR31235:SF22 - PEROXIDASE 47 (1 of 1)
Lus10022547.g.BGIv1.0	34.8548	1.15161	0.340033	3.38676	0.000707225	0.00442278	up	PTHR24064:SF274 - INORGANIC PHOSPHATE TRANSPORTER 1-4 (1 of 7)
Lus10000608.g.BGIv1.0	80.5874	1.14988	0.230453	4.98964	6.04927e-07	7.75337e-06	up	PTHR11062:SF108 - EXOSTOSIN FAMILY PROTEIN (1 of 2)
Lus10002716.g.BGIv1.0	160.306	1.14765	0.361212	3.17722	0.00148696	0.00840073	up	?
Lus10011329.g.BGIv1.0	103.315	1.14746	0.209134	5.48671	4.0948e-08	6.3182e-07	up	2.7.7.59 - [Protein-PII] uridylyltransferase / Uridylyl removing enzyme (1 of 18)
Lus10013383.g.BGIv1.0	39.2342	1.14471	0.328534	3.4843	0.000493433	0.00322129	up	PTHR27005:SF32 - F16F4.7 PROTEIN-RELATED (1 of 5)
Lus10024078.g.BGIv1.0	63.9195	1.14316	0.251399	4.54719	5.43681e-06	5.77116e-05	up	1.14.13.89 - Isoflavone 2'-hydroxylase / Isoflavone 2'-monooxygenase (1 of 14)
Lus10004984.g.BGIv1.0	37.0724	1.14272	0.336431	3.39658	0.000682332	0.00429016	up	1.1.1.206//1.1.1.236 - Tropinone reductase I / Tropinone reductase // Tropinone reductase II / Tropinone reductase (1 of 20)
Lus10031453.g.BGIv1.0	45.9458	1.14263	0.293607	3.89169	9.95484e-05	0.000789857	up	3.5.1.9 - Arylformamidase / Kynurenine formamidase (1 of 9)
Lus10010388.g.BGIv1.0	78.0671	1.1425	0.249487	4.57939	4.66343e-06	5.04544e-05	up	?
Lus10043357.g.BGIv1.0	264.726	1.13918	0.1344	8.47606	2.32957e-17	9.47126e-16	up	K04123 - ent-kaurenoic acid hydroxylase (KAO) (1 of 3)
Lus10023375.g.BGIv1.0	108.884	1.13903	0.19196	5.93367	2.96229e-09	5.39755e-08	up	1.3.3.8 - Tetrahydroberberine oxidase / THB oxidase (1 of 42)
Lus10027455.g.BGIv1.0	25.6665	1.13837	0.402691	2.8269	0.00470007	0.0221979	up	PF01535//PF12854//PF13041 - PPR repeat (PPR) // PPR repeat (PPR_1) // PPR repeat family (PPR_2) (1 of 35)
Lus10028015.g.BGIv1.0	47.8892	1.13781	0.30175	3.7707	0.000162792	0.00121995	up	K10760 - adenylate isopentenyltransferase (cytokinin synthase) (IPT) (1 of 5)
Lus10008097.g.BGIv1.0	86.3453	1.13657	0.233408	4.86944	1.11915e-06	1.36142e-05	up	PTHR10209//PTHR10209:SF119 - OXIDOREDUCTASE, 2OG-FE II OXYGENASE FAMILY PROTEIN // SUBFAMILY NOT NAMED (1 of 2)
Lus10007530.g.BGIv1.0	213.057	1.13643	0.148656	7.64471	2.09416e-14	6.74952e-13	up	PTHR31213:SF3 - ABSCISIC ACID RECEPTOR PYL4 (1 of 5)
Lus10021259.g.BGIv1.0	109.755	1.13545	0.212346	5.34716	8.93441e-08	1.30742e-06	up	PTHR12632:SF7 - NUCLEAR TRANSCRIPTION FACTOR Y SUBUNIT A-10-RELATED (1 of 2)
Lus10034897.g.BGIv1.0	78.9253	1.13481	0.244006	4.65076	3.30709e-06	3.68431e-05	up	2.7.11.1 - Non-specific serine/threonine protein kinase / Threonine-specific protein kinase (1 of 1714)
Lus10024626.g.BGIv1.0	2576.13	1.13449	0.0448517	25.2942	3.70112e-141	2.90452e-138	up	PF14547 - Hydrophobic seed protein (Hydrophob_seed) (1 of 33)
Lus10032194.g.BGIv1.0	37.5579	1.13395	0.326685	3.47107	0.000518391	0.00336795	up	PTHR32166:SF15 - F16P17.2 PROTEIN (1 of 1)
Lus10030318.g.BGIv1.0	108.949	1.13349	0.200789	5.64517	1.65022e-08	2.68888e-07	up	PTHR21495:SF51 - DIRIGENT PROTEIN 24-RELATED (1 of 2)
Lus10018631.g.BGIv1.0	30.343	1.13335	0.39501	2.86916	0.0041157	0.0198661	up	PTHR10168:SF111 - MONOTHIOL GLUTAREDOXIN-S13 (1 of 3)
Lus10007620.g.BGIv1.0	53.9832	1.13332	0.271338	4.17677	2.95683e-05	0.000266076	up	PF01535//PF13041 - PPR repeat (PPR) // PPR repeat family (PPR_2) (1 of 308)
Lus10031151.g.BGIv1.0	181.513	1.13131	0.151583	7.46332	8.43676e-14	2.58113e-12	up	K11813 - tryptophan N-monooxygenase (CYP79B3) (1 of 1)
Lus10031356.g.BGIv1.0	34.2914	1.13109	0.3515	3.2179	0.00129132	0.00745899	up	PTHR12925:SF0 - PROTEIN HIKESHI (1 of 2)
Lus10036005.g.BGIv1.0	68.6318	1.13094	0.244268	4.62991	3.65826e-06	4.0382e-05	up	PF14009 - Domain of unknown function (DUF4228) (DUF4228) (1 of 47)
Lus10037229.g.BGIv1.0	28.7653	1.12737	0.375857	2.99946	0.00270461	0.0139701	up	PF01535//PF13041//PF13812//PF14432 - PPR repeat (PPR) // PPR repeat family (PPR_2) // Pentatricopeptide repeat domain (PPR_3) // DYW family of nucleic acid deaminases (DYW_deaminase) (1 of 21)
Lus10041644.g.BGIv1.0	42.3531	1.12525	0.325457	3.45746	0.000545292	0.00352305	up	2.4.1.69 - Galactoside 2-alpha-L-fucosyltransferase / Secretor-type beta-galactoside alpha-1->2 fucosyltransferase (1 of 17)
Lus10033515.g.BGIv1.0	40.4667	1.12421	0.314312	3.57672	0.000347932	0.00238057	up	K19040 - E3 ubiquitin-protein ligase ATL10/75/76/77/78 [EC:6.3.2.19] (ATL76S) (1 of 7)
Lus10041811.g.BGIv1.0	56.0171	1.1239	0.274446	4.09514	4.21908e-05	0.000367413	up	KOG0156 - Cytochrome P450 CYP2 subfamily (1 of 184)
Lus10031153.g.BGIv1.0	72.6786	1.12051	0.240863	4.65208	3.286e-06	3.66444e-05	up	K13783 - MFS transporter, OPA family, solute carrier family 37 (glycerol-3-phosphate transporter), member 1/2 (SLC37A1_2) (1 of 5)
Lus10005397.g.BGIv1.0	86.0633	1.12019	0.222369	5.03756	4.71511e-07	6.14805e-06	up	PF07468 - Agglutinin domain (Agglutinin) (1 of 19)
Lus10014671.g.BGIv1.0	45.4233	1.11761	0.299117	3.73636	0.000186705	0.00137473	up	PTHR11017//PTHR11017:SF162 - LEUCINE-RICH REPEAT-CONTAINING PROTEIN // SUBFAMILY NOT NAMED (1 of 62)
Lus10014377.g.BGIv1.0	24.2592	1.11478	0.43448	2.56578	0.0102944	0.0420104	up	?
Lus10030212.g.BGIv1.0	21.3004	1.11433	0.446034	2.4983	0.0124789	0.0491532	up	PTHR11514:SF40 - TRANSCRIPTION FACTOR BHLH14 (1 of 2)
Lus10031622.g.BGIv1.0	26.824	1.11414	0.423125	2.63312	0.00846056	0.0359212	up	2.3.1.74 - Naringenin-chalcone synthase / Flavonone synthase (1 of 9)
Lus10007466.g.BGIv1.0	73.2492	1.11359	0.244169	4.56071	5.09801e-06	5.46308e-05	up	PTHR13683//PTHR13683:SF276 - ASPARTYL PROTEASES // SUBFAMILY NOT NAMED (1 of 4)
Lus10013384.g.BGIv1.0	72.8188	1.11116	0.233851	4.75156	2.01858e-06	2.34079e-05	up	PF00008 - EGF-like domain (EGF) (1 of 1)
Lus10042181.g.BGIv1.0	29.9653	1.1098	0.40317	2.75268	0.00591098	0.0267276	up	KOG0725 - Reductases with broad range of substrate specificities (1 of 96)
Lus10017850.g.BGIv1.0	24.9034	1.10834	0.405093	2.73601	0.00621886	0.0278582	up	PTHR11972//PTHR11972:SF76 - NADPH OXIDASE // SUBFAMILY NOT NAMED (1 of 1)
Lus10039861.g.BGIv1.0	38.2198	1.10753	0.327608	3.38065	0.000723152	0.00450901	up	K00815 - tyrosine aminotransferase (TAT) (1 of 9)
Lus10002124.g.BGIv1.0	37.5217	1.10696	0.330521	3.34913	0.000810651	0.00497915	up	K01184 - polygalacturonase (E3.2.1.15) (1 of 6)
Lus10028264.g.BGIv1.0	37.6995	1.10563	0.35634	3.10273	0.00191742	0.0104377	up	PTHR24078:SF261 - DNAJ (HSP40) HOMOLOG, SUBFAMILY A, MEMBER 3A (1 of 6)
Lus10023271.g.BGIv1.0	46.9671	1.1051	0.290888	3.79907	0.000145242	0.00110288	up	PTHR11785:SF230 - CATIONIC AMINO ACID TRANSPORTER 1 (1 of 3)
Lus10022443.g.BGIv1.0	61.8409	1.10421	0.287516	3.84053	0.000122768	0.000947579	up	K13379 - reversibly glycosylated polypeptide / UDP-arabinopyranose mutase (RGP, UTM) (1 of 9)
Lus10037160.g.BGIv1.0	48.6061	1.10393	0.287307	3.84232	0.000121875	0.000941764	up	PTHR11615:SF81 - CASPARIAN STRIP MEMBRANE PROTEIN 5 (1 of 4)
Lus10026176.g.BGIv1.0	260.007	1.10364	0.129717	8.50806	1.76873e-17	7.26105e-16	up	PTHR21495:SF59 - DIRIGENT PROTEIN 20-RELATED (1 of 5)
Lus10005399.g.BGIv1.0	141.237	1.1033	0.167683	6.57969	4.71434e-11	1.08074e-09	up	K04121 - ent-kaurene synthase (E4.2.3.19) (1 of 3)
Lus10005662.g.BGIv1.0	30.5158	1.10215	0.371277	2.96855	0.00299209	0.0152405	up	PTHR31642:SF9 - (Z)-3-HEXEN-1-OL ACETYLTRANSFERASE (1 of 13)
Lus10036343.g.BGIv1.0	189.296	1.10144	0.154268	7.13981	9.34613e-13	2.54343e-11	up	PTHR13683:SF268 - EUKARYOTIC ASPARTYL PROTEASE FAMILY PROTEIN (1 of 11)
Lus10041317.g.BGIv1.0	46.0854	1.10072	0.296754	3.7092	0.000207913	0.00151371	up	PTHR33604:SF2 - GLYCOSYLTRANSFERASE FAMILY PROTEIN 2 (1 of 2)
Lus10025561.g.BGIv1.0	50.7404	1.09831	0.290765	3.77731	0.000158531	0.00119195	up	?
Lus10015515.g.BGIv1.0	26.9654	1.09816	0.392583	2.79726	0.00515385	0.0239489	up	K12338 - anthocyanidin 3-O-glucoside 5-O-glucosyltransferase (UGT75C1) (1 of 3)
Lus10042535.g.BGIv1.0	39.7503	1.09815	0.330444	3.32326	0.000889716	0.00539991	up	PTHR19317:SF3 - PRA1 FAMILY PROTEIN E (1 of 2)
Lus10024583.g.BGIv1.0	156.339	1.09799	0.163092	6.73233	1.66969e-11	4.03607e-10	up	2.4.1.324 - 7-deoxyloganetin glucosyltransferase / UGT85A24 (1 of 35)
Lus10039324.g.BGIv1.0	23.9862	1.09735	0.403498	2.71959	0.00653625	0.0290295	up	PTHR31194//PTHR31194:SF16 - SHN SHINE , DNA BINDING / TRANSCRIPTION FACTOR // SUBFAMILY NOT NAMED (1 of 5)
Lus10017228.g.BGIv1.0	308.503	1.09679	0.116042	9.4517	3.33356e-21	1.8411e-19	up	PTHR21495:SF59 - DIRIGENT PROTEIN 20-RELATED (1 of 5)
Lus10005991.g.BGIv1.0	85.3725	1.09618	0.218239	5.02284	5.09124e-07	6.6053e-06	up	PTHR23070:SF13 - P-LOOP CONTAINING NUCLEOSIDE TRIPHOSPHATE HYDROLASES SUPERFAMILY PROTEIN (1 of 6)
Lus10017539.g.BGIv1.0	24.2497	1.09591	0.418667	2.61762	0.00885462	0.037215	up	PTHR21495:SF40 - DIRIGENT PROTEIN 12-RELATED (1 of 2)
Lus10004177.g.BGIv1.0	23.23	1.09538	0.43262	2.53196	0.0113427	0.0454312	up	1.14.19.6//1.3.1.35 - Delta(12)-fatty-acid desaturase / Oleoyl-CoA Delta(12) desaturase (1 of 11)
Lus10012879.g.BGIv1.0	157.896	1.09306	0.166614	6.56047	5.36394e-11	1.22136e-09	up	1.14.13.121 - Premnaspirodiene oxygenase / Hyoscymus muticus premnaspirodiene oxygenase (1 of 43)
Lus10026740.g.BGIv1.0	1964.45	1.08964	0.0637645	17.0885	1.80887e-65	4.80631e-63	up	PF01190//PF04554 - Pollen proteins Ole e I like (Pollen_Ole_e_I) // Extensin-like region (Extensin_2) (1 of 2)
Lus10017595.g.BGIv1.0	92.8483	1.08878	0.227552	4.78474	1.71206e-06	2.00894e-05	up	K10717 - cytokinin trans-hydroxylase (CYP735A) (1 of 2)
Lus10030886.g.BGIv1.0	68.5885	1.08822	0.246644	4.4121	1.02373e-05	0.000101754	up	PTHR31375:SF34 - PECTIN LYASE-LIKE SUPERFAMILY PROTEIN (1 of 4)
Lus10027720.g.BGIv1.0	32.1152	1.08776	0.354833	3.06555	0.00217274	0.0115962	up	PF03140 - Plant protein of unknown function (DUF247) (1 of 37)
Lus10009610.g.BGIv1.0	50.2247	1.08754	0.303936	3.57817	0.000346002	0.00236925	up	PTHR11932//PTHR11932:SF86 - CULLIN // SUBFAMILY NOT NAMED (1 of 5)
Lus10028337.g.BGIv1.0	1499.2	1.08632	0.0596938	18.1982	5.32915e-74	1.59143e-71	up	PTHR31388:SF3 - PEROXIDASE 36-RELATED (1 of 2)
Lus10039746.g.BGIv1.0	33.7507	1.08553	0.352143	3.08263	0.00205179	0.0110586	up	PTHR31625:SF2 - COUMAROYL-COA:ANTHOCYANIDIN 3-O-GLUCOSIDE-6''-O-COUMAROYLTRANSFERASE 1-RELATED (1 of 11)
Lus10005605.g.BGIv1.0	45.1385	1.08497	0.314335	3.45164	0.000557198	0.00359172	up	3.4.24.34 - Neutrophil collagenase / Matrix metalloproteinase 8 (1 of 4)
Lus10034668.g.BGIv1.0	168.816	1.08374	0.166652	6.503	7.87337e-11	1.76654e-09	up	K13051 - beta-aspartyl-peptidase (threonine type) [EC:3.4.19.5] (iaaA, ASRGL1) (1 of 3)
Lus10020287.g.BGIv1.0	77.8992	1.08373	0.253545	4.27432	1.91719e-05	0.00017961	up	PTHR34132:SF1 - EMB (1 of 4)
Lus10019635.g.BGIv1.0	28.6423	1.08098	0.379336	2.84965	0.00437672	0.0209137	up	PTHR24361:SF300 - MITOGEN-ACTIVATED PROTEIN KINASE KINASE KINASE 5 (1 of 6)
Lus10027143.g.BGIv1.0	146.719	1.08074	0.16985	6.36288	1.98004e-10	4.25041e-09	up	PF02298 - Plastocyanin-like domain (Cu_bind_like) (1 of 88)
Lus10030604.g.BGIv1.0	431.978	1.08037	0.101125	10.6835	1.21628e-26	8.86463e-25	up	PTHR31375:SF34 - PECTIN LYASE-LIKE SUPERFAMILY PROTEIN (1 of 4)
Lus10013675.g.BGIv1.0	57.3812	1.0803	0.302376	3.57272	0.000353291	0.00241039	up	PTHR27000:SF9 - LEUCINE-RICH REPEAT RECEPTOR-LIKE SERINE/THREONINE/TYROSINE-PROTEIN KINASE SOBIR1 (1 of 4)
Lus10002073.g.BGIv1.0	144.124	1.0802	0.185383	5.82689	5.64685e-09	9.86809e-08	up	PF04520 - Senescence regulator (Senescence_reg) (1 of 20)
Lus10001766.g.BGIv1.0	122.902	1.07981	0.180156	5.99373	2.0508e-09	3.82132e-08	up	PTHR22750 - G-PROTEIN COUPLED RECEPTOR (1 of 2)
Lus10041685.g.BGIv1.0	1074.1	1.07898	0.069955	15.4239	1.12979e-53	2.25591e-51	up	PTHR19241:SF219 - ABC TRANSPORTER G FAMILY MEMBER 38 (1 of 17)
Lus10033938.g.BGIv1.0	43.6898	1.07768	0.306952	3.51092	0.000446558	0.00295183	up	PTHR31194//PTHR31194:SF16 - SHN SHINE , DNA BINDING / TRANSCRIPTION FACTOR // SUBFAMILY NOT NAMED (1 of 5)
Lus10041891.g.BGIv1.0	555.71	1.07732	0.0874044	12.3257	6.58489e-35	7.14492e-33	up	PTHR24423:SF436 - HISTIDINE KINASE 1 (1 of 2)
Lus10035692.g.BGIv1.0	264.801	1.07527	0.134309	8.00592	1.18579e-15	4.29799e-14	up	PTHR19241:SF213 - ABC TRANSPORTER G FAMILY MEMBER 14 (1 of 5)
Lus10000332.g.BGIv1.0	154.008	1.06907	0.166922	6.40463	1.50731e-10	3.28155e-09	up	PTHR11969:SF26 - TRANSCRIPTION FACTOR BHLH99 (1 of 2)
Lus10014429.g.BGIv1.0	181.815	1.06789	0.169387	6.30443	2.89247e-10	6.05499e-09	up	PTHR32002:SF3 - PROTEIN NLP1-RELATED (1 of 5)
Lus10004331.g.BGIv1.0	38.795	1.06583	0.352416	3.02435	0.00249167	0.0130359	up	KOG0156 - Cytochrome P450 CYP2 subfamily (1 of 184)
Lus10009351.g.BGIv1.0	690.645	1.06583	0.0851338	12.5195	5.84339e-36	6.52931e-34	up	PTHR10015:SF166 - HEAT STRESS TRANSCRIPTION FACTOR B-1 (1 of 2)
Lus10031154.g.BGIv1.0	62.1269	1.06571	0.265401	4.01548	5.93252e-05	0.000498116	up	PTHR11527:SF95 - 23.5 KDA HEAT SHOCK PROTEIN, MITOCHONDRIAL-RELATED (1 of 2)
Lus10015172.g.BGIv1.0	40.5867	1.0652	0.317609	3.35381	0.000797069	0.00490465	up	PF05498 - Rapid ALkalinization Factor (RALF) (RALF) (1 of 21)
Lus10013873.g.BGIv1.0	26.7867	1.06462	0.397931	2.6754	0.00746411	0.0323748	up	PF00646 - F-box domain (F-box) (1 of 240)
Lus10039699.g.BGIv1.0	63.2027	1.0638	0.262984	4.04509	5.23021e-05	0.000445129	up	PF01657 - Salt stress response/antifungal (Stress-antifung) (1 of 114)
Lus10021332.g.BGIv1.0	28.9763	1.06313	0.401942	2.64498	0.00816958	0.0348701	up	PTHR11615:SF116 - CASPARIAN STRIP MEMBRANE PROTEIN 1-RELATED (1 of 5)
Lus10033555.g.BGIv1.0	65.9699	1.06179	0.252422	4.20639	2.5948e-05	0.000236653	up	K10717 - cytokinin trans-hydroxylase (CYP735A) (1 of 2)
Lus10024029.g.BGIv1.0	132.238	1.06117	0.175962	6.03069	1.63266e-09	3.1004e-08	up	PTHR31636:SF53 - SCARECROW-LIKE PROTEIN 15 (1 of 2)
Lus10003805.g.BGIv1.0	24.9294	1.05783	0.401854	2.63237	0.00847905	0.0359906	up	PTHR11926:SF242 - UDP-GLYCOSYLTRANSFERASE 71B2-RELATED (1 of 10)
Lus10008184.g.BGIv1.0	29.9605	1.0566	0.379371	2.78514	0.00535042	0.0246451	up	PTHR23500:SF112 - SUGAR TRANSPORTER ERD6-LIKE 7 (1 of 10)
Lus10032233.g.BGIv1.0	84.7406	1.05402	0.228151	4.61984	3.84034e-06	4.224e-05	up	PTHR31080:SF19 - PLANT INVERTASE/PECTIN METHYLESTERASE INHIBITOR SUPERFAMILY PROTEIN (1 of 5)
Lus10024328.g.BGIv1.0	29.9498	1.05222	0.368492	2.85548	0.00429717	0.0206036	up	K06966 - uncharacterized protein (K06966) (1 of 15)
Lus10020768.g.BGIv1.0	130.629	1.05107	0.183084	5.74091	9.41717e-09	1.5969e-07	up	PTHR10210:SF34 - RIBOSE-PHOSPHATE PYROPHOSPHOKINASE 4 (1 of 4)
Lus10009299.g.BGIv1.0	63.3962	1.05096	0.285397	3.68246	0.000230996	0.00166097	up	PF01535//PF13041//PF13812 - PPR repeat (PPR) // PPR repeat family (PPR_2) // Pentatricopeptide repeat domain (PPR_3) (1 of 65)
Lus10003096.g.BGIv1.0	149.504	1.05091	0.163809	6.41545	1.40407e-10	3.06868e-09	up	PTHR11730:SF39 - AMMONIUM TRANSPORTER 1 MEMBER 2 (1 of 6)
Lus10037840.g.BGIv1.0	45.6846	1.05086	0.307834	3.41373	0.00064079	0.00406454	up	PF00560//PF07714//PF08263//PF13855 - Leucine Rich Repeat (LRR_1) // Protein tyrosine kinase (Pkinase_Tyr) // Leucine rich repeat N-terminal domain (LRRNT_2) // Leucine rich repeat (LRR_8) (1 of 20)
Lus10020359.g.BGIv1.0	204.175	1.05032	0.163973	6.40546	1.4992e-10	3.26601e-09	up	PTHR24298:SF45 - CYTOCHROME P450 89A2-RELATED (1 of 10)
Lus10019661.g.BGIv1.0	25.8757	1.04958	0.404662	2.59372	0.00949434	0.0393499	up	PTHR27001:SF174 - LYSM DOMAIN RECEPTOR-LIKE KINASE 4 (1 of 4)
Lus10020803.g.BGIv1.0	45.9309	1.04929	0.331837	3.16206	0.00156658	0.00877022	up	PTHR10108//PTHR10108:SF720 - METHYLTRANSFERASE // SUBFAMILY NOT NAMED (1 of 5)
Lus10005815.g.BGIv1.0	27.0227	1.04549	0.402146	2.59977	0.00932868	0.0387585	up	PTHR14155:SF74 - RING-H2 FINGER PROTEIN ATL45-RELATED (1 of 12)
Lus10005086.g.BGIv1.0	993.592	1.04394	0.0711523	14.6719	9.75582e-49	1.69696e-46	up	PF01190 - Pollen proteins Ole e I like (Pollen_Ole_e_I) (1 of 40)
Lus10036310.g.BGIv1.0	50.059	1.04323	0.283025	3.686	0.000227809	0.00164121	up	PTHR11177:SF219 - CHITINASE-LIKE PROTEIN-RELATED (1 of 10)
Lus10039816.g.BGIv1.0	560.428	1.04264	0.0971636	10.7308	7.30003e-27	5.42598e-25	up	PTHR31692:SF5 - EXPANSIN-B1-RELATED (1 of 2)
Lus10021114.g.BGIv1.0	74.338	1.04176	0.235442	4.4247	9.65763e-06	9.67339e-05	up	PTHR33649:SF4 - PAR1 PROTEIN (1 of 5)
Lus10013061.g.BGIv1.0	35.1198	1.04126	0.350448	2.97121	0.00296625	0.0151294	up	2.3.1.4 - Glucosamine-phosphate N-acetyltransferase / Phosphoglucosamine transacetylase (1 of 4)
Lus10020767.g.BGIv1.0	31.8094	1.0378	0.352537	2.9438	0.00324205	0.0162972	up	PTHR15486:SF0 - ANCIENT UBIQUITOUS PROTEIN 1 (1 of 3)
Lus10005999.g.BGIv1.0	54.9035	1.03766	0.276643	3.75089	0.00017621	0.00130715	up	K13422 - transcription factor MYC2 (MYC2) (1 of 3)
Lus10031230.g.BGIv1.0	139.573	1.03735	0.169719	6.11217	9.82833e-10	1.91931e-08	up	PF00069//PF01453 - Protein kinase domain (Pkinase) // D-mannose binding lectin (B_lectin) (1 of 8)
Lus10004760.g.BGIv1.0	370.944	1.0365	0.116773	8.8762	6.91807e-19	3.16328e-17	up	PTHR11730:SF39 - AMMONIUM TRANSPORTER 1 MEMBER 2 (1 of 6)
Lus10004176.g.BGIv1.0	31.729	1.03624	0.351706	2.94633	0.00321574	0.0161842	up	1.14.19.6//1.3.1.35 - Delta(12)-fatty-acid desaturase / Oleoyl-CoA Delta(12) desaturase (1 of 11)
Lus10018490.g.BGIv1.0	35.4164	1.03559	0.336487	3.07765	0.00208637	0.0112234	up	?
Lus10034200.g.BGIv1.0	333.812	1.0345	0.112205	9.21976	2.97776e-20	1.54118e-18	up	PF03000 - NPH3 family (NPH3) (1 of 49)
Lus10034042.g.BGIv1.0	636.812	1.0329	0.0877174	11.7753	5.23036e-32	4.99996e-30	up	K18857 - alcohol dehydrogenase class-P (ADH1) (1 of 4)
Lus10006092.g.BGIv1.0	119.873	1.03215	0.198442	5.20125	1.97958e-07	2.75354e-06	up	PTHR33057:SF22 - OVATE FAMILY PROTEIN 1-RELATED (1 of 4)
Lus10020132.g.BGIv1.0	124.534	1.03093	0.184037	5.60178	2.12159e-08	3.39142e-07	up	PTHR10961 - PEROXISOMAL SARCOSINE OXIDASE (1 of 4)
Lus10010045.g.BGIv1.0	32.4113	1.02978	0.362562	2.84029	0.00450722	0.021428	up	PTHR12864//PTHR12864:SF23 - RAN BINDING PROTEIN 9-RELATED // SUBFAMILY NOT NAMED (1 of 4)
Lus10025493.g.BGIv1.0	128.853	1.02932	0.185182	5.55843	2.72209e-08	4.29841e-07	up	PTHR30540//PTHR30540:SF25 - OSMOTIC STRESS POTASSIUM TRANSPORTER // SUBFAMILY NOT NAMED (1 of 2)
Lus10010534.g.BGIv1.0	152.694	1.02705	0.162556	6.31812	2.64761e-10	5.57352e-09	up	PTHR23500:SF70 - SUGAR TRANSPORT PROTEIN 13 (1 of 4)
Lus10025333.g.BGIv1.0	625.891	1.02464	0.0841919	12.1703	4.47661e-34	4.6914e-32	up	K03283 - heat shock 70kDa protein 1/8 (HSPA1_8) (1 of 21)
Lus10029843.g.BGIv1.0	312.557	1.02287	0.117017	8.7412	2.3064e-18	1.01605e-16	up	K05953 - nicotianamine synthase (E2.5.1.43) (1 of 4)
Lus10040675.g.BGIv1.0	30.5859	1.0209	0.370202	2.75768	0.00582131	0.0264068	up	1.3.1.3//1.3.99.6 - Delta(4)-3-oxosteroid 5-beta-reductase / Testosterone 5-beta-reductase // 3-oxo-5-beta-steroid 4-dehydrogenase / Delta(4)-3-ketosteroid 5-beta-reductase (1 of 2)
Lus10035241.g.BGIv1.0	898.065	1.02076	0.0738097	13.8296	1.68968e-43	2.47906e-41	up	PTHR11260//PTHR11260:SF227 - GLUTATHIONE S-TRANSFERASE, GST, SUPERFAMILY, GST DOMAIN CONTAINING // SUBFAMILY NOT NAMED (1 of 1)
Lus10005394.g.BGIv1.0	94.9133	1.02052	0.229381	4.44902	8.62627e-06	8.72059e-05	up	1.10.3.1 - Catechol oxidase / Tyrosinase (1 of 7)
Lus10003601.g.BGIv1.0	95.0452	1.0194	0.20408	4.99512	5.87994e-07	7.55592e-06	up	PTHR31190:SF27 - ETHYLENE-RESPONSIVE TRANSCRIPTION FACTOR CRF1-RELATED (1 of 3)
Lus10010568.g.BGIv1.0	333.814	1.01577	0.108996	9.31938	1.17017e-20	6.25788e-19	up	PF04570 - zinc-finger of the FCS-type, C2-C2 (zf-FLZ) (1 of 18)
Lus10015538.g.BGIv1.0	163.787	1.01564	0.15719	6.46124	1.0385e-10	2.30402e-09	up	?
Lus10005361.g.BGIv1.0	77.656	1.0143	0.227173	4.46487	8.01179e-06	8.15559e-05	up	2.3.1.84 - Alcohol O-acetyltransferase / AATASE (1 of 62)
Lus10018532.g.BGIv1.0	77.3363	1.01337	0.24086	4.2073	2.58444e-05	0.000235835	up	PF12609 - Wound-induced protein (DUF3774) (1 of 27)
Lus10007251.g.BGIv1.0	33.241	1.01269	0.344661	2.93821	0.00330117	0.0165279	up	K01785 - aldose 1-epimerase (galM, GALM) (1 of 5)
Lus10024121.g.BGIv1.0	317.139	1.01253	0.117086	8.64773	5.2536e-18	2.24693e-16	up	1.14.18.1 - Tyrosinase / Tyrosine-dopa oxidase (1 of 7)
Lus10025741.g.BGIv1.0	86.217	1.01202	0.217919	4.644	3.41721e-06	3.79821e-05	up	PTHR11926//PTHR11926:SF269 - GLUCOSYL/GLUCURONOSYL TRANSFERASES // SUBFAMILY NOT NAMED (1 of 4)
Lus10028058.g.BGIv1.0	46.4213	1.01054	0.298164	3.38922	0.000700909	0.00439224	up	PF00931//PF01582 - NB-ARC domain (NB-ARC) // TIR domain (TIR) (1 of 22)
Lus10002337.g.BGIv1.0	313.072	1.01023	0.115541	8.74354	2.25918e-18	9.97856e-17	up	PTHR12565//PTHR12565:SF99 - STEROL REGULATORY ELEMENT-BINDING PROTEIN // SUBFAMILY NOT NAMED (1 of 2)
Lus10039018.g.BGIv1.0	100.433	1.00819	0.206399	4.88468	1.03599e-06	1.26574e-05	up	?
Lus10028509.g.BGIv1.0	105.557	1.00657	0.209076	4.8144	1.47644e-06	1.75864e-05	up	K13789 - geranylgeranyl diphosphate synthase, type II (GGPS) (1 of 5)
Lus10015194.g.BGIv1.0	35.6189	1.00647	0.340543	2.95549	0.00312172	0.0157955	up	PTHR12899//PTHR12899:SF10 - 39S RIBOSOMAL PROTEIN L18, MITOCHONDRIAL // SUBFAMILY NOT NAMED (1 of 2)
Lus10035696.g.BGIv1.0	166.023	1.00646	0.157081	6.40724	1.48177e-10	3.23222e-09	up	1.13.11.51//1.14.99.42 - 9-cis-epoxycarotenoid dioxygenase / VP14 // Zeaxanthin 7,8-dioxygenase / Zeaxanthin 7,8(7',8')-cleavage dioxygenase (1 of 1)
Lus10021659.g.BGIv1.0	99.1574	1.0064	0.214629	4.68901	2.74526e-06	3.1014e-05	up	PTHR31744:SF7 - NAC DOMAIN-CONTAINING PROTEIN 100-RELATED (1 of 2)
Lus10039391.g.BGIv1.0	50.725	1.00574	0.295326	3.40551	0.000660405	0.00417016	up	K13448 - calcium-binding protein CML (CML) (1 of 36)
Lus10018162.g.BGIv1.0	68.5727	1.0034	0.246732	4.06674	4.76757e-05	0.000410099	up	1.14.14.1//1.14.15.3 - Unspecific monooxygenase / Xenobiotic monooxygenase // Alkane 1-monooxygenase / Omega-hydroxylase (1 of 3)
Lus10023201.g.BGIv1.0	68.0779	1.00245	0.249453	4.01859	5.85482e-05	0.000491959	up	PTHR11638:SF94 - HEAT SHOCK PROTEIN 104 (1 of 5)
Lus10006040.g.BGIv1.0	41.8041	1.00219	0.326231	3.07204	0.00212601	0.0114017	up	PF05553 - Cotton fibre expressed protein (DUF761) (1 of 47)
Lus10042008.g.BGIv1.0	29.407	1.00215	0.376615	2.66095	0.00779204	0.0335428	up	KOG0030 - Myosin essential light chain, EF-Hand protein superfamily (1 of 1)
Lus10039067.g.BGIv1.0	60.0932	1.00165	0.255603	3.91877	8.90015e-05	0.000714744	up	?
Lus10025274.g.BGIv1.0	35.6477	1.00145	0.332789	3.00926	0.00261883	0.0136041	up	?
Lus10005420.g.BGIv1.0	59.3702	1.00123	0.2682	3.73313	0.000189112	0.00139002	up	PTHR10015:SF161 - E2F/DP FAMILY WINGED-HELIX DNA-BINDING DOMAIN-CONTAINING PROTEIN-RELATED (1 of 5)
Lus10006193.g.BGIv1.0	33.5062	-1.00052	0.340532	-2.93811	0.00330218	0.0165305	down	KOG1030//KOG1328 - Predicted Ca2+-dependent phospholipid-binding protein // Synaptic vesicle protein BAIAP3, involved in vesicle priming/regulation (1 of 1)
Lus10019399.g.BGIv1.0	90.1578	-1.00126	0.212064	-4.7215	2.34114e-06	2.68257e-05	down	2.4.1.260 - Dolichyl-P-Man:Man(7)GlcNAc(2)-PP-dolichol alpha-1,6-mannosyltransferase / Dolichyl-P-Man:Man(7)GlcNAc(2)-PP-dolichyl alpha-6-mannosyltransferase (1 of 2)
Lus10026534.g.BGIv1.0	68.5354	-1.00164	0.276506	-3.62247	0.0002918	0.00204121	down	PTHR16047 - RFWD3 PROTEIN (1 of 2)
Lus10040920.g.BGIv1.0	152.209	-1.00173	0.173579	-5.77101	7.87961e-09	1.3511e-07	down	?
Lus10039365.g.BGIv1.0	73.2445	-1.00211	0.230387	-4.34968	1.36338e-05	0.000132357	down	?
Lus10036027.g.BGIv1.0	142.872	-1.00265	0.170781	-5.87095	4.33314e-09	7.70805e-08	down	K14760 - acyl-activating enzyme 14 (AAE14) (1 of 1)
Lus10035997.g.BGIv1.0	877.221	-1.00294	0.0700755	-14.3123	1.83384e-46	3.01867e-44	down	K15166 - mediator of RNA polymerase II transcription subunit 23 (MED23) (1 of 1)
Lus10005494.g.BGIv1.0	312.304	-1.00307	0.118828	-8.44138	3.13614e-17	1.26137e-15	down	PTHR10055:SF9 - PROTEIN OVULE ABORTION 4 (1 of 1)
Lus10013018.g.BGIv1.0	164.515	-1.00339	0.155234	-6.46373	1.02153e-10	2.26936e-09	down	PTHR31385:SF1 - EXPRESSED PROTEIN-RELATED (1 of 2)
Lus10018953.g.BGIv1.0	102.918	-1.00406	0.198384	-5.06118	4.16661e-07	5.49013e-06	down	?
Lus10025997.g.BGIv1.0	33.1919	-1.00435	0.35833	-2.80287	0.00506498	0.0236107	down	?
Lus10025896.g.BGIv1.0	477.667	-1.00519	0.0939423	-10.7	1.01747e-26	7.44782e-25	down	PTHR31808:SF2 - F21O3.2 PROTEIN-RELATED (1 of 5)
Lus10017091.g.BGIv1.0	156.26	-1.00521	0.175596	-5.72454	1.03713e-08	1.7464e-07	down	PTHR10026:SF8 - CYCLIN-H (1 of 1)
Lus10005592.g.BGIv1.0	216.419	-1.00681	0.13864	-7.26204	3.81307e-13	1.07496e-11	down	PTHR11260:SF204 - GLUTATHIONE S-TRANSFERASE U21-RELATED (1 of 4)
Lus10011107.g.BGIv1.0	103.928	-1.00714	0.20377	-4.94252	7.71203e-07	9.66725e-06	down	KOG3420 - Predicted RNA methylase (1 of 2)
Lus10004806.g.BGIv1.0	29.1906	-1.00768	0.36949	-2.72721	0.00638715	0.0284722	down	PTHR10032:SF215 - TRIHELIX TRANSCRIPTION FACTOR GT-3A-RELATED (1 of 2)
Lus10033289.g.BGIv1.0	107.471	-1.00863	0.196474	-5.13368	2.84138e-07	3.84761e-06	down	K10899 - ATP-dependent DNA helicase Q1 [EC:3.6.4.12] (RECQL) (1 of 1)
Lus10015122.g.BGIv1.0	344.857	-1.00871	0.111787	-9.02346	1.82237e-19	8.81032e-18	down	4.1.3.1 - Isocitrate lyase / Isocitritase (1 of 2)
Lus10035251.g.BGIv1.0	66.033	-1.00905	0.269771	-3.7404	0.000183727	0.00135532	down	PF14817 - HAUS augmin-like complex subunit 5 (HAUS5) (1 of 5)
Lus10041801.g.BGIv1.0	474.931	-1.00916	0.0919159	-10.9792	4.8115e-28	3.89362e-26	down	PF00892 - EamA-like transporter family (EamA) (1 of 81)
Lus10007974.g.BGIv1.0	297.307	-1.01017	0.116587	-8.6645	4.53484e-18	1.94692e-16	down	PTHR12565:SF153 - TRANSCRIPTION FACTOR BIM1 (1 of 2)
Lus10006271.g.BGIv1.0	420.74	-1.01076	0.0995671	-10.1516	3.26023e-24	2.11164e-22	down	PTHR11071:SF213 - PEPTIDYLPROLYL ISOMERASE DOMAIN AND WD REPEAT-CONTAINING PROTEIN 1 (1 of 2)
Lus10034159.g.BGIv1.0	83.8824	-1.01127	0.219733	-4.60227	4.17909e-06	4.55944e-05	down	PTHR23244:SF262 - KELCH DOMAIN-CONTAINING PROTEIN 1 (1 of 2)
Lus10041671.g.BGIv1.0	634.748	-1.01221	0.0821407	-12.3229	6.81833e-35	7.3745e-33	down	PTHR24078 - DNAJ HOMOLOG SUBFAMILY C MEMBER (1 of 187)
Lus10007560.g.BGIv1.0	31.8048	-1.01245	0.356403	-2.84074	0.00450085	0.0214128	down	K14488 - SAUR family protein (SAUR) (1 of 68)
Lus10013038.g.BGIv1.0	57.0054	-1.01275	0.265334	-3.8169	0.000135137	0.00103312	down	K03183 - demethylmenaquinone methyltransferase / 2-methoxy-6-polyprenyl-1,4-benzoquinol methylase (ubiE) (1 of 1)
Lus10007349.g.BGIv1.0	105.873	-1.01424	0.212768	-4.76686	1.87123e-06	2.18192e-05	down	PTHR31062:SF20 - XYLOGLUCAN ENDOTRANSGLUCOSYLASE/HYDROLASE PROTEIN 14-RELATED (1 of 8)
Lus10034601.g.BGIv1.0	1264.66	-1.01453	0.0605754	-16.7482	5.83917e-63	1.47047e-60	down	PTHR24055:SF211 - MITOGEN-ACTIVATED PROTEIN KINASE 16-RELATED (1 of 5)
Lus10039473.g.BGIv1.0	446.05	-1.0154	0.100756	-10.0778	6.92751e-24	4.41907e-22	down	K05285 - phosphatidylinositol glycan, class N (PIGN) (1 of 1)
Lus10041752.g.BGIv1.0	25.5014	-1.01584	0.39222	-2.58997	0.00959841	0.0397129	down	PTHR24078:SF177 - PROTEIN DNJ-23-RELATED (1 of 13)
Lus10024421.g.BGIv1.0	159.712	-1.01606	0.16292	-6.23656	4.4729e-10	9.09813e-09	down	?
Lus10004995.g.BGIv1.0	25.2892	-1.01641	0.397603	-2.55635	0.0105778	0.0429955	down	?
Lus10020686.g.BGIv1.0	83.0941	-1.01765	0.236187	-4.30865	1.64254e-05	0.000156398	down	PF07887 - Calmodulin binding protein-like (Calmodulin_bind) (1 of 11)
Lus10004545.g.BGIv1.0	86.6759	-1.01792	0.21334	-4.77135	1.82997e-06	2.13749e-05	down	PTHR32060:SF8 - PEPTIDASE S41 FAMILY PROTEIN (1 of 2)
Lus10020806.g.BGIv1.0	116.915	-1.01875	0.182651	-5.57759	2.43875e-08	3.86364e-07	down	PTHR21092 - NICASTRIN (1 of 3)
Lus10025932.g.BGIv1.0	348.18	-1.01876	0.10936	-9.31564	1.2122e-20	6.47239e-19	down	6.3.2.1 - Pantoate--beta-alanine ligase (AMP-forming) / Pantothenate synthetase (1 of 2)
Lus10018612.g.BGIv1.0	34.0174	-1.01904	0.364932	-2.79242	0.00523158	0.0242324	down	PTHR24089:SF316 - ADP,ATP CARRIER PROTEIN 1, MITOCHONDRIAL (1 of 7)
Lus10023654.g.BGIv1.0	69.2613	-1.01929	0.251217	-4.05742	4.96178e-05	0.000424747	down	PTHR10460//PTHR10460:SF11 - ABL INTERACTOR // SUBFAMILY NOT NAMED (1 of 2)
Lus10043105.g.BGIv1.0	539.847	-1.01946	0.0889317	-11.4633	2.01568e-30	1.81385e-28	down	PTHR13161:SF15 - SPLICING FACTOR, SUPPRESSOR OF WHITE-APRICOT HOMOLOG (1 of 2)
Lus10039504.g.BGIv1.0	28.6514	-1.01952	0.378424	-2.69412	0.00705747	0.0309533	down	?
Lus10030161.g.BGIv1.0	308.294	-1.02099	0.119992	-8.50886	1.75655e-17	7.22558e-16	down	K01930 - folylpolyglutamate synthase (FPGS) (1 of 3)
Lus10041956.g.BGIv1.0	556.069	-1.02102	0.0948034	-10.7699	4.7772e-27	3.60641e-25	down	2.7.1.30 - Glycerol kinase / Glycerokinase (1 of 4)
Lus10023093.g.BGIv1.0	29.6875	-1.02135	0.373897	-2.73165	0.00630179	0.028159	down	PTHR11017//PTHR11017:SF163 - LEUCINE-RICH REPEAT-CONTAINING PROTEIN // SUBFAMILY NOT NAMED (1 of 10)
Lus10018431.g.BGIv1.0	28.7771	-1.02136	0.371323	-2.75059	0.00594881	0.0268749	down	?
Lus10032646.g.BGIv1.0	455.602	-1.02142	0.0946163	-10.7954	3.61879e-27	2.76281e-25	down	PTHR13161:SF15 - SPLICING FACTOR, SUPPRESSOR OF WHITE-APRICOT HOMOLOG (1 of 2)
Lus10040193.g.BGIv1.0	78.5911	-1.0218	0.230953	-4.42428	9.67659e-06	9.68951e-05	down	K09588 - cytochrome P450, family 90, subfamily A, polypeptide 1 (CYP90A1, CPD) (1 of 3)
Lus10031174.g.BGIv1.0	39.1432	-1.02203	0.318252	-3.21139	0.00132094	0.00760019	down	2.1.1.163 - Demethylmenaquinone methyltransferase / Demethylmenaquinone C-methylase (1 of 2)
Lus10021545.g.BGIv1.0	103.377	-1.02316	0.201335	-5.0819	3.7368e-07	4.9645e-06	down	K08741 - DNA mismatch repair protein MSH5 (MSH5) (1 of 2)
Lus10009673.g.BGIv1.0	329.416	-1.0236	0.120661	-8.48325	2.18983e-17	8.91385e-16	down	PTHR12565:SF94 - TRANSCRIPTION FACTOR BEE 3 (1 of 3)
Lus10025722.g.BGIv1.0	146.393	-1.02488	0.167939	-6.1027	1.04294e-09	2.03049e-08	down	K05310 - ethanolaminephosphotransferase (GPI7) (1 of 1)
Lus10036387.g.BGIv1.0	24.4389	-1.02509	0.401241	-2.55479	0.0106253	0.0431469	down	PF10184 - Uncharacterized conserved protein (DUF2358) (DUF2358) (1 of 14)
Lus10013003.g.BGIv1.0	418.763	-1.02558	0.103055	-9.95178	2.4772e-23	1.51437e-21	down	K12822 - RNA-binding protein 25 (RBM25, S164) (1 of 2)
Lus10022963.g.BGIv1.0	31.954	-1.02729	0.354302	-2.89947	0.00373789	0.0183363	down	PTHR22957:SF211 - RAB GTPASE ACTIVATOR PROTEIN-RELATED (1 of 3)
Lus10009047.g.BGIv1.0	50.2352	-1.02746	0.2883	-3.56384	0.000365463	0.0024814	down	PTHR11102:SF84 - HCP-like superfamily protein-related (1 of 3)
Lus10038245.g.BGIv1.0	39.0041	-1.02798	0.323802	-3.1747	0.0014999	0.00845117	down	PTHR11711:SF168 - ADP-RIBOSYLATION FACTOR B1C (1 of 3)
Lus10034817.g.BGIv1.0	80.5573	-1.02806	0.233751	-4.39808	1.09213e-05	0.000107981	down	PTHR13789//PTHR13789:SF234 - MONOOXYGENASE // SUBFAMILY NOT NAMED (1 of 6)
Lus10013813.g.BGIv1.0	40.1298	-1.02838	0.339026	-3.03333	0.00241868	0.0127032	down	PTHR12419//PTHR12419:SF19 - OTU DOMAIN CONTAINING PROTEIN // SUBFAMILY NOT NAMED (1 of 7)
Lus10023075.g.BGIv1.0	410.624	-1.02842	0.100083	-10.2757	9.06945e-25	6.14555e-23	down	?
Lus10041430.g.BGIv1.0	47.4141	-1.03157	0.306328	-3.36754	0.000758427	0.00469943	down	?
Lus10005958.g.BGIv1.0	349.497	-1.03184	0.122415	-8.42904	3.48502e-17	1.3967e-15	down	KOG4839 - Uncharacterized conserved protein (1 of 2)
Lus10004720.g.BGIv1.0	262.522	-1.03204	0.137146	-7.52509	5.26844e-14	1.63705e-12	down	PTHR31321:SF19 - PECTINESTERASE 68-RELATED (1 of 1)
Lus10001056.g.BGIv1.0	124.591	-1.03207	0.180052	-5.73208	9.92082e-09	1.6764e-07	down	PTHR12741:SF16 - CALLOSE SYNTHASE 7-RELATED (1 of 5)
Lus10028435.g.BGIv1.0	381.192	-1.03266	0.103126	-10.0135	1.32954e-23	8.27776e-22	down	PTHR10641:SF588 - TRANSCRIPTION REPRESSOR MYB4 (1 of 3)
Lus10041724.g.BGIv1.0	171.451	-1.03285	0.15541	-6.64595	3.01269e-11	7.0895e-10	down	PTHR12069 - DNA-DIRECTED RNA POLYMERASES III 80 KDA POLYPEPTIDE RNA POLYMERASE III SUBUNIT 5 (1 of 2)
Lus10001807.g.BGIv1.0	30.1259	-1.03291	0.371285	-2.78199	0.00540265	0.0248348	down	PTHR27001:SF1 - BRASSINOSTEROID INSENSITIVE 1-ASSOCIATED RECEPTOR KINASE 1-RELATED (1 of 7)
Lus10018076.g.BGIv1.0	93.6112	-1.03342	0.224659	-4.59996	4.2257e-06	4.59988e-05	down	PTHR31832:SF5 - B-BOX TYPE ZINC FINGER-CONTAINING PROTEIN (1 of 2)
Lus10000998.g.BGIv1.0	39.7311	-1.03393	0.316642	-3.26529	0.0010935	0.00647259	down	PTHR10150 - DNA REPAIR ENDONUCLEASE XPF (1 of 2)
Lus10038388.g.BGIv1.0	412.152	-1.03395	0.0987195	-10.4736	1.1426e-25	7.94989e-24	down	PTHR31116:SF4 - 3-METHYLADENINE GLYCOSYLASE I-RELATED (1 of 2)
Lus10007348.g.BGIv1.0	227.578	-1.0344	0.144693	-7.14892	8.74646e-13	2.39181e-11	down	PF00249//PF00722 - Myb-like DNA-binding domain (Myb_DNA-binding) // Glycosyl hydrolases family 16 (Glyco_hydro_16) (1 of 1)
Lus10036682.g.BGIv1.0	262.601	-1.03517	0.129821	-7.97379	1.53882e-15	5.53008e-14	down	PTHR24092:SF85 - PHOSPHOLIPID-TRANSPORTING ATPASE 3 (1 of 4)
Lus10001011.g.BGIv1.0	196.758	-1.03543	0.145905	-7.09658	1.27884e-12	3.44408e-11	down	K11420 - euchromatic histone-lysine N-methyltransferase (EHMT) (1 of 9)
Lus10015938.g.BGIv1.0	231.532	-1.03577	0.133545	-7.75597	8.76713e-15	2.93499e-13	down	PF10184 - Uncharacterized conserved protein (DUF2358) (DUF2358) (1 of 14)
Lus10026572.g.BGIv1.0	599.268	-1.03624	0.0921252	-11.2482	2.36349e-29	2.03979e-27	down	PTHR24351:SF81 - PHOTOTROPIN-2 (1 of 4)
Lus10036522.g.BGIv1.0	158.571	-1.03714	0.166982	-6.21109	5.26176e-10	1.06068e-08	down	PTHR10566:SF44 - ATH SUBFAMILY PROTEIN ATH8 (1 of 4)
Lus10018451.g.BGIv1.0	153.15	-1.03719	0.165095	-6.28237	3.33453e-10	6.89515e-09	down	3.1.30.1 - Aspergillus nuclease S(1) / Single-stranded-nucleate endonuclease (1 of 5)
Lus10022774.g.BGIv1.0	300.559	-1.03728	0.116342	-8.91581	4.84255e-19	2.25395e-17	down	PTHR23041:SF63 - C3HC4 ZINC FINGER DOMAIN-CONTAINING PROTEIN-RELATED (1 of 2)
Lus10040743.g.BGIv1.0	189.909	-1.03781	0.161411	-6.42965	1.27899e-10	2.81313e-09	down	2.7.11.24 - Mitogen-activated protein kinase / Stress-activated protein kinase (1 of 27)
Lus10030010.g.BGIv1.0	40.6199	-1.03863	0.315692	-3.29	0.00100189	0.00600085	down	PTHR23503:SF8 - GLUCOSE TRANSPORTER TYPE 1 (1 of 2)
Lus10002760.g.BGIv1.0	169.828	-1.03906	0.165983	-6.26	3.84982e-10	7.8687e-09	down	K12486 - stromal membrane-associated protein (SMAP) (1 of 8)
Lus10042456.g.BGIv1.0	23.4376	-1.03953	0.413941	-2.5113	0.0120289	0.047637	down	PTHR22572//PTHR22572:SF98 - SUGAR-1-PHOSPHATE GUANYL TRANSFERASE // SUBFAMILY NOT NAMED (1 of 2)
Lus10028392.g.BGIv1.0	168.438	-1.03961	0.158396	-6.56335	5.26116e-11	1.20039e-09	down	PTHR23257//PTHR23257:SF492 - SERINE-THREONINE PROTEIN KINASE // SUBFAMILY NOT NAMED (1 of 2)
Lus10012040.g.BGIv1.0	55.2048	-1.04206	0.280593	-3.71377	0.000204196	0.00148889	down	PTHR12644 - ARP2/3 COMPLEX 16 KD SUBUNIT P16-ARC (1 of 4)
Lus10036074.g.BGIv1.0	155.454	-1.04283	0.177907	-5.86165	4.58277e-09	8.11362e-08	down	PTHR11607//PTHR11607:SF36 - ALPHA-MANNOSIDASE // SUBFAMILY NOT NAMED (1 of 4)
Lus10003305.g.BGIv1.0	169.496	-1.04289	0.158744	-6.56965	5.04335e-11	1.15303e-09	down	PTHR11614:SF92 - ALPHA/BETA-HYDROLASES SUPERFAMILY PROTEIN-RELATED (1 of 4)
Lus10030853.g.BGIv1.0	2321.36	-1.04317	0.0446699	-23.3529	1.28841e-120	8.20329e-118	down	PTHR10788:SF14 - ALPHA,ALPHA-TREHALOSE-PHOSPHATE SYNTHASE [UDP-FORMING] 10-RELATED (1 of 4)
Lus10041983.g.BGIv1.0	30.4141	-1.04345	0.387498	-2.69279	0.00708567	0.0310364	down	PTHR35698:SF1 - DNA-BINDING PROTEIN RHL1 (1 of 2)
Lus10027054.g.BGIv1.0	164.677	-1.04345	0.157641	-6.61919	3.61169e-11	8.3937e-10	down	PTHR27001:SF194 - PROTEIN KINASE FAMILY PROTEIN (1 of 7)
Lus10041093.g.BGIv1.0	32.8414	-1.04406	0.353711	-2.95173	0.00315994	0.0159534	down	?
Lus10001501.g.BGIv1.0	22.796	-1.04412	0.418272	-2.49626	0.0125511	0.0493806	down	K14484 - auxin-responsive protein IAA (IAA) (1 of 21)
Lus10020818.g.BGIv1.0	31.5328	-1.04593	0.377901	-2.76774	0.00564471	0.0257267	down	2.1.2.10 - Aminomethyltransferase / Tetrahydrofolate aminomethyltransferase (1 of 4)
Lus10008247.g.BGIv1.0	223.271	-1.04602	0.138665	-7.54353	4.57422e-14	1.42923e-12	down	K11583 - serine/threonine-protein phosphatase 2A regulatory subunit B'' (PPP2R3) (1 of 11)
Lus10009364.g.BGIv1.0	34.3641	-1.04644	0.347938	-3.00754	0.00263371	0.0136604	down	PTHR24361:SF334 - MITOGEN-ACTIVATED PROTEIN KINASE KINASE KINASE 19-RELATED (1 of 15)
Lus10000316.g.BGIv1.0	197.66	-1.04645	0.148953	-7.02539	2.13472e-12	5.58853e-11	down	PTHR11289:SF0 - BREAST CANCER TYPE 2 SUSCEPTIBILITY PROTEIN (1 of 3)
Lus10015589.g.BGIv1.0	184.575	-1.0465	0.14558	-7.18847	6.55192e-13	1.81374e-11	down	PTHR11361:SF81 - DNA MISMATCH REPAIR PROTEIN MUTS, TYPE 2 (1 of 2)
Lus10003912.g.BGIv1.0	112.312	-1.04652	0.19094	-5.48088	4.2322e-08	6.50345e-07	down	?
Lus10036122.g.BGIv1.0	519.061	-1.04667	0.0910085	-11.5008	1.30759e-30	1.18615e-28	down	K00253 - isovaleryl-CoA dehydrogenase (IVD, ivd) (1 of 1)
Lus10042044.g.BGIv1.0	104.324	-1.0471	0.204564	-5.11867	3.0769e-07	4.14657e-06	down	PTHR20961//PTHR20961:SF12 - GLYCOSYLTRANSFERASE // SUBFAMILY NOT NAMED (1 of 6)
Lus10023604.g.BGIv1.0	30.4335	-1.0471	0.371847	-2.81594	0.00486345	0.0228257	down	PTHR30620:SF51 - BETA-D-GLUCAN EXOHYDROLASE-LIKE PROTEIN-RELATED (1 of 6)
Lus10000373.g.BGIv1.0	168.222	-1.04723	0.164688	-6.35889	2.03219e-10	4.34028e-09	down	PTHR14194//PTHR14194:SF44 - NITROGEN METABOLIC REGULATION PROTEIN NMR-RELATED // SUBFAMILY NOT NAMED (1 of 2)
Lus10021436.g.BGIv1.0	30.2383	-1.04888	0.365837	-2.86706	0.00414306	0.0199708	down	PTHR31374:SF16 - AUXIN-RESPONSIVE FAMILY PROTEIN (1 of 5)
Lus10009826.g.BGIv1.0	34.0487	-1.0489	0.349649	-2.99986	0.00270104	0.0139539	down	3.4.19.5//3.5.1.1 - Asparaginase / L-asparagine amidohydrolase (1 of 2)
Lus10023757.g.BGIv1.0	24.9223	-1.04917	0.408497	-2.56836	0.0102182	0.0417549	down	2.3.1.35 - Glutamate N-acetyltransferase / Ornithine transacetylase (1 of 3)
Lus10015420.g.BGIv1.0	71.9013	-1.04942	0.235847	-4.44956	8.60467e-06	8.70136e-05	down	PTHR24089:SF388 - MITOCHONDRIAL ARGININE TRANSPORTER BAC1 (1 of 2)
Lus10017596.g.BGIv1.0	95.3673	-1.04942	0.207829	-5.04944	4.43109e-07	5.80914e-06	down	PTHR10288//PTHR10288:SF130 - KH DOMAIN CONTAINING RNA BINDING PROTEIN // SUBFAMILY NOT NAMED (1 of 3)
Lus10040349.g.BGIv1.0	161.903	-1.05042	0.158071	-6.64523	3.02751e-11	7.11632e-10	down	PTHR22957:SF269 - RABGAP/TBC DOMAIN-CONTAINING PROTEIN (1 of 4)
Lus10026945.g.BGIv1.0	41.3311	-1.05058	0.344087	-3.05326	0.00226373	0.0120128	down	K11507 - centromere protein O (CENPO) (1 of 1)
Lus10004453.g.BGIv1.0	39.317	-1.05079	0.375234	-2.80037	0.00510444	0.0237684	down	K10750 - chromatin assembly factor 1 subunit A (CHAF1A) (1 of 4)
Lus10009092.g.BGIv1.0	383.853	-1.05089	0.104862	-10.0217	1.22417e-23	7.63576e-22	down	PTHR31087:SF11 - PROTEIN LURP-ONE-RELATED 1-RELATED (1 of 13)
Lus10036176.g.BGIv1.0	44.5234	-1.05091	0.296216	-3.54778	0.000388494	0.00261671	down	PTHR11452//PTHR11452:SF36 - ALPHA-GALACTOSIDASE/ALPHA-N-ACETYLGALACTOSAMINIDASE // SUBFAMILY NOT NAMED (1 of 2)
Lus10021721.g.BGIv1.0	241.602	-1.05136	0.135222	-7.77505	7.54148e-15	2.54233e-13	down	K04773 - protease IV [EC:3.4.21.-] (sppA) (1 of 3)
Lus10034224.g.BGIv1.0	70.7584	-1.0516	0.237939	-4.41961	9.88783e-06	9.87174e-05	down	PTHR10994:SF67 - RETICULON-LIKE PROTEIN B16 (1 of 2)
Lus10015212.g.BGIv1.0	129.194	-1.05227	0.178242	-5.90363	3.55595e-09	6.39976e-08	down	PF00225//PF00307 - Kinesin motor domain (Kinesin) // Calponin homology (CH) domain (CH) (1 of 14)
Lus10029661.g.BGIv1.0	182.199	-1.05228	0.150667	-6.98415	2.86592e-12	7.42213e-11	down	PTHR23086:SF33 - PHOSPHATIDYLINOSITOL 4-PHOSPHATE 5-KINASE 1-RELATED (1 of 5)
Lus10005263.g.BGIv1.0	164.039	-1.0533	0.153763	-6.85015	7.37732e-12	1.83725e-10	down	2.7.4.21 - Inositol-hexakisphosphate kinase / IP6K (1 of 4)
Lus10036100.g.BGIv1.0	58.5217	-1.05367	0.286104	-3.68284	0.000230647	0.00165918	down	K04730 - interleukin-1 receptor-associated kinase 1 (IRAK1) (1 of 25)
Lus10032053.g.BGIv1.0	129.138	-1.05392	0.186381	-5.65466	1.56159e-08	2.55557e-07	down	2.1.1.257 - tRNA (pseudouridine(54)-N(1))-methyltransferase / M(1)-Psi methyltransferase (1 of 6)
Lus10005490.g.BGIv1.0	330.714	-1.05494	0.115377	-9.14347	6.04826e-20	3.05537e-18	down	PTHR10682:SF22 - NUCLEAR POLY(A) POLYMERASE (1 of 2)
Lus10008521.g.BGIv1.0	119.466	-1.05567	0.182203	-5.7939	6.87711e-09	1.19131e-07	down	2.7.8.7 - Holo-[acyl-carrier-protein] synthase / PPTase (1 of 4)
Lus10020186.g.BGIv1.0	374.17	-1.05586	0.103917	-10.1606	2.97232e-24	1.93258e-22	down	PF01131//PF01396//PF01751//PF13368 - DNA topoisomerase (Topoisom_bac) // Topoisomerase DNA binding C4 zinc finger (zf-C4_Topoisom) // Toprim domain (Toprim) // Topoisomerase C-terminal repeat (Toprim_C_rpt) (1 of 1)
Lus10023590.g.BGIv1.0	64.712	-1.05648	0.256802	-4.11398	3.889e-05	0.000341756	down	PTHR13619:SF0 - MITOCHONDRIAL TRANSLOCATOR ASSEMBLY AND MAINTENANCE PROTEIN 41 HOMOLOG (1 of 3)
Lus10041704.g.BGIv1.0	470.376	-1.05666	0.0992422	-10.6473	1.7943e-26	1.29377e-24	down	PF00612//PF03859 - IQ calmodulin-binding motif (IQ) // CG-1 domain (CG-1) (1 of 3)
Lus10031060.g.BGIv1.0	50.976	-1.05869	0.294641	-3.59314	0.000326717	0.00225252	down	PTHR11089:SF29 - P-LOOP CONTAINING NUCLEOSIDE TRIPHOSPHATE HYDROLASES SUPERFAMILY PROTEIN (1 of 3)
Lus10001704.g.BGIv1.0	32.7315	-1.05889	0.390685	-2.71035	0.00672124	0.0297103	down	K01874 - methionyl-tRNA synthetase (MARS, metG) (1 of 4)
Lus10034552.g.BGIv1.0	29.1943	-1.06013	0.372445	-2.8464	0.00442173	0.0211018	down	?
Lus10032659.g.BGIv1.0	54.9504	-1.06019	0.301006	-3.52214	0.00042807	0.00284579	down	PTHR10353//PTHR10353:SF42 - GLYCOSYL HYDROLASE // SUBFAMILY NOT NAMED (1 of 4)
Lus10027199.g.BGIv1.0	872.575	-1.06046	0.0695027	-15.2579	1.45947e-52	2.79828e-50	down	PTHR31080:SF19 - PLANT INVERTASE/PECTIN METHYLESTERASE INHIBITOR SUPERFAMILY PROTEIN (1 of 5)
Lus10011295.g.BGIv1.0	76.2863	-1.06052	0.235303	-4.50704	6.57391e-06	6.84047e-05	down	PF05055 - Protein of unknown function (DUF677) (DUF677) (1 of 11)
Lus10020949.g.BGIv1.0	64.7378	-1.06055	0.248401	-4.2695	1.95907e-05	0.00018333	down	PTHR24078:SF247 - CHAPERONE PROTEIN DNAJ 1, MITOCHONDRIAL (1 of 1)
Lus10004689.g.BGIv1.0	145.109	-1.06064	0.168829	-6.28236	3.33468e-10	6.89515e-09	down	K14684 - solute carrier family 25 (mitochondrial phosphate transporter), member 23/24/25/41 (SLC25A23S) (1 of 17)
Lus10014642.g.BGIv1.0	106.813	-1.06073	0.194197	-5.46212	4.70482e-08	7.17417e-07	down	PTHR31490:SF2 - GLYCOSYL HYDROLASE FAMILY 10 PROTEIN (1 of 4)
Lus10024664.g.BGIv1.0	126.299	-1.06139	0.176435	-6.01579	1.79014e-09	3.37664e-08	down	PTHR33698:SF1 - NUCLEAR TRANSPORT FACTOR 2 (NTF2) FAMILY PROTEIN (1 of 2)
Lus10024067.g.BGIv1.0	189.515	-1.06187	0.159738	-6.64758	2.97958e-11	7.02136e-10	down	PTHR24078 - DNAJ HOMOLOG SUBFAMILY C MEMBER (1 of 187)
Lus10018407.g.BGIv1.0	305.587	-1.06228	0.127955	-8.30202	1.0236e-16	3.95211e-15	down	PTHR27002:SF84 - ATP BINDING / PROTEIN KINASE-RELATED (1 of 21)
Lus10028228.g.BGIv1.0	77.6618	-1.06303	0.255351	-4.16302	3.14069e-05	0.00028127	down	PTHR15245:SF26 - PHOSPHATIDYLINOSITOL 3-AND 4-KINASE-LIKE PROTEIN (1 of 2)
Lus10041562.g.BGIv1.0	196.906	-1.06318	0.143319	-7.41825	1.18681e-13	3.57117e-12	down	PTHR24296:SF15 - CYTOCHROME P450, FAMILY 94, SUBFAMILY B, POLYPEPTIDE 2 (1 of 2)
Lus10013584.g.BGIv1.0	51.0084	-1.06319	0.281801	-3.77286	0.00016139	0.00121052	down	PTHR22849:SF38 - E3 UBIQUITIN-PROTEIN LIGASE PUB22-RELATED (1 of 5)
Lus10024656.g.BGIv1.0	61.6799	-1.06342	0.277494	-3.83223	0.000126986	0.000976781	down	KOG0315//KOG1446 - G-protein beta subunit-like protein (contains WD40 repeats) // Histone H3 (Lys4) methyltransferase complex and RNA cleavage factor II complex, subunit SWD2 (1 of 1)
Lus10001217.g.BGIv1.0	280.69	-1.06347	0.126943	-8.37756	5.40354e-17	2.14017e-15	down	PTHR12176:SF19 - S-ADENOSYL-L-METHIONINE-DEPENDENT METHYLTRANSFERASE DOMAIN-CONTAINING PROTEIN (1 of 2)
Lus10023799.g.BGIv1.0	439.206	-1.06408	0.104759	-10.1574	3.07124e-24	1.99306e-22	down	5.4.99.45 - tRNA pseudouridine(38/39) synthase / Pseudouridine synthase 3 (1 of 1)
Lus10023788.g.BGIv1.0	177.458	-1.06494	0.169134	-6.29645	3.04544e-10	6.35156e-09	down	PTHR10992:SF752 - ALPHA/BETA-HYDROLASE-LIKE PROTEIN (1 of 2)
Lus10009965.g.BGIv1.0	50.2139	-1.06585	0.285809	-3.72926	0.000192042	0.0014088	down	?
Lus10033935.g.BGIv1.0	36.1101	-1.06601	0.340482	-3.13089	0.00174277	0.00960942	down	PTHR11214//PTHR11214:SF7 - BETA-1,3-N-ACETYLGLUCOSAMINYLTRANSFERASE // SUBFAMILY NOT NAMED (1 of 4)
Lus10021124.g.BGIv1.0	59.994	-1.0661	0.266415	-4.00163	6.29082e-05	0.00052377	down	KOG1099 - SAM-dependent methyltransferase/cell division protein FtsJ (1 of 1)
Lus10011046.g.BGIv1.0	118.832	-1.06957	0.189962	-5.63047	1.79723e-08	2.90736e-07	down	PTHR13428 - INNER NUCLEAR MEMBRANE PROTEIN MAN1 LEM DOMAIN CONTAINING PROTEIN (1 of 1)
Lus10038308.g.BGIv1.0	117.086	-1.0701	0.190697	-5.61149	2.00594e-08	3.21723e-07	down	PTHR10217:SF465 - CYCLIC NUCLEOTIDE-GATED ION CHANNEL 11-RELATED (1 of 2)
Lus10032154.g.BGIv1.0	771.469	-1.07018	0.0776829	-13.7763	3.53973e-43	5.12653e-41	down	PTHR30540:SF18 - POTASSIUM TRANSPORTER 8 (1 of 2)
Lus10008489.g.BGIv1.0	32.1647	-1.07114	0.390981	-2.73963	0.00615082	0.0276267	down	PTHR11913:SF30 - ACTIN-DEPOLYMERIZING FACTOR 10-RELATED (1 of 9)
Lus10019719.g.BGIv1.0	127.942	-1.07188	0.178073	-6.0193	1.75175e-09	3.31165e-08	down	1.14.13.90 - Zeaxanthin epoxidase / Zea-epoxidase (1 of 9)
Lus10037485.g.BGIv1.0	565.826	-1.07251	0.0982416	-10.917	9.55612e-28	7.60546e-26	down	K13096 - splicing factor 4 (SF4) (1 of 2)
Lus10016860.g.BGIv1.0	58.3478	-1.07313	0.267493	-4.01179	6.02606e-05	0.000505091	down	PF00954//PF01453//PF07714//PF08276 - S-locus glycoprotein domain (S_locus_glycop) // D-mannose binding lectin (B_lectin) // Protein tyrosine kinase (Pkinase_Tyr) // PAN-like domain (PAN_2) (1 of 37)
Lus10040192.g.BGIv1.0	41.6863	-1.07326	0.334673	-3.20689	0.0013418	0.00769527	down	K10802 - high mobility group protein B1 (HMGB1) (1 of 3)
Lus10034468.g.BGIv1.0	153.696	-1.07371	0.160281	-6.69892	2.09964e-11	5.01787e-10	down	PTHR13789:SF185 - FAD/NAD(P)-BINDING OXIDOREDUCTASE FAMILY PROTEIN (1 of 11)
Lus10024171.g.BGIv1.0	74.6229	-1.07445	0.248941	-4.3161	1.58812e-05	0.000151559	down	PTHR10502:SF104 - ANNEXIN D4 (1 of 2)
Lus10008202.g.BGIv1.0	54.2757	-1.07458	0.299064	-3.59315	0.000326702	0.00225252	down	1.13.11.58 - Linoleate 9S-lipoxygenase / Linoleate 9-lipoxygenase (1 of 8)
Lus10036173.g.BGIv1.0	71.7678	-1.07468	0.241929	-4.44214	8.90686e-06	8.97736e-05	down	?
Lus10014928.g.BGIv1.0	76.0586	-1.07504	0.256358	-4.1935	2.74679e-05	0.0002489	down	PTHR13547:SF3 - PROTEINACEOUS RNASE P 1, CHLOROPLASTIC/MITOCHONDRIAL (1 of 5)
Lus10029885.g.BGIv1.0	242.824	-1.07554	0.12867	-8.35889	6.33098e-17	2.48706e-15	down	PTHR24012:SF442 - SERINE/ARGININE-RICH SPLICING FACTOR 4 (1 of 6)
Lus10024044.g.BGIv1.0	247.377	-1.0767	0.145492	-7.40039	1.35782e-13	4.05485e-12	down	PF00612//PF03859 - IQ calmodulin-binding motif (IQ) // CG-1 domain (CG-1) (1 of 3)
Lus10043271.g.BGIv1.0	45.2252	-1.0771	0.299339	-3.59824	0.000320374	0.00221265	down	PTHR31194:SF13 - ETHYLENE-RESPONSIVE TRANSCRIPTION FACTOR SHINE 2-RELATED (1 of 6)
Lus10041386.g.BGIv1.0	346.396	-1.07764	0.108103	-9.96863	2.09083e-23	1.28516e-21	down	K11430 - histone-lysine N-methyltransferase EZH2 (EZH2) (1 of 2)
Lus10025440.g.BGIv1.0	31.2816	-1.07798	0.399897	-2.69565	0.0070252	0.0308438	down	2.1.1.240 - Trans-resveratrol di-O-methyltransferase / Resveratrol O-methyltransferase (1 of 4)
Lus10020520.g.BGIv1.0	75.4212	-1.07872	0.248219	-4.34584	1.38741e-05	0.000134381	down	4.3.1.19 - Threonine ammonia-lyase / Threonine dehydratase (1 of 5)
Lus10030345.g.BGIv1.0	31.8424	-1.07938	0.377598	-2.85853	0.00425605	0.0204209	down	PF00931//PF07725//PF13676 - NB-ARC domain (NB-ARC) // Leucine Rich Repeat (LRR_3) // TIR domain (TIR_2) (1 of 4)
Lus10043238.g.BGIv1.0	114.458	-1.07956	0.190446	-5.66855	1.44011e-08	2.37149e-07	down	PTHR11062:SF77 - EXOSTOSIN FAMILY PROTEIN (1 of 2)
Lus10033386.g.BGIv1.0	307.008	-1.07969	0.118981	-9.07448	1.14222e-19	5.63513e-18	down	K01537 - Ca2+-transporting ATPase (E3.6.3.8) (1 of 16)
Lus10015041.g.BGIv1.0	26.4594	-1.07992	0.401735	-2.68815	0.00718501	0.0314106	down	?
Lus10007537.g.BGIv1.0	3661.08	-1.08057	0.039467	-27.3791	4.86512e-165	5.66116e-162	down	K06617 - raffinose synthase (E2.4.1.82) (1 of 3)
Lus10014025.g.BGIv1.0	33.8988	-1.08095	0.378924	-2.85268	0.00433528	0.0207598	down	PF07816 - Protein of unknown function (DUF1645) (DUF1645) (1 of 18)
Lus10027981.g.BGIv1.0	30.145	-1.08109	0.357958	-3.02015	0.00252646	0.0131791	down	PF12166 - Piezo non-specific cation channel, R-Ras-binding domain (Piezo_RRas_bdg) (1 of 7)
Lus10019931.g.BGIv1.0	230.714	-1.08118	0.149461	-7.23391	4.69274e-13	1.31525e-11	down	PTHR23012//PTHR23012:SF79 - MEMBRANE ASSOCIATED RING FINGER // SUBFAMILY NOT NAMED (1 of 2)
Lus10004542.g.BGIv1.0	31.8612	-1.08169	0.38077	-2.84079	0.00450015	0.0214125	down	PTHR21535//PTHR21535:SF50 - MAGNESIUM AND COBALT TRANSPORT PROTEIN/MITOCHONDRIAL IMPORT INNER MEMBRANE TRANSLOCASE SUBUNIT TIM8 // SUBFAMILY NOT NAMED (1 of 1)
Lus10042672.g.BGIv1.0	84.9072	-1.08374	0.215819	-5.02153	5.12621e-07	6.64045e-06	down	PTHR33509:SF5 - LATE EMBRYOGENESIS ABUNDANT 3 (LEA3) FAMILY PROTEIN (1 of 6)
Lus10001801.g.BGIv1.0	182.601	-1.08556	0.184829	-5.87328	4.27248e-09	7.60416e-08	down	?
Lus10029970.g.BGIv1.0	155.735	-1.08672	0.179161	-6.06562	1.31442e-09	2.52591e-08	down	PTHR23500:SF62 - SUGAR TRANSPORTER ERD6-LIKE 14-RELATED (1 of 22)
Lus10028390.g.BGIv1.0	514.432	-1.08828	0.0925892	-11.7538	6.74935e-32	6.43381e-30	down	2.8.1.1 - Thiosulfate sulfurtransferase / Thiosulfate thiotransferase (1 of 12)
Lus10005601.g.BGIv1.0	30.5119	-1.08844	0.393746	-2.76431	0.0057043	0.0259564	down	?
Lus10000685.g.BGIv1.0	99.1714	-1.08894	0.202155	-5.38666	7.17785e-08	1.06516e-06	down	3.1.21.7 - Deoxyribonuclease V / Escherichia coli endodeoxyribonuclease V (1 of 2)
Lus10009807.g.BGIv1.0	260.979	-1.08911	0.12823	-8.49345	2.00593e-17	8.20485e-16	down	?
Lus10006665.g.BGIv1.0	101.466	-1.08926	0.198631	-5.48384	4.162e-08	6.41016e-07	down	PF03181 - BURP domain (BURP) (1 of 18)
Lus10029883.g.BGIv1.0	338.07	-1.09036	0.134439	-8.11044	5.04352e-16	1.87232e-14	down	3.1.1.80 - Acetylajmaline esterase / Acetylajmalan esterase (1 of 1)
Lus10000791.g.BGIv1.0	276.332	-1.09042	0.128153	-8.50877	1.75795e-17	7.22558e-16	down	K01409 - N6-L-threonylcarbamoyladenine synthase [EC:2.3.1.234] (KAE1, tsaD, QRI7) (1 of 3)
Lus10018432.g.BGIv1.0	111.414	-1.09066	0.198748	-5.48765	4.07307e-08	6.28754e-07	down	PTHR34049:SF1 - F-BOX PROTEIN SKIP27 (1 of 3)
Lus10006533.g.BGIv1.0	74.4967	-1.09104	0.239824	-4.54933	5.38161e-06	5.72156e-05	down	PTHR15180:SF1 - GENERAL TRANSCRIPTION FACTOR 3C POLYPEPTIDE 1 (1 of 6)
Lus10026501.g.BGIv1.0	537.008	-1.09138	0.0951827	-11.4662	1.95031e-30	1.75971e-28	down	PTHR23012//PTHR23012:SF79 - MEMBRANE ASSOCIATED RING FINGER // SUBFAMILY NOT NAMED (1 of 2)
Lus10013856.g.BGIv1.0	158.976	-1.09166	0.17936	-6.08642	1.15464e-09	2.23414e-08	down	PTHR24351:SF81 - PHOTOTROPIN-2 (1 of 4)
Lus10019448.g.BGIv1.0	201.088	-1.0922	0.151406	-7.21375	5.44314e-13	1.51675e-11	down	PTHR31561:SF3 - 3-KETOACYL-COA SYNTHASE 11 (1 of 1)
Lus10026525.g.BGIv1.0	164.991	-1.09239	0.162063	-6.74053	1.57813e-11	3.8175e-10	down	PTHR12419//PTHR12419:SF19 - OTU DOMAIN CONTAINING PROTEIN // SUBFAMILY NOT NAMED (1 of 7)
Lus10020087.g.BGIv1.0	63.6273	-1.09262	0.251454	-4.3452	1.39149e-05	0.000134737	down	PTHR22912:SF180 - 3-PHENYLPROPIONATE/CINNAMIC ACID DIOXYGENASE FERREDOXIN--NAD(+) REDUCTASE COMPONENT (1 of 5)
Lus10039428.g.BGIv1.0	466.045	-1.09378	0.0961635	-11.3741	5.62507e-30	4.96906e-28	down	KOG4510 - Permease of the drug/metabolite transporter (DMT) superfamily (1 of 4)
Lus10034209.g.BGIv1.0	98.811	-1.09399	0.204852	-5.3404	9.27438e-08	1.35424e-06	down	?
Lus10011048.g.BGIv1.0	51.0417	-1.09408	0.321383	-3.4043	0.00066333	0.0041855	down	PF00646 - F-box domain (F-box) (1 of 240)
Lus10011127.g.BGIv1.0	146.651	-1.09422	0.164616	-6.6471	2.98926e-11	7.03925e-10	down	PTHR21068:SF5 - GENOMIC DNA, CHROMOSOME 3, P1 CLONE: MIL23-RELATED (1 of 4)
Lus10005771.g.BGIv1.0	347.114	-1.09465	0.117397	-9.32434	1.11675e-20	5.9817e-19	down	K16908 - chloroplast NAD(P)H dehydrogenase (CRR1) (1 of 1)
Lus10041087.g.BGIv1.0	174.068	-1.09499	0.163778	-6.68583	2.29618e-11	5.4605e-10	down	?
Lus10006382.g.BGIv1.0	53.2371	-1.09552	0.283182	-3.8686	0.000109462	0.000856634	down	PTHR11097:SF8 - EXOSOME COMPLEX COMPONENT RRP42 (1 of 4)
Lus10037273.g.BGIv1.0	173.808	-1.0959	0.159849	-6.85587	7.08784e-12	1.77039e-10	down	PTHR24286:SF10 - ABSCISIC ACID 8'-HYDROXYLASE 1-RELATED (1 of 5)
Lus10039614.g.BGIv1.0	79.0928	-1.09664	0.237	-4.62715	3.70729e-06	4.08832e-05	down	PTHR11085:SF6 - NAD-DEPENDENT PROTEIN DEACETYLASE SIRTUIN-4 (1 of 2)
Lus10019489.g.BGIv1.0	672.498	-1.09669	0.0824673	-13.2985	2.36284e-40	3.03171e-38	down	K04728 - ataxia telangiectasia mutated family protein (ATM, TEL1) (1 of 1)
Lus10025598.g.BGIv1.0	258.062	-1.09689	0.13187	-8.31793	8.95142e-17	3.47602e-15	down	PTHR10285:SF53 - URIDINE KINASE (1 of 2)
Lus10032529.g.BGIv1.0	40.8481	-1.09721	0.307852	-3.56407	0.00036515	0.00247977	down	PTHR35137:SF1 - CRUMPLED LEAF (1 of 4)
Lus10016205.g.BGIv1.0	80.3542	-1.0975	0.222392	-4.93498	8.01581e-07	1.00072e-05	down	PF05678 - VQ motif (VQ) (1 of 42)
Lus10043027.g.BGIv1.0	20.8207	-1.09813	0.439892	-2.49635	0.0125478	0.0493734	down	PTHR22763//PTHR22763:SF87 - RING ZINC FINGER PROTEIN // SUBFAMILY NOT NAMED (1 of 1)
Lus10027335.g.BGIv1.0	58.7113	-1.09818	0.261008	-4.20746	2.58254e-05	0.000235725	down	PTHR11926:SF374 - UDP-GLYCOSYLTRANSFERASE 71C4 (1 of 1)
Lus10001449.g.BGIv1.0	46.1524	-1.09837	0.292846	-3.75067	0.000176362	0.00130799	down	K13508 - glycerol-3-phosphate acyltransferase (GPAT) (1 of 9)
Lus10006006.g.BGIv1.0	71.9465	-1.09885	0.23801	-4.61681	3.89683e-06	4.27915e-05	down	?
Lus10004693.g.BGIv1.0	235.259	-1.09985	0.14441	-7.6162	2.61244e-14	8.35608e-13	down	KOG4378 - Nuclear protein COP1 (1 of 4)
Lus10007438.g.BGIv1.0	25.3485	-1.10033	0.432166	-2.54607	0.0108942	0.0441008	down	PTHR23168 - MITOTIC SPINDLE ASSEMBLY CHECKPOINT PROTEIN MAD1 MITOTIC ARREST DEFICIENT-LIKE PROTEIN 1 (1 of 3)
Lus10028236.g.BGIv1.0	150.782	-1.10285	0.176017	-6.26559	3.71409e-10	7.60971e-09	down	PTHR22950:SF278 - AMINO ACID PERMEASE 1-RELATED (1 of 10)
Lus10003354.g.BGIv1.0	59.5371	-1.10289	0.261133	-4.22349	2.40543e-05	0.000220766	down	PTHR19302:SF37 - GAMMA-TUBULIN COMPLEX COMPONENT 6 (1 of 4)
Lus10021848.g.BGIv1.0	60.4523	-1.10334	0.255226	-4.32301	1.53918e-05	0.000147305	down	?
Lus10018938.g.BGIv1.0	59.6702	-1.10412	0.268297	-4.11528	3.86713e-05	0.000340277	down	PTHR33021:SF9 - BASIC BLUE PROTEIN (1 of 7)
Lus10035582.g.BGIv1.0	288.628	-1.10624	0.11954	-9.25416	2.15924e-20	1.13318e-18	down	PF13837 - Myb/SANT-like DNA-binding domain (Myb_DNA-bind_4) (1 of 54)
Lus10018603.g.BGIv1.0	158.883	-1.10717	0.16807	-6.58758	4.47049e-11	1.02904e-09	down	PF04720 - PDDEXK-like family of unknown function (PDDEXK_6) (1 of 23)
Lus10037973.g.BGIv1.0	58.9176	-1.10743	0.271282	-4.0822	4.46116e-05	0.000386302	down	PTHR22883:SF19 - PROTEIN S-ACYLTRANSFERASE 15-RELATED (1 of 2)
Lus10002139.g.BGIv1.0	901.017	-1.10782	0.0684903	-16.1749	7.58088e-59	1.70544e-56	down	PF01966//PF02824//PF04607 - HD domain (HD) // TGS domain (TGS) // Region found in RelA / SpoT proteins (RelA_SpoT) (1 of 1)
Lus10030184.g.BGIv1.0	52.2252	-1.10798	0.286374	-3.86898	0.00010929	0.000855684	down	PTHR12802:SF43 - PROTEIN CCA1-RELATED (1 of 4)
Lus10035985.g.BGIv1.0	78.7304	-1.10992	0.255182	-4.3495	1.36445e-05	0.000132392	down	K08739 - DNA mismatch repair protein MLH3 (MLH3) (1 of 2)
Lus10014405.g.BGIv1.0	785.274	-1.11031	0.0737242	-15.0604	2.95167e-51	5.53356e-49	down	PTHR23120 - MAESTRO-RELATED HEAT DOMAIN-CONTAINING (1 of 2)
Lus10040108.g.BGIv1.0	77.0203	-1.11093	0.244669	-4.54053	5.61137e-06	5.93592e-05	down	PTHR19282//PTHR19282:SF262 - TETRASPANIN // SUBFAMILY NOT NAMED (1 of 4)
Lus10007960.g.BGIv1.0	44.4935	-1.11123	0.340116	-3.26722	0.0010861	0.00643327	down	PF14009 - Domain of unknown function (DUF4228) (DUF4228) (1 of 47)
Lus10004081.g.BGIv1.0	50.4691	-1.1123	0.282001	-3.94429	8.0036e-05	0.000649859	down	PF01535//PF13041//PF14432 - PPR repeat (PPR) // PPR repeat family (PPR_2) // DYW family of nucleic acid deaminases (DYW_deaminase) (1 of 70)
Lus10000811.g.BGIv1.0	159.907	-1.11241	0.183845	-6.05082	1.44108e-09	2.74896e-08	down	PF00892 - EamA-like transporter family (EamA) (1 of 81)
Lus10018484.g.BGIv1.0	2998.31	-1.11333	0.0484945	-22.9579	1.22975e-116	7.15482e-114	down	PTHR11772//PTHR11772:SF15 - ASPARAGINE SYNTHETASE // SUBFAMILY NOT NAMED (1 of 2)
Lus10007052.g.BGIv1.0	133.383	-1.11345	0.174942	-6.36468	1.95702e-10	4.20367e-09	down	PTHR31235:SF27 - PEROXIDASE 62-RELATED (1 of 5)
Lus10012221.g.BGIv1.0	164.367	-1.11364	0.158642	-7.01986	2.22096e-12	5.8008e-11	down	K13141 - integrator complex subunit 4 (INTS4) (1 of 2)
Lus10016648.g.BGIv1.0	78.332	-1.11411	0.226714	-4.91419	8.91489e-07	1.10195e-05	down	PTHR11132:SF38 - GB (1 of 2)
Lus10026990.g.BGIv1.0	236.405	-1.11428	0.140453	-7.93345	2.13135e-15	7.53114e-14	down	PF01131//PF01396//PF13368 - DNA topoisomerase (Topoisom_bac) // Topoisomerase DNA binding C4 zinc finger (zf-C4_Topoisom) // Topoisomerase C-terminal repeat (Toprim_C_rpt) (1 of 1)
Lus10009485.g.BGIv1.0	20.6742	-1.11517	0.441399	-2.52644	0.0115224	0.0460036	down	PTHR10903:SF65 - AIG1 DOMAIN-CONTAINING PROTEIN-RELATED (1 of 10)
Lus10035957.g.BGIv1.0	148.348	-1.11524	0.16376	-6.81024	9.74359e-12	2.39648e-10	down	KOG1427 - Uncharacterized conserved protein, contains RCC1 domain (1 of 30)
Lus10008129.g.BGIv1.0	234.206	-1.11611	0.131136	-8.51112	1.72265e-17	7.10645e-16	down	K13464 - jasmonate ZIM domain-containing protein (JAZ) (1 of 10)
Lus10006822.g.BGIv1.0	229.586	-1.11736	0.13383	-8.34913	6.87657e-17	2.69199e-15	down	PTHR33471:SF5 - EXPRESSED PROTEIN (1 of 2)
Lus10016469.g.BGIv1.0	299.037	-1.11874	0.121236	-9.22784	2.76145e-20	1.43582e-18	down	PTHR11260:SF303 - GLUTATHIONE S-TRANSFERASE U1-RELATED (1 of 16)
Lus10019083.g.BGIv1.0	34.0683	-1.11985	0.341029	-3.28374	0.00102439	0.0061161	down	5.1.3.1 - Ribulose-phosphate 3-epimerase / Xylulose phosphate 3-epimerase (1 of 7)
Lus10012020.g.BGIv1.0	82.791	-1.12047	0.221344	-5.06214	4.14573e-07	5.46689e-06	down	PF03110 - SBP domain (SBP) (1 of 32)
Lus10024643.g.BGIv1.0	175.325	-1.12048	0.152294	-7.35732	1.87644e-13	5.49657e-12	down	PTHR14499:SF11 - PROTEIN VM106R.1 (1 of 4)
Lus10024665.g.BGIv1.0	152.62	-1.12066	0.174134	-6.43559	1.22999e-10	2.70926e-09	down	PF09808 - Small nuclear RNA activating complex (SNAPc), subunit SNAP43 (SNAPc_SNAP43) (1 of 3)
Lus10027622.g.BGIv1.0	103.605	-1.12147	0.203027	-5.52373	3.31881e-08	5.18487e-07	down	?
Lus10029713.g.BGIv1.0	25.8352	-1.12293	0.403552	-2.7826	0.00539249	0.0247982	down	PTHR10797:SF14 - CCR4-ASSOCIATED FACTOR 1 HOMOLOG 10-RELATED (1 of 5)
Lus10001265.g.BGIv1.0	445.807	-1.12449	0.100541	-11.1844	4.86308e-29	4.15455e-27	down	K13424 - WRKY transcription factor 33 (WRKY33) (1 of 3)
Lus10001856.g.BGIv1.0	407.932	-1.1245	0.101878	-11.0377	2.51522e-28	2.07521e-26	down	PTHR22912:SF180 - 3-PHENYLPROPIONATE/CINNAMIC ACID DIOXYGENASE FERREDOXIN--NAD(+) REDUCTASE COMPONENT (1 of 5)
Lus10023472.g.BGIv1.0	86.1498	-1.12454	0.226281	-4.96964	6.70777e-07	8.51915e-06	down	PTHR22957:SF269 - RABGAP/TBC DOMAIN-CONTAINING PROTEIN (1 of 4)
Lus10035366.g.BGIv1.0	68.9708	-1.12458	0.24148	-4.65702	3.20826e-06	3.58605e-05	down	PTHR11514:SF43 - TRANSCRIPTION FACTOR MYC3-RELATED (1 of 6)
Lus10042487.g.BGIv1.0	485.598	-1.12464	0.0987295	-11.3912	4.62822e-30	4.12082e-28	down	PTHR24282:SF53 - CYTOCHROME P450-RELATED (1 of 5)
Lus10024499.g.BGIv1.0	23.5266	-1.12525	0.443904	-2.53489	0.0112481	0.0451276	down	PTHR32295:SF13 - CALMODULIN BINDING PROTEIN IQD22 (1 of 3)
Lus10010570.g.BGIv1.0	182.49	-1.12548	0.161587	-6.96516	3.28041e-12	8.45663e-11	down	2.3.1.82 - Aminoglycoside 6'-N-acetyltransferase / Kanamycin 6'-N-acetyltransferase (1 of 1)
Lus10034575.g.BGIv1.0	90.0911	-1.12676	0.228755	-4.9256	8.41002e-07	1.04568e-05	down	?
Lus10035886.g.BGIv1.0	58.623	-1.12692	0.287653	-3.91762	8.9429e-05	0.000718007	down	PTHR23108:SF0 - METHYLTRANSFERASE-LIKE PROTEIN 22 (1 of 2)
Lus10022638.g.BGIv1.0	33.0074	-1.12735	0.351046	-3.2114	0.00132091	0.00760019	down	PTHR31223:SF14 - CYTOKININ RIBOSIDE 5'-MONOPHOSPHATE PHOSPHORIBOHYDROLASE LOG5 (1 of 4)
Lus10006269.g.BGIv1.0	97.1897	-1.12844	0.210075	-5.37161	7.80379e-08	1.15297e-06	down	K02324 - DNA polymerase epsilon subunit 1 (POLE1) (1 of 2)
Lus10028325.g.BGIv1.0	120.078	-1.12953	0.190908	-5.91659	3.28682e-09	5.93984e-08	down	?
Lus10018559.g.BGIv1.0	264.819	-1.13084	0.127836	-8.84599	9.07203e-19	4.1092e-17	down	2.1.2.5 - Glutamate formimidoyltransferase / Glutamate formyltransferase (1 of 4)
Lus10033887.g.BGIv1.0	29.9333	-1.13098	0.363474	-3.1116	0.00186079	0.0101837	down	PTHR13476:SF2 - HISTONE ACETYLTRANSFERASE SUBUNIT NUA4-DOMAIN CONTAINING PROTEIN (1 of 4)
Lus10004990.g.BGIv1.0	451.962	-1.13146	0.0942628	-12.0033	3.41437e-33	3.43934e-31	down	K09284 - AP2-like factor, euAP2 lineage (AP2) (1 of 10)
Lus10011523.g.BGIv1.0	419.087	-1.13205	0.0984348	-11.5005	1.31159e-30	1.18658e-28	down	PTHR24413:SF129 - BTB AND MATH DOMAIN-CONTAINING PROTEIN 42 (1 of 3)
Lus10007411.g.BGIv1.0	194.269	-1.13293	0.14771	-7.67	1.71999e-14	5.59701e-13	down	PTHR19957:SF129 - SYNTAXIN-71-RELATED (1 of 7)
Lus10024293.g.BGIv1.0	2225.16	-1.13309	0.0490537	-23.0989	4.7529e-118	2.86405e-115	down	PTHR10438:SF274 - THIOREDOXIN H1 (1 of 6)
Lus10019726.g.BGIv1.0	321.277	-1.13323	0.115138	-9.84244	7.3897e-23	4.41355e-21	down	PTHR11351 - ACYL-COA DESATURASE (1 of 12)
Lus10031897.g.BGIv1.0	102.322	-1.13375	0.216976	-5.22521	1.73957e-07	2.43172e-06	down	?
Lus10010191.g.BGIv1.0	54.8457	-1.13401	0.277561	-4.08561	4.39613e-05	0.000381258	down	PTHR11802:SF31 - SERINE CARBOXYPEPTIDASE-LIKE 34 (1 of 4)
Lus10001800.g.BGIv1.0	300.898	-1.13486	0.134236	-8.45424	2.80916e-17	1.13256e-15	down	?
Lus10025854.g.BGIv1.0	23.2626	-1.1352	0.433828	-2.61671	0.00887828	0.0372803	down	2.4.1.115//2.4.1.91 - Anthocyanidin 3-O-glucosyltransferase / Uridine diphosphoglucose-anthocyanidin 3-O-glucosyltransferase // Flavonol 3-O-glucosyltransferase / UDP-glucose flavonol 3-O-glucosyltransferase (1 of 1)
Lus10010375.g.BGIv1.0	36.5594	-1.13521	0.350045	-3.24305	0.00118256	0.00690928	down	PF12530 - Protein of unknown function (DUF3730) (DUF3730) (1 of 3)
Lus10001654.g.BGIv1.0	545.732	-1.13547	0.0889239	-12.769	2.44308e-37	2.86256e-35	down	PTHR14155:SF102 - RING ZINC FINGER-CONTAINING PROTEIN (1 of 5)
Lus10003475.g.BGIv1.0	40.9709	-1.13607	0.324239	-3.5038	0.000458678	0.00302188	down	3.6.1.12 - dCTP diphosphatase / Deoxycytidine-triphosphatase (1 of 4)
Lus10043141.g.BGIv1.0	255.436	-1.13694	0.133428	-8.52098	1.58207e-17	6.54253e-16	down	K13173 - arginine and glutamate-rich protein 1 (ARGLU1) (1 of 2)
Lus10011904.g.BGIv1.0	70.0756	-1.13704	0.260544	-4.3641	1.27645e-05	0.000124599	down	PTHR21567:SF9 - CLIP-ASSOCIATING PROTEIN (1 of 5)
Lus10020674.g.BGIv1.0	23.8033	-1.13772	0.414479	-2.74495	0.00605199	0.0272485	down	PTHR32278:SF2 - F-BOX PROTEIN PP2-B13-RELATED (1 of 9)
Lus10043384.g.BGIv1.0	218.943	-1.13775	0.144242	-7.8878	3.07556e-15	1.07549e-13	down	PTHR18640:SF9 - SODIUM/METABOLITE COTRANSPORTER BASS4, CHLOROPLASTIC-RELATED (1 of 3)
Lus10017602.g.BGIv1.0	70.897	-1.13821	0.235414	-4.83491	1.33204e-06	1.59792e-05	down	PTHR12565:SF128 - TRANSCRIPTION FACTOR BHLH75 (1 of 2)
Lus10028133.g.BGIv1.0	278.318	-1.13888	0.127805	-8.91112	5.05185e-19	2.34814e-17	down	KOG3958 - Putative dynamitin (1 of 2)
Lus10009768.g.BGIv1.0	53.0306	-1.13912	0.34136	-3.337	0.000846894	0.0051735	down	PF14290 - Domain of unknown function (DUF4370) (DUF4370) (1 of 4)
Lus10041683.g.BGIv1.0	1911.43	-1.13973	0.0601581	-18.9456	4.80152e-80	1.57308e-77	down	PF00005//PF01061//PF08370 - ABC transporter (ABC_tran) // ABC-2 type transporter (ABC2_membrane) // Plant PDR ABC transporter associated (PDR_assoc) (1 of 4)
Lus10009404.g.BGIv1.0	57.5061	-1.14	0.262124	-4.34908	1.36712e-05	0.000132606	down	PTHR23029:SF43 - DBJ (1 of 3)
Lus10026389.g.BGIv1.0	38.0839	-1.14079	0.341674	-3.33884	0.000841302	0.00514773	down	PTHR33405:SF1 - PROTEIN FLC EXPRESSOR (1 of 2)
Lus10041102.g.BGIv1.0	882.139	-1.14173	0.0807641	-14.1365	2.26114e-45	3.53251e-43	down	PTHR22847//PTHR22847:SF453 - WD40 REPEAT PROTEIN // SUBFAMILY NOT NAMED (1 of 4)
Lus10009168.g.BGIv1.0	175.241	-1.14192	0.152179	-7.50379	6.19976e-14	1.9141e-12	down	PTHR34543:SF1 - ABSCISIC ACID (ABA)-DEFICIENT 4 PROTEIN (1 of 2)
Lus10015240.g.BGIv1.0	35.2558	-1.14247	0.361607	-3.15942	0.00158085	0.00883939	down	PTHR11654//PTHR11654:SF131 - OLIGOPEPTIDE TRANSPORTER-RELATED // SUBFAMILY NOT NAMED (1 of 2)
Lus10025038.g.BGIv1.0	30.3641	-1.14325	0.375228	-3.04682	0.00231274	0.0122344	down	PTHR13561//PTHR13561:SF5 - DNA REPLICATION REGULATOR DPB11-RELATED // SUBFAMILY NOT NAMED (1 of 5)
Lus10016603.g.BGIv1.0	644.041	-1.14336	0.0844063	-13.5459	8.38295e-42	1.15935e-39	down	PTHR23416:SF56 - SERINE ACETYLTRANSFERASE 1, CHLOROPLASTIC-RELATED (1 of 2)
Lus10029757.g.BGIv1.0	25.8063	-1.14354	0.398493	-2.86966	0.00410917	0.0198403	down	PTHR11695//PTHR11695:SF432 - ALCOHOL DEHYDROGENASE RELATED // SUBFAMILY NOT NAMED (1 of 2)
Lus10018764.g.BGIv1.0	47.7333	-1.14365	0.304359	-3.75756	0.000171576	0.00128008	down	PTHR31734:SF11 - AUXIN-RESPONSIVE PROTEIN IAA1-RELATED (1 of 6)
Lus10003271.g.BGIv1.0	337.312	-1.14447	0.112542	-10.1693	2.71799e-24	1.77063e-22	down	PTHR32332:SF20 - 2-NITROPROPANE DIOXYGENASE-LIKE PROTEIN (1 of 2)
Lus10032834.g.BGIv1.0	96.1394	-1.14481	0.211842	-5.4041	6.51356e-08	9.71707e-07	down	PTHR15678:SF6 - UPF0378 PROTEIN KIAA0100 (1 of 3)
Lus10020182.g.BGIv1.0	104.717	-1.14553	0.218243	-5.24886	1.53042e-07	2.15723e-06	down	PF13837 - Myb/SANT-like DNA-binding domain (Myb_DNA-bind_4) (1 of 54)
Lus10043378.g.BGIv1.0	48.5392	-1.14614	0.289139	-3.96399	7.37084e-05	0.000604004	down	PTHR24296:SF7 - CYTOCHROME P450 94C1 (1 of 2)
Lus10006155.g.BGIv1.0	74.8595	-1.14638	0.256083	-4.47658	7.58492e-06	7.74911e-05	down	2.7.7.79 - tRNA(His) guanylyltransferase / Histidine tRNA guanylyltransferase (1 of 2)
Lus10012455.g.BGIv1.0	133.942	-1.14727	0.179204	-6.40204	1.53317e-10	3.33572e-09	down	PTHR22883:SF70 - PROTEIN S-ACYLTRANSFERASE 23-RELATED (1 of 1)
Lus10033780.g.BGIv1.0	25.7984	-1.1478	0.426601	-2.69057	0.00713309	0.0312157	down	?
Lus10013740.g.BGIv1.0	20.0196	-1.14818	0.44161	-2.59999	0.00932252	0.0387424	down	?
Lus10001900.g.BGIv1.0	30.5777	-1.14825	0.376702	-3.04817	0.00230236	0.012191	down	2.7.10.1//2.7.11.1 - Receptor protein-tyrosine kinase / Receptor protein tyrosine kinase // Non-specific serine/threonine protein kinase / Threonine-specific protein kinase (1 of 53)
Lus10033630.g.BGIv1.0	162.657	-1.14912	0.156734	-7.33166	2.27321e-13	6.58452e-12	down	PTHR13301:SF69 - BASIC HELIX-LOOP-HELIX DOMAIN-CONTAINING PROTEIN (1 of 4)
Lus10031460.g.BGIv1.0	28.0773	-1.14952	0.387889	-2.96352	0.00304142	0.0154474	down	PTHR31100:SF17 - AT-HOOK MOTIF NUCLEAR LOCALIZED PROTEIN 16 (1 of 4)
Lus10018188.g.BGIv1.0	104.869	-1.14979	0.218609	-5.25957	1.44391e-07	2.04468e-06	down	PTHR13308:SF17 - GENOMIC DNA, CHROMOSOME 3, P1 CLONE: MJK13 (1 of 2)
Lus10014851.g.BGIv1.0	22.7892	-1.15015	0.417698	-2.75354	0.00589538	0.0266818	down	?
Lus10033865.g.BGIv1.0	65.4064	-1.15032	0.255319	-4.50542	6.62406e-06	6.89054e-05	down	PTHR13140:SF471 - MYOSIN-16 (1 of 3)
Lus10013884.g.BGIv1.0	153.714	-1.1505	0.160372	-7.17395	7.28645e-13	2.00719e-11	down	3.2.1.63 - 1,2-alpha-L-fucosidase / Almond emulsin fucosidase II (1 of 3)
Lus10003466.g.BGIv1.0	328.074	-1.15077	0.116475	-9.88	5.08333e-23	3.0577e-21	down	PTHR19305 - SYNAPTOSOMAL ASSOCIATED PROTEIN (1 of 7)
Lus10004026.g.BGIv1.0	39.5597	-1.15095	0.316836	-3.63264	0.000280535	0.00197058	down	PTHR11260//PTHR11260:SF290 - GLUTATHIONE S-TRANSFERASE, GST, SUPERFAMILY, GST DOMAIN CONTAINING // SUBFAMILY NOT NAMED (1 of 2)
Lus10020444.g.BGIv1.0	22.9572	-1.15104	0.421135	-2.73319	0.00627232	0.0280492	down	PTHR17901:SF14 - MAGNESIUM-DEPENDENT PHOSPHATASE 1 (1 of 2)
Lus10030623.g.BGIv1.0	412.516	-1.15162	0.101563	-11.339	8.41172e-30	7.35372e-28	down	PTHR18806 - RBM25 PROTEIN (1 of 4)
Lus10025736.g.BGIv1.0	31.5984	-1.15177	0.356615	-3.22973	0.00123907	0.00719913	down	PTHR12736:SF14 - LANC-LIKE PROTEIN GCL1 (1 of 2)
Lus10022523.g.BGIv1.0	78.5729	-1.15178	0.242606	-4.74755	2.05899e-06	2.38356e-05	down	PTHR22807:SF30 - RIBOSOMAL RNA METHYLTRANSFERASE NOP2-RELATED (1 of 4)
Lus10021514.g.BGIv1.0	23.9206	-1.15185	0.436948	-2.63612	0.00838601	0.035651	down	K10532 - heparan-alpha-glucosaminide N-acetyltransferase (HGSNAT) (1 of 5)
Lus10038011.g.BGIv1.0	629.417	-1.15382	0.0806908	-14.2993	2.21078e-46	3.6215e-44	down	PTHR23339 - TYROSINE SPECIFIC PROTEIN PHOSPHATASE AND DUAL SPECIFICITY PROTEIN PHOSPHATASE (1 of 2)
Lus10035747.g.BGIv1.0	64.6562	-1.15423	0.27851	-4.14431	3.40831e-05	0.000303225	down	?
Lus10001393.g.BGIv1.0	201.33	-1.15449	0.145188	-7.95171	1.83956e-15	6.55501e-14	down	?
Lus10036490.g.BGIv1.0	51.1546	-1.15465	0.288532	-4.00181	6.28609e-05	0.000523505	down	PTHR23076:SF58 - FTSH EXTRACELLULAR PROTEASE FAMILY PROTEIN (1 of 2)
Lus10033777.g.BGIv1.0	62.3975	-1.15505	0.265139	-4.35638	1.32229e-05	0.000128664	down	PTHR27007:SF24 - L-TYPE LECTIN-DOMAIN CONTAINING RECEPTOR KINASE IX.1-RELATED (1 of 23)
Lus10018138.g.BGIv1.0	69.0227	-1.1555	0.267897	-4.31323	1.60886e-05	0.000153451	down	PTHR23421:SF75 - BETA-GALACTOSIDASE 16 (1 of 3)
Lus10036153.g.BGIv1.0	1550.82	-1.15581	0.0548557	-21.0701	1.49746e-98	6.64891e-96	down	PTHR24223:SF251 - ABC TRANSPORTER C FAMILY MEMBER 11-RELATED (1 of 3)
Lus10003913.g.BGIv1.0	480.6	-1.15611	0.0961488	-12.0242	2.6527e-33	2.68815e-31	down	KOG1527 - Uroporphyrin III methyltransferase (1 of 1)
Lus10007418.g.BGIv1.0	261.455	-1.15699	0.129729	-8.91851	4.72619e-19	2.20284e-17	down	PTHR14083 - YIP1 INTERACTING FACTOR HOMOLOG YIF1 PROTEIN (1 of 4)
Lus10027974.g.BGIv1.0	89.0993	-1.15865	0.216087	-5.36196	8.23236e-08	1.21258e-06	down	PF13041 - PPR repeat family (PPR_2) (1 of 719)
Lus10019119.g.BGIv1.0	40.1532	-1.15885	0.368059	-3.14853	0.00164094	0.00912547	down	PF01535//PF13041 - PPR repeat (PPR) // PPR repeat family (PPR_2) (1 of 308)
Lus10006035.g.BGIv1.0	102.641	-1.15904	0.207609	-5.5828	2.36675e-08	3.76016e-07	down	?
Lus10017572.g.BGIv1.0	114.686	-1.15946	0.198976	-5.82715	5.63825e-09	9.85817e-08	down	?
Lus10037484.g.BGIv1.0	754.379	-1.16182	0.0743151	-15.6337	4.29345e-55	9.05516e-53	down	PF00010 - Helix-loop-helix DNA-binding domain (HLH) (1 of 164)
Lus10038244.g.BGIv1.0	660.84	-1.16214	0.0854062	-13.6072	3.6272e-42	5.07883e-40	down	PF13369 - Transglutaminase-like superfamily (Transglut_core2) (1 of 3)
Lus10022778.g.BGIv1.0	47.1904	-1.16403	0.288864	-4.02968	5.58523e-05	0.000471774	down	KOG2459 - GPI transamidase complex, GPI17/PIG-S component, involved in glycosylphosphatidylinositol anchor biosynthesis (1 of 3)
Lus10006087.g.BGIv1.0	562.077	-1.16574	0.0858444	-13.5797	5.28122e-42	7.33394e-40	down	?
Lus10042983.g.BGIv1.0	129.634	-1.16615	0.1808	-6.44995	1.11887e-10	2.47421e-09	down	KOG2558 - Negative regulator of histones (1 of 1)
Lus10006082.g.BGIv1.0	106.807	-1.16686	0.203009	-5.74784	9.03932e-09	1.53591e-07	down	PTHR14025:SF20 - FANCONI ANEMIA GROUP M PROTEIN (1 of 3)
Lus10038646.g.BGIv1.0	576.707	-1.16693	0.0866106	-13.4733	2.24594e-41	2.98383e-39	down	2.4.1.224 - Glucuronosyl-N-acetylglucosaminyl-proteoglycan 4-alpha-N- acetylglucosaminyltransferase / acetylglucosaminyltransferase (1 of 4)
Lus10037766.g.BGIv1.0	392.598	-1.16704	0.105019	-11.1127	1.08816e-28	9.13428e-27	down	PTHR11246//PTHR11246:SF11 - PRE-MRNA SPLICING FACTOR // SUBFAMILY NOT NAMED (1 of 2)
Lus10002432.g.BGIv1.0	19.298	-1.1672	0.459446	-2.54044	0.0110712	0.0446298	down	PTHR13561//PTHR13561:SF5 - DNA REPLICATION REGULATOR DPB11-RELATED // SUBFAMILY NOT NAMED (1 of 5)
Lus10024074.g.BGIv1.0	389.333	-1.16777	0.106545	-10.9604	5.92626e-28	4.77283e-26	down	PTHR31429:SF3 - WRKY TRANSCRIPTION FACTOR 40-RELATED (1 of 4)
Lus10038192.g.BGIv1.0	22.0869	-1.16808	0.450671	-2.59187	0.00954557	0.0395282	down	PF02519 - Auxin responsive protein (Auxin_inducible) (1 of 133)
Lus10015533.g.BGIv1.0	67.691	-1.17004	0.278838	-4.19611	2.71534e-05	0.000246249	down	?
Lus10002604.g.BGIv1.0	358.836	-1.17025	0.108201	-10.8155	2.90627e-27	2.23399e-25	down	PTHR15678//PTHR15678:SF8 - ANTIGEN MLAA-22-RELATED // SUBFAMILY NOT NAMED (1 of 4)
Lus10017967.g.BGIv1.0	73.682	-1.17038	0.23092	-5.06836	4.01258e-07	5.3079e-06	down	2.7.1.30 - Glycerol kinase / Glycerokinase (1 of 4)
Lus10018087.g.BGIv1.0	122.4	-1.17108	0.186276	-6.2868	3.24079e-10	6.71748e-09	down	PTHR24413:SF75 - BTB/POZ AND TAZ DOMAIN-CONTAINING PROTEIN 2 (1 of 4)
Lus10021484.g.BGIv1.0	84.336	-1.17197	0.233683	-5.01523	5.29705e-07	6.85387e-06	down	PTHR23270//PTHR23270:SF9 - PROGRAMMED CELL DEATH PROTEIN 11 PRE-RRNA PROCESSING PROTEIN RRP5 // SUBFAMILY NOT NAMED (1 of 2)
Lus10006029.g.BGIv1.0	300.431	-1.17241	0.118799	-9.86889	5.67892e-23	3.40988e-21	down	PTHR10682:SF22 - NUCLEAR POLY(A) POLYMERASE (1 of 2)
Lus10030659.g.BGIv1.0	47.8262	-1.17334	0.312426	-3.75557	0.000172947	0.00128775	down	PTHR11014//PTHR11014:SF85 - PEPTIDASE M20 FAMILY MEMBER // SUBFAMILY NOT NAMED (1 of 4)
Lus10033043.g.BGIv1.0	120.478	-1.17353	0.184458	-6.36207	1.99054e-10	4.26753e-09	down	K16280 - E3 ubiquitin-protein ligase RGLG [EC:6.3.2.19] (RGLG) (1 of 6)
Lus10028994.g.BGIv1.0	123.639	-1.17415	0.18499	-6.34707	2.1945e-10	4.65745e-09	down	K14408 - cleavage stimulation factor subunit 3 (CSTF3, RNA14) (1 of 2)
Lus10002528.g.BGIv1.0	72.284	-1.17426	0.256559	-4.57695	4.71807e-06	5.08987e-05	down	?
Lus10041759.g.BGIv1.0	52.6343	-1.17428	0.286201	-4.10297	4.07877e-05	0.000356852	down	2.7.7.3 - Pantetheine-phosphate adenylyltransferase / PPAT (1 of 5)
Lus10005979.g.BGIv1.0	34.111	-1.1753	0.359032	-3.27354	0.00106211	0.00631333	down	K18195 - rhamnogalacturonan endolyase (RGL4, rhiE) (1 of 7)
Lus10043363.g.BGIv1.0	227.848	-1.17614	0.136295	-8.62938	6.16834e-18	2.62155e-16	down	K11824 - AP-2 complex subunit alpha (AP2A) (1 of 4)
Lus10034180.g.BGIv1.0	254.121	-1.17715	0.129541	-9.0871	1.01713e-19	5.0401e-18	down	PTHR10797:SF3 - CCR4-ASSOCIATED FACTOR 1 HOMOLOG 11-RELATED (1 of 1)
Lus10002472.g.BGIv1.0	129.176	-1.1773	0.180709	-6.51489	7.27442e-11	1.63541e-09	down	PTHR14319 - FIVE-SPAN TRANSMEMBRANE PROTEIN M83 (1 of 2)
Lus10018573.g.BGIv1.0	269.85	-1.17783	0.134723	-8.74267	2.27671e-18	1.00428e-16	down	PTHR15052:SF2 - GENERAL TRANSCRIPTION FACTOR 3C POLYPEPTIDE 2 (1 of 2)
Lus10037732.g.BGIv1.0	241.792	-1.17823	0.133822	-8.80448	1.31465e-18	5.89149e-17	down	PF00954//PF01453//PF07714//PF08276 - S-locus glycoprotein domain (S_locus_glycop) // D-mannose binding lectin (B_lectin) // Protein tyrosine kinase (Pkinase_Tyr) // PAN-like domain (PAN_2) (1 of 37)
Lus10035127.g.BGIv1.0	173.586	-1.17912	0.15445	-7.63429	2.27071e-14	7.29764e-13	down	PF12576 - Protein of unknown function (DUF3754) (DUF3754) (1 of 8)
Lus10000403.g.BGIv1.0	48.2601	-1.18032	0.307273	-3.84126	0.000122404	0.000945204	down	K01265 - methionyl aminopeptidase [EC:3.4.11.18] (map) (1 of 3)
Lus10003517.g.BGIv1.0	255.898	-1.1812	0.128133	-9.21856	3.01106e-20	1.55452e-18	down	K17108 - non-lysosomal glucosylceramidase (GBA2) (1 of 5)
Lus10015769.g.BGIv1.0	33.4622	-1.18458	0.343975	-3.44378	0.00057364	0.00369136	down	PF11820 - Protein of unknown function (DUF3339) (DUF3339) (1 of 20)
Lus10041790.g.BGIv1.0	94.0461	-1.18552	0.218029	-5.43743	5.40551e-08	8.1761e-07	down	PTHR10992//PTHR10992:SF804 - ALPHA/BETA HYDROLASE FOLD-CONTAINING PROTEIN // SUBFAMILY NOT NAMED (1 of 2)
Lus10036428.g.BGIv1.0	397.671	-1.18654	0.102238	-11.6056	3.86129e-31	3.57965e-29	down	PTHR22847//PTHR22847:SF453 - WD40 REPEAT PROTEIN // SUBFAMILY NOT NAMED (1 of 4)
Lus10020437.g.BGIv1.0	2374.27	-1.18701	0.0455981	-26.0319	2.15642e-149	1.91496e-146	down	K13260 - isoflavone 2'-hydroxylase (CYP81E1_7) (1 of 1)
Lus10000826.g.BGIv1.0	365.447	-1.18713	0.111039	-10.6911	1.1208e-26	8.18643e-25	down	K13091 - RNA-binding protein 39 (RBM39, RNPC2) (1 of 5)
Lus10026924.g.BGIv1.0	255.349	-1.18807	0.133808	-8.87896	6.74903e-19	3.09437e-17	down	PTHR10217:SF544 - CYCLIC NUCLEOTIDE-GATED ION CHANNEL 14-RELATED (1 of 8)
Lus10015422.g.BGIv1.0	90.9635	-1.18857	0.209279	-5.67936	1.35198e-08	2.23641e-07	down	PF00069//PF08276 - Protein kinase domain (Pkinase) // PAN-like domain (PAN_2) (1 of 1)
Lus10042671.g.BGIv1.0	137.268	-1.18891	0.186432	-6.37717	1.8039e-10	3.8946e-09	down	?
Lus10001006.g.BGIv1.0	75.6928	-1.1893	0.246609	-4.82262	1.41687e-06	1.69247e-05	down	PTHR10795//PTHR10795:SF384 - PROPROTEIN CONVERTASE SUBTILISIN/KEXIN // SUBFAMILY NOT NAMED (1 of 4)
Lus10011191.g.BGIv1.0	4461.19	-1.19102	0.0392171	-30.37	1.36831e-202	1.9239e-199	down	PTHR11772//PTHR11772:SF15 - ASPARAGINE SYNTHETASE // SUBFAMILY NOT NAMED (1 of 2)
Lus10018353.g.BGIv1.0	745.356	-1.19124	0.075745	-15.727	9.88262e-56	2.13775e-53	down	K05350 - beta-glucosidase (bglB) (1 of 6)
Lus10017050.g.BGIv1.0	407.205	-1.19336	0.107116	-11.1407	7.94609e-29	6.72032e-27	down	PTHR31279:SF3 - (PHI-1) PROTEIN, PUTATIVE-RELATED (1 of 2)
Lus10002097.g.BGIv1.0	129.417	-1.19351	0.182151	-6.55231	5.6653e-11	1.28565e-09	down	PTHR12741:SF7 - 1,3-BETA-GLUCAN SYNTHASE COMPONENT FKS1-RELATED (1 of 3)
Lus10009643.g.BGIv1.0	1108.39	-1.19435	0.0657668	-18.1605	1.06142e-73	3.1419e-71	down	PTHR18934:SF112 - DEA(D/H)-BOX RNA HELICASE FAMILY PROTEIN (1 of 2)
Lus10022202.g.BGIv1.0	31.231	-1.19497	0.382096	-3.1274	0.00176362	0.00970852	down	PF16021 - Programmed cell death protein 7 (PDCD7) (1 of 2)
Lus10015343.g.BGIv1.0	281.534	-1.19509	0.130527	-9.15588	5.39183e-20	2.73605e-18	down	K13024 - inositol hexakisphosphate/diphosphoinositol-pentakisphosphate kinase (HISPPD, VIP) (1 of 2)
Lus10002249.g.BGIv1.0	606.544	-1.19513	0.0851358	-14.0379	9.13892e-45	1.37063e-42	down	PF00004//PF13676 - ATPase family associated with various cellular activities (AAA) (AAA) // TIR domain (TIR_2) (1 of 2)
Lus10030611.g.BGIv1.0	276.938	-1.19516	0.12437	-9.60965	7.27942e-22	4.17052e-20	down	2.4.2.30 - NAD(+) ADP-ribosyltransferase / Poly(ADP-ribose)polymerase (1 of 14)
Lus10013834.g.BGIv1.0	427.559	-1.19597	0.099547	-12.0141	2.99631e-33	3.02726e-31	down	PF04674 - Phosphate-induced protein 1 conserved region (Phi_1) (1 of 13)
Lus10022077.g.BGIv1.0	162.664	-1.19717	0.171878	-6.96521	3.27924e-12	8.45663e-11	down	KOG0369 - Pyruvate carboxylase (1 of 1)
Lus10036333.g.BGIv1.0	100.824	-1.19903	0.2014	-5.95346	2.62527e-09	4.81467e-08	down	?
Lus10011221.g.BGIv1.0	35.6218	-1.20085	0.341517	-3.51623	0.000437724	0.00290196	down	?
Lus10031345.g.BGIv1.0	68.4654	-1.2011	0.267145	-4.49606	6.92227e-06	7.15223e-05	down	PTHR10891:SF573 - CALCIUM-BINDING PROTEIN CML24-RELATED (1 of 5)
Lus10036334.g.BGIv1.0	80.6946	-1.20231	0.238058	-5.0505	4.40663e-07	5.77932e-06	down	PTHR21493:SF117 - ALPHA/BETA-HYDROLASES SUPERFAMILY PROTEIN (1 of 2)
Lus10012215.g.BGIv1.0	336.916	-1.20249	0.10961	-10.9706	5.29262e-28	4.27272e-26	down	K13424 - WRKY transcription factor 33 (WRKY33) (1 of 3)
Lus10006983.g.BGIv1.0	609.646	-1.2032	0.0876906	-13.7209	7.60916e-43	1.08342e-40	down	5.3.1.5 - Xylose isomerase / D-xylose ketoisomerase (1 of 2)
Lus10011780.g.BGIv1.0	54.0368	-1.20618	0.314851	-3.83095	0.000127651	0.000981589	down	PTHR12058:SF1 - ACTIN-RELATED PROTEIN 2/3 COMPLEX SUBUNIT 2B (1 of 2)
Lus10042865.g.BGIv1.0	697.439	-1.20674	0.0857453	-14.0735	5.52539e-45	8.36117e-43	down	PF06200//PF06203 - tify domain (tify) // CCT motif (CCT) (1 of 1)
Lus10029089.g.BGIv1.0	30.868	-1.20694	0.379318	-3.18186	0.00146333	0.00828033	down	KOG4412 - 26S proteasome regulatory complex, subunit PSMD10 (1 of 48)
Lus10025855.g.BGIv1.0	1418.73	-1.20745	0.0573826	-21.0421	2.69951e-98	1.18305e-95	down	PF13369 - Transglutaminase-like superfamily (Transglut_core2) (1 of 3)
Lus10036517.g.BGIv1.0	78.4163	-1.20849	0.255551	-4.72893	2.25704e-06	2.59502e-05	down	PTHR23160:SF3 - SYNAPTONEMAL COMPLEX PROTEIN 1-RELATED (1 of 5)
Lus10036174.g.BGIv1.0	47.9253	-1.20884	0.292908	-4.12704	3.67457e-05	0.000324094	down	?
Lus10041843.g.BGIv1.0	1183.13	-1.2092	0.0700132	-17.2711	7.76847e-67	2.09718e-64	down	2.8.1.1 - Thiosulfate sulfurtransferase / Thiosulfate thiotransferase (1 of 12)
Lus10039263.g.BGIv1.0	48.9906	-1.20986	0.298448	-4.05385	5.03812e-05	0.000430082	down	PTHR11206:SF152 - MATE EFFLUX FAMILY PROTEIN (1 of 3)
Lus10017143.g.BGIv1.0	234.118	-1.21128	0.136208	-8.89284	5.95685e-19	2.74609e-17	down	PTHR11017:SF169 - DISEASE RESISTANCE PROTEIN-RELATED (1 of 61)
Lus10038627.g.BGIv1.0	28.8056	-1.2118	0.377605	-3.20916	0.00133121	0.00764885	down	PF04782 - Protein of unknown function (DUF632) (DUF632) (1 of 26)
Lus10041852.g.BGIv1.0	86.9217	-1.21182	0.217088	-5.58219	2.37515e-08	3.77173e-07	down	K08999 - hypothetical protein (K08999) (1 of 2)
Lus10035078.g.BGIv1.0	91.489	-1.21274	0.208742	-5.80975	6.25655e-09	1.08885e-07	down	K12581 - CCR4-NOT transcription complex subunit 7/8 (CNOT7_8, CAF1, POP2) (1 of 15)
Lus10021220.g.BGIv1.0	39.566	-1.21292	0.330844	-3.66613	0.000246252	0.00176166	down	K10886 - DNA-repair protein XRCC4 (XRCC4) (1 of 2)
Lus10035262.g.BGIv1.0	29.9034	-1.2135	0.375509	-3.23162	0.00123092	0.00715793	down	PTHR10165 - LIPID PHOSPHATE PHOSPHATASE (1 of 7)
Lus10023798.g.BGIv1.0	251.374	-1.21378	0.134851	-9.00089	2.23899e-19	1.07475e-17	down	KOG2011 - Sister chromatid cohesion complex Cohesin, subunit STAG/IRR1/SCC3 (1 of 2)
Lus10000430.g.BGIv1.0	386.556	-1.21408	0.109933	-11.0438	2.34815e-28	1.94689e-26	down	PTHR31917:SF4 - AGENET DOMAIN-CONTAINING PROTEIN-RELATED (1 of 2)
Lus10028201.g.BGIv1.0	91.2762	-1.215	0.232756	-5.22006	1.78868e-07	2.49624e-06	down	PTHR24093:SF264 - ATPASE 4, PLASMA MEMBRANE-TYPE (1 of 8)
Lus10005770.g.BGIv1.0	97.2954	-1.21614	0.205718	-5.91167	3.38662e-09	6.10804e-08	down	PF11152 - Protein of unknown function (DUF2930) (DUF2930) (1 of 4)
Lus10007817.g.BGIv1.0	118.782	-1.21684	0.18882	-6.44444	1.16031e-10	2.5608e-09	down	PTHR20854:SF30 - PAP-SPECIFIC PHOSPHATASE, MITOCHONDRIAL-RELATED (1 of 2)
Lus10041475.g.BGIv1.0	41.16	-1.21731	0.327165	-3.72079	0.000198597	0.00145183	down	PTHR22952:SF206 - TRANSCRIPTION FACTOR TGA2 (1 of 5)
Lus10042714.g.BGIv1.0	601.535	-1.21736	0.0904206	-13.4633	2.5715e-41	3.40295e-39	down	PTHR11017:SF169 - DISEASE RESISTANCE PROTEIN-RELATED (1 of 61)
Lus10036349.g.BGIv1.0	122.621	-1.21837	0.181456	-6.7144	1.88843e-11	4.53236e-10	down	PTHR13943//PTHR13943:SF48 - HRAS-LIKE SUPPRESSOR - RELATED // SUBFAMILY NOT NAMED (1 of 2)
Lus10034622.g.BGIv1.0	62.5746	-1.21899	0.255245	-4.77575	1.79035e-06	2.09339e-05	down	PF14817 - HAUS augmin-like complex subunit 5 (HAUS5) (1 of 5)
Lus10032137.g.BGIv1.0	121.793	-1.22098	0.184359	-6.62283	3.52378e-11	8.21769e-10	down	PTHR24031:SF145 - CRISPR-ASSOCIATED ENDONUCLEASE/HELICASE CAS3 (1 of 1)
Lus10041237.g.BGIv1.0	233.998	-1.22344	0.131018	-9.33791	9.82577e-21	5.27139e-19	down	PTHR12277:SF58 - ALPHA/BETA-HYDROLASES SUPERFAMILY PROTEIN (1 of 6)
Lus10033502.g.BGIv1.0	54.6219	-1.22377	0.281581	-4.34605	1.38609e-05	0.000134317	down	PTHR23421:SF73 - BETA-GALACTOSIDASE 6 (1 of 4)
Lus10030183.g.BGIv1.0	68.6666	-1.22431	0.252703	-4.84488	1.26688e-06	1.52628e-05	down	?
Lus10039647.g.BGIv1.0	23.9333	-1.22542	0.422016	-2.90372	0.00368757	0.0181342	down	K01762 - 1-aminocyclopropane-1-carboxylate synthase (ACS) (1 of 9)
Lus10026861.g.BGIv1.0	47.6235	-1.22605	0.294909	-4.15738	3.21916e-05	0.000287535	down	3.2.1.21 - Beta-glucosidase / Gentobiase (1 of 57)
Lus10021616.g.BGIv1.0	300.02	-1.22691	0.116905	-10.4949	9.11555e-26	6.38183e-24	down	PTHR33650:SF1 - CEMA-LIKE PROTON EXTRUSION PROTEIN-LIKE PROTEIN (1 of 2)
Lus10010858.g.BGIv1.0	37.2798	-1.22718	0.32809	-3.74037	0.000183748	0.00135532	down	?
Lus10004379.g.BGIv1.0	1008.39	-1.2272	0.069828	-17.5746	3.85359e-69	1.0659e-66	down	K08070 - 2-alkenal reductase (E1.3.1.74) (1 of 1)
Lus10041851.g.BGIv1.0	105.789	-1.22736	0.196098	-6.25893	3.87631e-10	7.91805e-09	down	PTHR11730//PTHR11730:SF55 - AMMONIUM TRANSPORTER // SUBFAMILY NOT NAMED (1 of 2)
Lus10038285.g.BGIv1.0	17.6652	-1.22931	0.488726	-2.51533	0.0118921	0.047195	down	PTHR31734:SF2 - AUXIN-RESPONSIVE PROTEIN IAA18-RELATED (1 of 5)
Lus10026743.g.BGIv1.0	109.139	-1.22949	0.210419	-5.84307	5.12475e-09	9.00701e-08	down	4.1.3.32 - 2,3-dimethylmalate lyase / (2R,3S)-2,3-dimethylmalate pyruvate-lyase (1 of 2)
Lus10020448.g.BGIv1.0	137.223	-1.22986	0.172051	-7.1482	8.79212e-13	2.4004e-11	down	?
Lus10010548.g.BGIv1.0	45.6834	-1.23045	0.307472	-4.00183	6.28548e-05	0.000523505	down	?
Lus10030915.g.BGIv1.0	265.218	-1.23051	0.12406	-9.91861	3.45542e-23	2.08966e-21	down	2.2.1.9 - 2-succinyl-5-enolpyruvyl-6-hydroxy-3-cyclohexene-1-carboxylic-acid synthase / SEPHCHC synthase (1 of 1)
Lus10021298.g.BGIv1.0	27.8851	-1.23059	0.397174	-3.09836	0.00194596	0.0105675	down	K06620 - transcription factor E2F3 (E2F3) (1 of 6)
Lus10042798.g.BGIv1.0	129.878	-1.23116	0.175521	-7.01429	2.31112e-12	6.02696e-11	down	PTHR22849//PTHR22849:SF12 - WDSAM1 PROTEIN // SUBFAMILY NOT NAMED (1 of 2)
Lus10039451.g.BGIv1.0	115.662	-1.23405	0.19521	-6.32167	2.58746e-10	5.45372e-09	down	PTHR31846:SF12 - RNA-BINDING PROTEIN YHBY (1 of 2)
Lus10021580.g.BGIv1.0	322.085	-1.23407	0.111876	-11.0307	2.71889e-28	2.23778e-26	down	PTHR11909:SF154 - PROTEIN KINASE FAMILY PROTEIN (1 of 7)
Lus10039020.g.BGIv1.0	42.4186	-1.23419	0.312289	-3.95209	7.74726e-05	0.000629955	down	K14488 - SAUR family protein (SAUR) (1 of 68)
Lus10003521.g.BGIv1.0	39.734	-1.23487	0.321493	-3.84104	0.000122515	0.000945842	down	PTHR23155 - LEUCINE-RICH REPEAT-CONTAINING PROTEIN (1 of 86)
Lus10033491.g.BGIv1.0	55.5218	-1.23665	0.296483	-4.17106	3.03185e-05	0.000272391	down	PTHR10857//PTHR10857:SF18 - COPINE // SUBFAMILY NOT NAMED (1 of 2)
Lus10031474.g.BGIv1.0	138.752	-1.23696	0.17447	-7.08986	1.34248e-12	3.60973e-11	down	PF13414 - TPR repeat (TPR_11) (1 of 113)
Lus10010277.g.BGIv1.0	21.1793	-1.23969	0.484959	-2.55627	0.0105801	0.0429996	down	PF04755 - PAP_fibrillin (PAP_fibrillin) (1 of 21)
Lus10037342.g.BGIv1.0	17.7008	-1.24004	0.474937	-2.61096	0.00902878	0.0377775	down	PTHR13780:SF51 - SNF1-RELATED PROTEIN KINASE REGULATORY SUBUNIT GAMMA-LIKE PV42A-RELATED (1 of 3)
Lus10020524.g.BGIv1.0	577.645	-1.24015	0.0863289	-14.3654	8.52973e-47	1.41791e-44	down	PTHR11017:SF169 - DISEASE RESISTANCE PROTEIN-RELATED (1 of 61)
Lus10014009.g.BGIv1.0	152.225	-1.24138	0.163407	-7.59685	3.03434e-14	9.64161e-13	down	PF01535 - PPR repeat (PPR) (1 of 695)
Lus10023787.g.BGIv1.0	670.067	-1.24172	0.0830055	-14.9595	1.34972e-50	2.44872e-48	down	?
Lus10042026.g.BGIv1.0	27.1579	-1.24224	0.397272	-3.12691	0.00176653	0.00972297	down	PTHR32440:SF11 - INACTIVE PURPLE ACID PHOSPHATASE 16-RELATED (1 of 3)
Lus10042505.g.BGIv1.0	43.649	-1.24264	0.32284	-3.84909	0.000118556	0.000918846	down	PF00069//PF11721 - Protein kinase domain (Pkinase) // Di-glucose binding within endoplasmic reticulum (Malectin) (1 of 1)
Lus10034204.g.BGIv1.0	30.7625	-1.24271	0.386902	-3.21194	0.00131841	0.00758952	down	K00430 - peroxidase (E1.11.1.7) (1 of 94)
Lus10022062.g.BGIv1.0	70.2364	-1.24417	0.306503	-4.05923	4.92343e-05	0.000421785	down	3.2.2.2 - Inosine nucleosidase / Inosinase (1 of 4)
Lus10020658.g.BGIv1.0	354.824	-1.24465	0.109389	-11.3782	5.37085e-30	4.75694e-28	down	PF04588 - Hypoxia induced protein conserved region (HIG_1_N) (1 of 7)
Lus10022496.g.BGIv1.0	194.254	-1.24494	0.148761	-8.36874	5.82381e-17	2.29585e-15	down	KOG2966 - Uncharacterized conserved protein (1 of 7)
Lus10023622.g.BGIv1.0	268.577	-1.24515	0.150775	-8.25833	1.47723e-16	5.63266e-15	down	K02552 - menaquinone-specific isochorismate synthase (menF) (1 of 1)
Lus10033494.g.BGIv1.0	56.0994	-1.2463	0.272767	-4.56912	4.89784e-06	5.2653e-05	down	PTHR31741:SF15 - O-FUCOSYLTRANSFERASE FAMILY PROTEIN (1 of 2)
Lus10024280.g.BGIv1.0	33.8333	-1.24761	0.375708	-3.32069	0.000897944	0.00544103	down	PTHR10366//PTHR10366:SF430 - NAD DEPENDENT EPIMERASE/DEHYDRATASE // SUBFAMILY NOT NAMED (1 of 2)
Lus10039190.g.BGIv1.0	1366.35	-1.2482	0.0580419	-21.5052	1.39244e-102	6.91e-100	down	PTHR22950:SF240 - TRANSMEMBRANE AMINO ACID TRANSPORTER-RELATED (1 of 3)
Lus10006235.g.BGIv1.0	20.0849	-1.24855	0.470404	-2.6542	0.00794965	0.0340908	down	PTHR10314//PTHR10314:SF70 - SER/THR DEHYDRATASE, TRP SYNTHASE // SUBFAMILY NOT NAMED (1 of 2)
Lus10015030.g.BGIv1.0	208.769	-1.25057	0.14355	-8.7118	2.99084e-18	1.30395e-16	down	K10706 - senataxin [EC:3.6.4.-] (SETX, ALS4) (1 of 4)
Lus10040565.g.BGIv1.0	296.064	-1.25064	0.12821	-9.75466	1.76185e-22	1.03218e-20	down	PTHR13832//PTHR13832:SF329 - PROTEIN PHOSPHATASE 2C // SUBFAMILY NOT NAMED (1 of 4)
Lus10037157.g.BGIv1.0	20.022	-1.25153	0.48066	-2.60378	0.00922021	0.0384024	down	PTHR24296:SF8 - CYTOCHROME P450 704B1 (1 of 2)
Lus10041033.g.BGIv1.0	17.3682	-1.25228	0.494625	-2.53177	0.0113487	0.0454446	down	PTHR10774:SF59 - SYNAPTOTAGMIN-4 (1 of 3)
Lus10009163.g.BGIv1.0	76.9511	-1.25346	0.235428	-5.32416	1.0142e-07	1.47138e-06	down	K15441 - tRNA-specific adenosine deaminase 2 [EC:3.5.4.-] (TAD2, ADAT2) (1 of 2)
Lus10040393.g.BGIv1.0	32.9318	-1.25357	0.362099	-3.46195	0.000536268	0.00347206	down	PTHR11260:SF186 - GLUTATHIONE S-TRANSFERASE F11-RELATED (1 of 4)
Lus10003615.g.BGIv1.0	20.7491	-1.25386	0.465308	-2.6947	0.00704529	0.0309079	down	PTHR11440:SF7 - PHOSPHOLIPID--STEROL O-ACYLTRANSFERASE (1 of 3)
Lus10026843.g.BGIv1.0	73.8684	-1.25499	0.238619	-5.25938	1.44543e-07	2.04597e-06	down	?
Lus10030169.g.BGIv1.0	19.3969	-1.2551	0.461011	-2.72249	0.00647917	0.0288176	down	PF00892 - EamA-like transporter family (EamA) (1 of 81)
Lus10032264.g.BGIv1.0	29.7277	-1.25645	0.396458	-3.16918	0.00152869	0.00859476	down	PTHR24115:SF477 - KINESIN-LIKE PROTEIN-RELATED (1 of 3)
Lus10008976.g.BGIv1.0	23.5616	-1.25905	0.419083	-3.00429	0.00266203	0.013784	down	PTHR12526:SF315 - GDP-MAN:MAN(3)GLCNAC(2)-PP-DOL ALPHA-1,2-MANNOSYLTRANSFERASE (1 of 5)
Lus10005315.g.BGIv1.0	95.6684	-1.25923	0.208935	-6.02689	1.67147e-09	3.17053e-08	down	PTHR32295:SF35 - PROTEIN IQ-DOMAIN 11 (1 of 2)
Lus10004613.g.BGIv1.0	34.5492	-1.25988	0.369714	-3.40773	0.000655056	0.00414091	down	PTHR14091 - WD REPEAT PROTEIN (1 of 4)
Lus10007489.g.BGIv1.0	24.0534	-1.26162	0.434196	-2.90564	0.00366499	0.0180442	down	K08740 - DNA mismatch repair protein MSH4 (MSH4) (1 of 2)
Lus10019338.g.BGIv1.0	79.0714	-1.26384	0.245709	-5.14365	2.69457e-07	3.66204e-06	down	K02320 - DNA polymerase alpha subunit A (POLA1) (1 of 2)
Lus10002054.g.BGIv1.0	96.3905	-1.26442	0.20796	-6.08012	1.20091e-09	2.31834e-08	down	PF01535//PF13041 - PPR repeat (PPR) // PPR repeat family (PPR_2) (1 of 308)
Lus10022476.g.BGIv1.0	1282.86	-1.26452	0.0593877	-21.2926	1.32851e-100	6.31415e-98	down	PTHR16166//PTHR16166:SF98 - VACUOLAR PROTEIN SORTING-ASSOCIATED PROTEIN VPS13 // SUBFAMILY NOT NAMED (1 of 1)
Lus10010061.g.BGIv1.0	752.479	-1.26488	0.076389	-16.5584	1.39322e-61	3.40683e-59	down	PTHR10217:SF476 - CYCLIC NUCLEOTIDE-GATED ION CHANNEL 4 (1 of 2)
Lus10014697.g.BGIv1.0	32.6193	-1.26651	0.359164	-3.52626	0.00042147	0.00280846	down	PTHR12461:SF16 - 2-OXOGLUTARATE (2OG) AND FE(II)-DEPENDENT OXYGENASE SUPERFAMILY PROTEIN (1 of 2)
Lus10029179.g.BGIv1.0	321.617	-1.26653	0.113821	-11.1274	9.22461e-29	7.78211e-27	down	PTHR13902//PTHR13902:SF23 - SERINE/THREONINE-PROTEIN KINASE WNK WITH NO LYSINE -RELATED // SUBFAMILY NOT NAMED (1 of 2)
Lus10031572.g.BGIv1.0	151.181	-1.2692	0.1628	-7.79605	6.38736e-15	2.17118e-13	down	?
Lus10018688.g.BGIv1.0	21.5317	-1.26925	0.483932	-2.62279	0.00872134	0.0367693	down	K18811 - cyclin D5, plant (CYCD5) (1 of 2)
Lus10039039.g.BGIv1.0	48.8055	-1.27008	0.292567	-4.34117	1.41729e-05	0.000136881	down	2.7.7.15 - Choline-phosphate cytidylyltransferase / Phosphorylcholine transferase (1 of 6)
Lus10020348.g.BGIv1.0	75.0419	-1.27024	0.244491	-5.19544	2.04236e-07	2.8297e-06	down	PTHR24096:SF190 - EBONY (1 of 2)
Lus10010895.g.BGIv1.0	182.146	-1.27136	0.161504	-7.87201	3.48997e-15	1.21411e-13	down	PTHR11802:SF29 - SERINE CARBOXYPEPTIDASE-LIKE 1-RELATED (1 of 7)
Lus10003676.g.BGIv1.0	76.426	-1.27178	0.244825	-5.19465	2.05107e-07	2.8401e-06	down	PTHR11564:SF15 - CELL DIVISION PROTEIN FTSY HOMOLOG, CHLOROPLASTIC (1 of 3)
Lus10041792.g.BGIv1.0	32.4448	-1.27297	0.362219	-3.51437	0.000440794	0.00291773	down	1.1.99.2//1.1.99.39 - L-2-hydroxyglutarate dehydrogenase / L-alpha-hydroxyglutarate dehydrogenase (1 of 1)
Lus10014418.g.BGIv1.0	199.863	-1.27461	0.146167	-8.72025	2.77582e-18	1.21491e-16	down	PTHR31096:SF23 - ACT DOMAIN-CONTAINING PROTEIN (1 of 2)
Lus10036681.g.BGIv1.0	22.8543	-1.27485	0.431361	-2.95541	0.00312256	0.0157955	down	6.3.3.2 - 5-formyltetrahydrofolate cyclo-ligase / Methenyl-THF synthetase (1 of 8)
Lus10004388.g.BGIv1.0	27.9011	-1.27739	0.410482	-3.11192	0.00185873	0.010174	down	PF00069//PF07714//PF08263//PF13855 - Protein kinase domain (Pkinase) // Protein tyrosine kinase (Pkinase_Tyr) // Leucine rich repeat N-terminal domain (LRRNT_2) // Leucine rich repeat (LRR_8) (1 of 1)
Lus10012986.g.BGIv1.0	62.0293	-1.27895	0.266318	-4.80234	1.56824e-06	1.85685e-05	down	PTHR13902//PTHR13902:SF23 - SERINE/THREONINE-PROTEIN KINASE WNK WITH NO LYSINE -RELATED // SUBFAMILY NOT NAMED (1 of 2)
Lus10042262.g.BGIv1.0	258.316	-1.27999	0.135424	-9.45175	3.3321e-21	1.8411e-19	down	PTHR11926:SF176 - UDP-GLYCOSYLTRANSFERASE 87A2 (1 of 8)
Lus10036312.g.BGIv1.0	626.086	-1.28054	0.0844363	-15.1658	5.95597e-52	1.12282e-49	down	K07466 - replication factor A1 (RFA1, RPA1, rpa) (1 of 14)
Lus10013174.g.BGIv1.0	259.14	-1.28225	0.144095	-8.89863	5.65393e-19	2.61885e-17	down	PTHR10578:SF67 - PEROXISOMAL (S)-2-HYDROXY-ACID OXIDASE GLO3-RELATED (1 of 4)
Lus10001424.g.BGIv1.0	134.579	-1.28238	0.190953	-6.71571	1.87156e-11	4.49507e-10	down	PTHR12741:SF16 - CALLOSE SYNTHASE 7-RELATED (1 of 5)
Lus10006085.g.BGIv1.0	23.1867	-1.2835	0.437695	-2.9324	0.00336356	0.0167805	down	PTHR23042:SF25 - TRANSCRIPTION FACTOR NAI1 (1 of 1)
Lus10043026.g.BGIv1.0	40.0759	-1.28365	0.322379	-3.98179	6.83996e-05	0.000564615	down	PTHR10209:SF146 - 2-OXOGLUTARATE (2OG) AND FE(II)-DEPENDENT OXYGENASE SUPERFAMILY PROTEIN-RELATED (1 of 4)
Lus10001934.g.BGIv1.0	285.452	-1.28369	0.125535	-10.2258	1.52016e-24	1.01379e-22	down	PTHR11850:SF122 - HOMEOBOX PROTEIN KNOTTED-1-LIKE 3-RELATED (1 of 4)
Lus10038491.g.BGIv1.0	22.2829	-1.28397	0.464352	-2.76508	0.0056909	0.0259058	down	PTHR12526:SF304 - STARCH SYNTHASE 4, CHLOROPLASTIC/AMYLOPLASTIC-RELATED (1 of 4)
Lus10022233.g.BGIv1.0	17.4275	-1.28411	0.509652	-2.51957	0.0117497	0.0467546	down	PTHR22835//PTHR22835:SF250 - ZINC FINGER FYVE DOMAIN CONTAINING PROTEIN // SUBFAMILY NOT NAMED (1 of 3)
Lus10031552.g.BGIv1.0	85.4361	-1.28423	0.243777	-5.26806	1.3787e-07	1.95726e-06	down	4.1.3.1 - Isocitrate lyase / Isocitritase (1 of 2)
Lus10010441.g.BGIv1.0	28.4134	-1.2846	0.405239	-3.16997	0.00152455	0.00857575	down	PTHR24115:SF535 - KINESIN-RELATED PROTEIN 4 (1 of 2)
Lus10008537.g.BGIv1.0	1992.21	-1.28553	0.0492346	-26.1102	2.78968e-150	2.54426e-147	down	1.11.1.12 - Phospholipid-hydroperoxide glutathione peroxidase / Peroxidation-inhibiting protein (1 of 7)
Lus10024544.g.BGIv1.0	210.568	-1.28618	0.13986	-9.19618	3.70887e-20	1.90207e-18	down	PTHR11926:SF308 - STEROL 3-BETA-GLUCOSYLTRANSFERASE UGT80A2 (1 of 9)
Lus10026979.g.BGIv1.0	48.594	-1.28929	0.286577	-4.49894	6.8293e-06	7.07784e-05	down	PTHR10168//PTHR10168:SF87 - GLUTAREDOXIN // SUBFAMILY NOT NAMED (1 of 1)
Lus10025446.g.BGIv1.0	730.827	-1.2902	0.082592	-15.6213	5.21023e-55	1.09205e-52	down	PF05564 - Dormancy/auxin associated protein (Auxin_repressed) (1 of 9)
Lus10041661.g.BGIv1.0	136.21	-1.29155	0.193833	-6.6632	2.67937e-11	6.33604e-10	down	K05674 - ATP-binding cassette, subfamily C (CFTR/MRP), member 10 (ABCC10) (1 of 1)
Lus10009314.g.BGIv1.0	128.779	-1.29177	0.176774	-7.30745	2.72261e-13	7.83244e-12	down	KOG2325 - Predicted transporter/transmembrane protein (1 of 4)
Lus10005480.g.BGIv1.0	105.432	-1.29305	0.201592	-6.41423	1.41541e-10	3.08945e-09	down	PF16719 - SAWADEE domain (SAWADEE) (1 of 9)
Lus10037550.g.BGIv1.0	654.53	-1.29444	0.0860624	-15.0407	3.97336e-51	7.40779e-49	down	PTHR22952:SF180 - TRANSCRIPTION FACTOR TGA1-RELATED (1 of 8)
Lus10042777.g.BGIv1.0	98.3564	-1.29528	0.239077	-5.41783	6.03273e-08	9.04776e-07	down	PTHR11017//PTHR11017:SF174 - LEUCINE-RICH REPEAT-CONTAINING PROTEIN // SUBFAMILY NOT NAMED (1 of 26)
Lus10005059.g.BGIv1.0	385.571	-1.29681	0.104905	-12.3618	4.20642e-35	4.59371e-33	down	PTHR24012:SF361 - SPLICING FACTOR, CC1-LIKE (1 of 6)
Lus10036144.g.BGIv1.0	284.368	-1.29768	0.128969	-10.062	8.13681e-24	5.16122e-22	down	K08282 - non-specific serine/threonine protein kinase (E2.7.11.1) (1 of 2)
Lus10002229.g.BGIv1.0	107.118	-1.29783	0.204953	-6.33233	2.41492e-10	5.10598e-09	down	?
Lus10043057.g.BGIv1.0	25.9776	-1.29802	0.424793	-3.05565	0.0022457	0.0119246	down	?
Lus10037595.g.BGIv1.0	59.0811	-1.29869	0.264308	-4.91353	8.94503e-07	1.10457e-05	down	PTHR19918 - CELL DIVISION CYCLE 20 CDC20 FIZZY -RELATED (1 of 21)
Lus10033014.g.BGIv1.0	317.826	-1.30091	0.119325	-10.9023	1.12405e-27	8.90404e-26	down	K00703 - starch synthase (E2.4.1.21, glgA) (1 of 4)
Lus10037615.g.BGIv1.0	38.1951	-1.30223	0.324676	-4.01088	6.04937e-05	0.000506793	down	PTHR22908:SF66 - MIDASIN (1 of 4)
Lus10004931.g.BGIv1.0	31.625	-1.30347	0.363181	-3.58903	0.000331911	0.00228345	down	?
Lus10002946.g.BGIv1.0	221.272	-1.30475	0.156493	-8.33744	7.59189e-17	2.96858e-15	down	PTHR23509:SF10 - PHOSPHOLIPASE DDHD1 (1 of 3)
Lus10020396.g.BGIv1.0	75.5379	-1.30679	0.250155	-5.22391	1.75183e-07	2.44684e-06	down	K11664 - vacuolar protein sorting-associated protein 72 (VPS72, TCFL1, YL1) (1 of 1)
Lus10006003.g.BGIv1.0	161.28	-1.30867	0.165642	-7.90056	2.77648e-15	9.72922e-14	down	PF03004 - Plant transposase (Ptta/En/Spm family) (Transposase_24) (1 of 34)
Lus10043102.g.BGIv1.0	194.892	-1.30914	0.149447	-8.7599	1.95416e-18	8.68815e-17	down	PTHR11214:SF131 - BETA-1,3-GALACTOSYLTRANSFERASE 16-RELATED (1 of 2)
Lus10027453.g.BGIv1.0	32.3573	-1.31072	0.35949	-3.64606	0.000266296	0.00188429	down	PTHR11361:SF34 - DNA MISMATCH REPAIR PROTEIN MSH3 (1 of 3)
Lus10033452.g.BGIv1.0	21.6818	-1.31211	0.437324	-3.00031	0.00269702	0.0139374	down	PTHR11736 - MELANOMA-ASSOCIATED ANTIGEN MAGE ANTIGEN (1 of 2)
Lus10030242.g.BGIv1.0	43.7901	-1.31435	0.309967	-4.2403	2.23225e-05	0.000206546	down	PTHR31985:SF15 - ETHYLENE-RESPONSIVE TRANSCRIPTION FACTOR ERF023 (1 of 2)
Lus10001361.g.BGIv1.0	114.981	-1.31667	0.203004	-6.48591	8.81954e-11	1.97227e-09	down	PTHR12221 - PESCADILLO - RELATED (1 of 5)
Lus10006709.g.BGIv1.0	49.6331	-1.31828	0.297701	-4.42819	9.50283e-06	9.524e-05	down	K05277 - leucoanthocyanidin dioxygenase (E1.14.11.19) (1 of 2)
Lus10003520.g.BGIv1.0	601.266	-1.31916	0.0932074	-14.153	1.78989e-45	2.82242e-43	down	PTHR23509:SF10 - PHOSPHOLIPASE DDHD1 (1 of 3)
Lus10015569.g.BGIv1.0	1244.06	-1.31976	0.0688416	-19.171	6.46456e-82	2.27236e-79	down	PTHR33231:SF1 - 30S RIBOSOMAL PROTEIN-RELATED (1 of 2)
Lus10010100.g.BGIv1.0	77.3195	-1.32096	0.242648	-5.44392	5.21199e-08	7.90821e-07	down	K12133 - MYB-related transcription factor LHY (LHY) (1 of 2)
Lus10018189.g.BGIv1.0	46.2061	-1.32103	0.325411	-4.05957	4.91641e-05	0.000421398	down	PTHR11132:SF127 - GDP-MANNOSE TRANSPORTER GONST5 (1 of 3)
Lus10042827.g.BGIv1.0	27.8861	-1.32159	0.414479	-3.18856	0.00142984	0.00812427	down	?
Lus10033472.g.BGIv1.0	206.38	-1.32356	0.143577	-9.2185	3.01276e-20	1.55452e-18	down	PTHR16079 - UBIQUITIN LIGASE PROTEIN CHFR (1 of 2)
Lus10014134.g.BGIv1.0	15.4665	-1.32394	0.515027	-2.57062	0.0101515	0.0415682	down	K05277 - leucoanthocyanidin dioxygenase (E1.14.11.19) (1 of 2)
Lus10002051.g.BGIv1.0	149.112	-1.32498	0.170718	-7.76122	8.41174e-15	2.82723e-13	down	PTHR12549:SF16 - HISTONE H3MK9 DEMETHYLASE (1 of 9)
Lus10041031.g.BGIv1.0	49.7946	-1.32665	0.286642	-4.62825	3.68761e-06	4.06927e-05	down	K13082 - bifunctional dihydroflavonol 4-reductase/flavanone 4-reductase (DFR) (1 of 1)
Lus10000293.g.BGIv1.0	32.9915	-1.32875	0.355366	-3.7391	0.000184682	0.00136161	down	?
Lus10000971.g.BGIv1.0	141.61	-1.3314	0.181332	-7.34234	2.0989e-13	6.11108e-12	down	2.7.7.10 - UTP--hexose-1-phosphate uridylyltransferase / Galactose-1-phosphate uridylyltransferase (1 of 2)
Lus10005248.g.BGIv1.0	20.9195	-1.3315	0.459727	-2.89629	0.00377602	0.018483	down	PTHR12565:SF172 - BHLH TRANSCRIPTION FACTOR PRE1-RELATED (1 of 4)
Lus10018410.g.BGIv1.0	411.531	-1.33213	0.107372	-12.4068	2.40159e-35	2.64843e-33	down	PF04749 - PLAC8 family (PLAC8) (1 of 30)
Lus10031068.g.BGIv1.0	76.9522	-1.33434	0.232617	-5.73621	9.68175e-09	1.63847e-07	down	PTHR11926:SF149 - UDP-GLYCOSYLTRANSFERASE 82A1 (1 of 2)
Lus10011646.g.BGIv1.0	79.6563	-1.33503	0.229545	-5.81597	6.02849e-09	1.05024e-07	down	PF13041 - PPR repeat family (PPR_2) (1 of 719)
Lus10004486.g.BGIv1.0	49.3637	-1.3354	0.292985	-4.55791	5.16657e-06	5.52427e-05	down	PF09353 - Domain of unknown function (DUF1995) (DUF1995) (1 of 10)
Lus10008307.g.BGIv1.0	1167.83	-1.33592	0.0679771	-19.6525	5.5055e-86	2.16027e-83	down	K13024 - inositol hexakisphosphate/diphosphoinositol-pentakisphosphate kinase (HISPPD, VIP) (1 of 2)
Lus10024243.g.BGIv1.0	32.1586	-1.33679	0.369737	-3.61551	0.000299753	0.00208862	down	PTHR19229//PTHR19229:SF127 - ATP-BINDING CASSETTE TRANSPORTER SUBFAMILY A ABCA // SUBFAMILY NOT NAMED (1 of 2)
Lus10011733.g.BGIv1.0	181.868	-1.33705	0.161969	-8.25495	1.51962e-16	5.78775e-15	down	PF01471 - Putative peptidoglycan binding domain (PG_binding_1) (1 of 15)
Lus10024176.g.BGIv1.0	127.974	-1.33839	0.181329	-7.38097	1.57143e-13	4.64342e-12	down	PF13839//PF14416 - GDSL/SGNH-like Acyl-Esterase family found in Pmr5 and Cas1p (PC-Esterase) // PMR5 N terminal Domain (PMR5N) (1 of 74)
Lus10015759.g.BGIv1.0	52.8165	-1.33861	0.279631	-4.78707	1.69237e-06	1.98709e-05	down	PTHR21240 - 2-AMINO-3-CARBOXYLMUCONATE-6-SEMIALDEHYDE DECARBOXYLASE (1 of 2)
Lus10037318.g.BGIv1.0	52.5845	-1.34076	0.28817	-4.65267	3.27666e-06	3.65644e-05	down	PTHR11430 - LIPOCALIN (1 of 2)
Lus10040294.g.BGIv1.0	343.634	-1.34133	0.112973	-11.873	1.63565e-32	1.59064e-30	down	PTHR32227:SF62 - GLUCOSIDASE-LIKE PROTEIN (1 of 9)
Lus10001878.g.BGIv1.0	42.4287	-1.3441	0.319294	-4.20959	2.55835e-05	0.000233791	down	2.1.2.11 - 3-methyl-2-oxobutanoate hydroxymethyltransferase / Ketopantoate hydroxymethyltransferase (1 of 2)
Lus10024374.g.BGIv1.0	337.537	-1.34432	0.113369	-11.8579	1.95818e-32	1.89338e-30	down	PTHR22950:SF313 - AMINO ACID TRANSPORTER FAMILY PROTEIN-RELATED (1 of 2)
Lus10024061.g.BGIv1.0	1386.7	-1.34511	0.0577299	-23.3002	4.41661e-120	2.75997e-117	down	PTHR19241:SF219 - ABC TRANSPORTER G FAMILY MEMBER 38 (1 of 17)
Lus10003381.g.BGIv1.0	334.878	-1.34513	0.117933	-11.4059	3.90829e-30	3.48902e-28	down	?
Lus10039959.g.BGIv1.0	200.177	-1.34545	0.159127	-8.4552	2.78606e-17	1.12459e-15	down	PTHR23336:SF2 - MICRORCHIDIA ADENOSINE TRIPHOSPHATASE (ATPASE) FAMILY PROTEIN (1 of 3)
Lus10003298.g.BGIv1.0	605.918	-1.34625	0.0921613	-14.6075	2.51444e-48	4.32907e-46	down	PTHR23273//PTHR23273:SF10 - REPLICATION FACTOR A 1, RFA1 // SUBFAMILY NOT NAMED (1 of 1)
Lus10004012.g.BGIv1.0	21.8288	-1.34735	0.455496	-2.95799	0.00309653	0.0156825	down	PTHR13793:SF92 - HISTONE-LYSINE N-METHYLTRANSFERASE ATX3 (1 of 4)
Lus10009876.g.BGIv1.0	43.7069	-1.34808	0.306943	-4.39196	1.12332e-05	0.000110773	down	PTHR11926//PTHR11926:SF220 - GLUCOSYL/GLUCURONOSYL TRANSFERASES // SUBFAMILY NOT NAMED (1 of 6)
Lus10037967.g.BGIv1.0	19.0562	-1.3485	0.53	-2.54435	0.0109482	0.0442612	down	?
Lus10034637.g.BGIv1.0	74.9719	-1.34889	0.260939	-5.16935	2.34908e-07	3.22629e-06	down	PTHR27002:SF84 - ATP BINDING / PROTEIN KINASE-RELATED (1 of 21)
Lus10025733.g.BGIv1.0	213.717	-1.3495	0.142579	-9.4649	2.9384e-21	1.62818e-19	down	4.1.99.12 - 3,4-dihydroxy-2-butanone-4-phosphate synthase / L-3,4-dihydroxybutan-2-one-4-phosphate synthase (1 of 4)
Lus10004919.g.BGIv1.0	16.2644	-1.34989	0.501416	-2.69215	0.00709928	0.0310882	down	PTHR31561:SF24 - 3-KETOACYL-COA SYNTHASE 12-RELATED (1 of 17)
Lus10002573.g.BGIv1.0	282.38	-1.3504	0.122284	-11.0431	2.36599e-28	1.95687e-26	down	?
Lus10019082.g.BGIv1.0	28.7204	-1.35095	0.396127	-3.41039	0.00064871	0.00410631	down	5.1.3.1 - Ribulose-phosphate 3-epimerase / Xylulose phosphate 3-epimerase (1 of 7)
Lus10017392.g.BGIv1.0	22.5673	-1.352	0.442099	-3.05815	0.0022271	0.0118408	down	PTHR11802:SF31 - SERINE CARBOXYPEPTIDASE-LIKE 34 (1 of 4)
Lus10002052.g.BGIv1.0	37.7629	-1.3533	0.335224	-4.03701	5.41363e-05	0.000458657	down	PTHR12549:SF16 - HISTONE H3MK9 DEMETHYLASE (1 of 9)
Lus10015548.g.BGIv1.0	152.062	-1.35334	0.17054	-7.93561	2.09459e-15	7.41678e-14	down	PF14476 - Petal formation-expressed (Chloroplast_duf) (1 of 4)
Lus10006088.g.BGIv1.0	185.486	-1.35352	0.165115	-8.19742	2.45605e-16	9.28099e-15	down	PTHR10536 - DNA PRIMASE SMALL SUBUNIT (1 of 2)
Lus10013024.g.BGIv1.0	132.763	-1.35479	0.175262	-7.73008	1.07482e-14	3.56985e-13	down	PF08327//PF09439 - Activator of Hsp90 ATPase homolog 1-like protein (AHSA1) // Signal recognition particle receptor beta subunit (SRPRB) (1 of 1)
Lus10006068.g.BGIv1.0	680.603	-1.35493	0.0812678	-16.6724	2.08221e-62	5.12877e-60	down	KOG1397 - Ca2+/H+ antiporter VCX1 and related proteins (1 of 13)
Lus10004110.g.BGIv1.0	28.7623	-1.35494	0.395016	-3.43008	0.000603396	0.00385636	down	PTHR27001:SF20 - PROTEIN KINASE FAMILY PROTEIN (1 of 2)
Lus10020449.g.BGIv1.0	132.621	-1.35513	0.185945	-7.2878	3.15059e-13	9.00225e-12	down	?
Lus10002093.g.BGIv1.0	540.331	-1.35572	0.0907788	-14.9343	1.97053e-50	3.55591e-48	down	K13091 - RNA-binding protein 39 (RBM39, RNPC2) (1 of 5)
Lus10038498.g.BGIv1.0	54.8993	-1.35643	0.273056	-4.96758	6.7792e-07	8.60015e-06	down	PTHR10209:SF171 - GIBBERELLIN 2-BETA-DIOXYGENASE 2-RELATED (1 of 2)
Lus10000428.g.BGIv1.0	461.754	-1.35819	0.0949939	-14.2976	2.26415e-46	3.69101e-44	down	PF01535//PF13041 - PPR repeat (PPR) // PPR repeat family (PPR_2) (1 of 308)
Lus10037968.g.BGIv1.0	112.997	-1.3587	0.190768	-7.12228	1.0616e-12	2.87509e-11	down	K17964 - leucine-rich PPR motif-containing protein, mitochondrial (LRPPRC) (1 of 8)
Lus10002414.g.BGIv1.0	90.212	-1.35944	0.241347	-5.63273	1.77381e-08	2.87499e-07	down	PTHR24096:SF111 - LONG CHAIN ACYL-COA SYNTHETASE 1 (1 of 2)
Lus10030641.g.BGIv1.0	55.1511	-1.35954	0.297879	-4.56409	5.01667e-06	5.38275e-05	down	?
Lus10013176.g.BGIv1.0	34.6799	-1.36067	0.339876	-4.00342	6.24335e-05	0.000520716	down	PF01535//PF13041 - PPR repeat (PPR) // PPR repeat family (PPR_2) (1 of 308)
Lus10031516.g.BGIv1.0	59.9327	-1.36082	0.266819	-5.10016	3.39369e-07	4.54625e-06	down	PTHR14614//PTHR14614:SF31 - HEPATOCELLULAR CARCINOMA-ASSOCIATED ANTIGEN // SUBFAMILY NOT NAMED (1 of 2)
Lus10035746.g.BGIv1.0	53.4528	-1.36084	0.299432	-4.54474	5.50029e-06	5.83121e-05	down	?
Lus10041912.g.BGIv1.0	41.5184	-1.36257	0.315436	-4.31963	1.56294e-05	0.000149409	down	K00475 - naringenin 3-dioxygenase (E1.14.11.9) (1 of 2)
Lus10017740.g.BGIv1.0	33.9792	-1.36317	0.346563	-3.93339	8.37576e-05	0.000678771	down	PTHR32227:SF132 - BETA-1,3-GLUCANASE-LIKE PROTEIN (1 of 2)
Lus10030928.g.BGIv1.0	42.4568	-1.36403	0.317983	-4.28963	1.78971e-05	0.000169028	down	PTHR11566//PTHR11566:SF77 - DYNAMIN // SUBFAMILY NOT NAMED (1 of 3)
Lus10003489.g.BGIv1.0	37.4118	-1.36505	0.354138	-3.85458	0.000115929	0.000900975	down	?
Lus10001362.g.BGIv1.0	84.3235	-1.36757	0.222898	-6.13543	8.4929e-10	1.66915e-08	down	PTHR12221 - PESCADILLO - RELATED (1 of 5)
Lus10013401.g.BGIv1.0	424.686	-1.36804	0.102851	-13.3013	2.27618e-40	2.93167e-38	down	K00167 - 2-oxoisovalerate dehydrogenase E1 component beta subunit (BCKDHB, bkdA2) (1 of 2)
Lus10005521.g.BGIv1.0	152.389	-1.36908	0.163587	-8.36913	5.80435e-17	2.29085e-15	down	PTHR13140:SF390 - MYOSIN-11-RELATED (1 of 5)
Lus10000790.g.BGIv1.0	21.6121	-1.3737	0.456964	-3.00614	0.00264584	0.013717	down	K10870 - RAD51-like protein 2 (RAD51L2, RAD51C) (1 of 1)
Lus10024000.g.BGIv1.0	44.0733	-1.37422	0.33766	-4.06984	4.70445e-05	0.000405393	down	?
Lus10022652.g.BGIv1.0	44.9508	-1.37501	0.31488	-4.36676	1.261e-05	0.000123198	down	?
Lus10030740.g.BGIv1.0	27.2423	-1.37652	0.390835	-3.522	0.000428305	0.00284679	down	PF01697 - Glycosyltransferase family 92 (Glyco_transf_92) (1 of 6)
Lus10029702.g.BGIv1.0	383.037	-1.37696	0.105459	-13.0568	5.81495e-39	7.21417e-37	down	PTHR22950:SF205 - AMINO ACID PERMEASE 3-RELATED (1 of 14)
Lus10000768.g.BGIv1.0	42.7302	-1.37755	0.349219	-3.94465	7.99161e-05	0.000649042	down	?
Lus10009350.g.BGIv1.0	633.006	-1.37803	0.0838564	-16.4332	1.10572e-60	2.59115e-58	down	K13168 - splicing factor, arginine/serine-rich 16 (SFRS16) (1 of 1)
Lus10015659.g.BGIv1.0	28.2886	-1.37918	0.387801	-3.5564	0.000375972	0.00254453	down	PTHR15180:SF1 - GENERAL TRANSCRIPTION FACTOR 3C POLYPEPTIDE 1 (1 of 6)
Lus10043058.g.BGIv1.0	39.7481	-1.37935	0.330126	-4.17826	2.93749e-05	0.000264617	down	?
Lus10035739.g.BGIv1.0	34.2769	-1.38087	0.362123	-3.81325	0.000137149	0.0010459	down	PTHR10794:SF40 - ALPHA/BETA-HYDROLASES SUPERFAMILY PROTEIN (1 of 7)
Lus10020733.g.BGIv1.0	288.208	-1.38116	0.119767	-11.5321	9.09286e-31	8.29294e-29	down	PTHR14255//PTHR14255:SF5 - ATP-DEPENDENT PROTEASE CEREBLON // SUBFAMILY NOT NAMED (1 of 2)
Lus10023422.g.BGIv1.0	53.4578	-1.38117	0.284272	-4.85864	1.18195e-06	1.43162e-05	down	PTHR11774:SF4 - GERANYLGERANYL TRANSFERASE TYPE-1 SUBUNIT BETA (1 of 2)
Lus10022733.g.BGIv1.0	153.059	-1.38339	0.180145	-7.6793	1.59954e-14	5.23536e-13	down	?
Lus10008619.g.BGIv1.0	25.7785	-1.38446	0.470845	-2.94037	0.00327823	0.0164399	down	PTHR10108:SF776 - METHYLTRANSFERASE PMT2-RELATED (1 of 6)
Lus10005141.g.BGIv1.0	158.423	-1.38472	0.181465	-7.63079	2.33311e-14	7.48393e-13	down	PTHR14950:SF3 - ENDORIBONUCLEASE DICER HOMOLOG 1 (1 of 4)
Lus10014150.g.BGIv1.0	2728.03	-1.38504	0.0480532	-28.8231	1.10254e-182	1.37797e-179	down	PTHR19241:SF246 - ABC TRANSPORTER G FAMILY MEMBER 29 (1 of 3)
Lus10011018.g.BGIv1.0	56.2978	-1.38563	0.282427	-4.90614	9.28858e-07	1.14395e-05	down	PTHR10795//PTHR10795:SF384 - PROPROTEIN CONVERTASE SUBTILISIN/KEXIN // SUBFAMILY NOT NAMED (1 of 4)
Lus10011199.g.BGIv1.0	15.2671	-1.38566	0.525789	-2.63538	0.0084042	0.0357099	down	?
Lus10029752.g.BGIv1.0	24.988	-1.38567	0.466677	-2.96922	0.00298555	0.0152163	down	PTHR10438//PTHR10438:SF290 - THIOREDOXIN // SUBFAMILY NOT NAMED (1 of 4)
Lus10013090.g.BGIv1.0	109.528	-1.38569	0.209155	-6.62517	3.4684e-11	8.11659e-10	down	PTHR11822:SF5 - ISOCITRATE DEHYDROGENASE [NADP], CHLOROPLASTIC/MITOCHONDRIAL (1 of 2)
Lus10042778.g.BGIv1.0	260.628	-1.38585	0.127169	-10.8976	1.18274e-27	9.34696e-26	down	KOG0531//KOG0617 - Protein phosphatase 1, regulatory subunit, and related proteins // Ras suppressor protein (contains leucine-rich repeats) (1 of 2)
Lus10001121.g.BGIv1.0	73.1027	-1.3873	0.237086	-5.85146	4.87286e-09	8.59115e-08	down	K07007 - uncharacterized protein (K07007) (1 of 2)
Lus10000769.g.BGIv1.0	57.3722	-1.38785	0.276907	-5.01195	5.38802e-07	6.96357e-06	down	PTHR23076//PTHR23076:SF60 - METALLOPROTEASE M41 FTSH // SUBFAMILY NOT NAMED (1 of 3)
Lus10008754.g.BGIv1.0	192.038	-1.39006	0.150582	-9.23129	2.67394e-20	1.39247e-18	down	PTHR30304 - D-TAGATOSE-1,6-BISPHOSPHATE ALDOLASE (1 of 1)
Lus10029765.g.BGIv1.0	91.2976	-1.39235	0.215727	-6.45424	1.08762e-10	2.4112e-09	down	PTHR10219:SF34 - GENOMIC DNA, CHROMOSOME 3, P1 CLONE: MXL8 (1 of 3)
Lus10023550.g.BGIv1.0	39.4491	-1.39253	0.323485	-4.30477	1.67161e-05	0.000158944	down	1.5.1.3 - Dihydrofolate reductase / Tetrahydrofolate dehydrogenase (1 of 3)
Lus10034362.g.BGIv1.0	16.0869	-1.39255	0.498384	-2.79412	0.00520408	0.0241357	down	K13963 - serpin B (SERPINB) (1 of 5)
Lus10003335.g.BGIv1.0	107.295	-1.39347	0.215163	-6.47633	9.39821e-11	2.09889e-09	down	PTHR31223:SF14 - CYTOKININ RIBOSIDE 5'-MONOPHOSPHATE PHOSPHORIBOHYDROLASE LOG5 (1 of 4)
Lus10007234.g.BGIv1.0	404.932	-1.39382	0.104395	-13.3515	1.16156e-40	1.50179e-38	down	2.7.1.17 - Xylulokinase / Xylulose kinase (1 of 2)
Lus10006145.g.BGIv1.0	34.3671	-1.39391	0.355882	-3.91679	8.97358e-05	0.000720093	down	PTHR14217:SF1 - INOSITOL-TETRAKISPHOSPHATE 1-KINASE (1 of 2)
Lus10027448.g.BGIv1.0	27.823	-1.39472	0.41036	-3.39878	0.000676881	0.00425893	down	?
Lus10002935.g.BGIv1.0	93.523	-1.39719	0.229221	-6.09538	1.09175e-09	2.11974e-08	down	PTHR23505:SF21 - SPHINGOLIPID TRANSPORTER SPINSTER HOMOLOG 1-RELATED (1 of 1)
Lus10019585.g.BGIv1.0	115.377	-1.39742	0.195413	-7.15111	8.60788e-13	2.35773e-11	down	PTHR12136//PTHR12136:SF49 - STEROIDOGENIC ACUTE REGULATORY PROTEIN STAR // SUBFAMILY NOT NAMED (1 of 5)
Lus10031402.g.BGIv1.0	18.6741	-1.3981	0.506252	-2.76168	0.00575051	0.0261278	down	PTHR13620:SF15 - EXONUCLEASE MUT-7 HOMOLOG-RELATED (1 of 4)
Lus10009777.g.BGIv1.0	147.633	-1.40248	0.182148	-7.69969	1.36392e-14	4.50348e-13	down	KOG0753//KOG0759 - Mitochondrial fatty acid anion carrier protein/Uncoupling protein // Mitochondrial oxoglutarate/malate carrier proteins (1 of 1)
Lus10016277.g.BGIv1.0	405.005	-1.40286	0.102381	-13.7024	9.82567e-43	1.39314e-40	down	PTHR14894 - CDK5 REGULATORY SUBUNIT-ASSOCIATED PROTEIN 3 (1 of 2)
Lus10000429.g.BGIv1.0	368.021	-1.40315	0.114453	-12.2596	1.49291e-34	1.6044e-32	down	?
Lus10014831.g.BGIv1.0	377.364	-1.40316	0.116198	-12.0756	1.42081e-33	1.46622e-31	down	PTHR11926//PTHR11926:SF220 - GLUCOSYL/GLUCURONOSYL TRANSFERASES // SUBFAMILY NOT NAMED (1 of 6)
Lus10019071.g.BGIv1.0	38.4333	-1.40322	0.330822	-4.24163	2.21907e-05	0.000205665	down	PF00406//PF09353 - Adenylate kinase (ADK) // Domain of unknown function (DUF1995) (DUF1995) (1 of 2)
Lus10043039.g.BGIv1.0	15.9171	-1.40334	0.561736	-2.49822	0.012482	0.0491544	down	PTHR33172:SF2 - EMB (1 of 6)
Lus10024358.g.BGIv1.0	80.0781	-1.40334	0.241562	-5.80943	6.26848e-09	1.09036e-07	down	1.1.1.206//1.1.1.236 - Tropinone reductase I / Tropinone reductase // Tropinone reductase II / Tropinone reductase (1 of 20)
Lus10022282.g.BGIv1.0	247.203	-1.40409	0.133116	-10.5479	5.19694e-26	3.68426e-24	down	K16190 - glucuronokinase (GLCAK) (1 of 2)
Lus10004036.g.BGIv1.0	59.4045	-1.40562	0.289916	-4.84839	1.2447e-06	1.50062e-05	down	PTHR19959:SF159 - TETRATRICOPEPTIDE REPEAT DOMAIN-CONTAINING PROTEIN (1 of 2)
Lus10016858.g.BGIv1.0	5336.78	-1.40597	0.034847	-40.347	0	0	down	PTHR30620:SF50 - BETA-D-XYLOSIDASE 1 (1 of 1)
Lus10037644.g.BGIv1.0	913.962	-1.40726	0.0721369	-19.5083	9.34169e-85	3.58222e-82	down	PTHR23421:SF74 - BETA-GALACTOSIDASE 1 (1 of 8)
Lus10027321.g.BGIv1.0	422.787	-1.40894	0.116224	-12.1227	8.01242e-34	8.31935e-32	down	K14445 - solute carrier family 13 (sodium-dependent dicarboxylate transporter), member 2/3/5 (SLC13A2_3_5) (1 of 1)
Lus10036282.g.BGIv1.0	415.161	-1.41091	0.102778	-13.7277	6.92793e-43	9.94822e-41	down	K09287 - RAV-like factor (RAV) (1 of 2)
Lus10022663.g.BGIv1.0	29.4377	-1.41263	0.379365	-3.72367	0.000196347	0.00143725	down	PTHR19241:SF219 - ABC TRANSPORTER G FAMILY MEMBER 38 (1 of 17)
Lus10040457.g.BGIv1.0	430.077	-1.4144	0.104958	-13.4758	2.17034e-41	2.89479e-39	down	K00121 - S-(hydroxymethyl)glutathione dehydrogenase / alcohol dehydrogenase (frmA, ADH5, adhC) (1 of 7)
Lus10003382.g.BGIv1.0	22.4559	-1.41572	0.430634	-3.28753	0.00101069	0.00604499	down	PF13041 - PPR repeat family (PPR_2) (1 of 719)
Lus10022401.g.BGIv1.0	43.975	-1.42052	0.311767	-4.55636	5.20488e-06	5.55995e-05	down	PF01535//PF13041 - PPR repeat (PPR) // PPR repeat family (PPR_2) (1 of 308)
Lus10014608.g.BGIv1.0	46.5291	-1.42118	0.313562	-4.53237	5.8325e-06	6.1333e-05	down	2.7.7.22 - Mannose-1-phosphate guanylyltransferase (GDP) / GDP-mannose pyrophosphorylase (1 of 7)
Lus10020536.g.BGIv1.0	437.118	-1.42171	0.101747	-13.973	2.27758e-44	3.40075e-42	down	PTHR11017:SF169 - DISEASE RESISTANCE PROTEIN-RELATED (1 of 61)
Lus10005317.g.BGIv1.0	73.9192	-1.42607	0.254281	-5.60825	2.0438e-08	3.27329e-07	down	K00279 - cytokinin dehydrogenase (CKX) (1 of 6)
Lus10012944.g.BGIv1.0	35.9251	-1.42704	0.348043	-4.10017	4.12841e-05	0.000360262	down	PTHR11206:SF76 - MATE EFFLUX FAMILY PROTEIN (1 of 1)
Lus10013536.g.BGIv1.0	116.272	-1.42721	0.194623	-7.33321	2.24696e-13	6.51407e-12	down	PTHR19376:SF32 - DNA-DIRECTED RNA POLYMERASE III SUBUNIT RPC1 (1 of 3)
Lus10042264.g.BGIv1.0	18.73	-1.42856	0.478615	-2.98478	0.00283785	0.0145692	down	PTHR11926:SF176 - UDP-GLYCOSYLTRANSFERASE 87A2 (1 of 8)
Lus10006920.g.BGIv1.0	13.8913	-1.4288	0.549171	-2.60175	0.00927493	0.0385779	down	?
Lus10042623.g.BGIv1.0	1158.75	-1.42927	0.0620752	-23.0247	2.6348e-117	1.55985e-114	down	K01968 - 3-methylcrotonyl-CoA carboxylase alpha subunit (E6.4.1.4A) (1 of 1)
Lus10021546.g.BGIv1.0	271.009	-1.42942	0.132206	-10.812	3.01955e-27	2.31579e-25	down	?
Lus10012742.g.BGIv1.0	320.76	-1.43201	0.115696	-12.3773	3.4679e-35	3.81186e-33	down	PTHR31907:SF4 - MLP-LIKE PROTEIN 165-RELATED (1 of 6)
Lus10018146.g.BGIv1.0	389.644	-1.43426	0.104528	-13.7213	7.56939e-43	1.08233e-40	down	PTHR13683:SF316 - ASPARTYL PROTEASE FAMILY PROTEIN-RELATED (1 of 3)
Lus10007044.g.BGIv1.0	12.7953	-1.43649	0.571394	-2.51401	0.0119366	0.0473329	down	PTHR10795//PTHR10795:SF370 - PROPROTEIN CONVERTASE SUBTILISIN/KEXIN // SUBFAMILY NOT NAMED (1 of 33)
Lus10009341.g.BGIv1.0	26.8039	-1.43683	0.39548	-3.63312	0.00028001	0.00196812	down	PTHR12606 - SENTRIN/SUMO-SPECIFIC PROTEASE (1 of 11)
Lus10006816.g.BGIv1.0	193.831	-1.439	0.156541	-9.19253	3.83712e-20	1.96187e-18	down	?
Lus10027276.g.BGIv1.0	715.18	-1.44102	0.0795643	-18.1113	2.59368e-73	7.54515e-71	down	K01209 - alpha-N-arabinofuranosidase (E3.2.1.55, abfA) (1 of 2)
Lus10022370.g.BGIv1.0	147.04	-1.44132	0.17335	-8.31449	9.21463e-17	3.57411e-15	down	PTHR34049:SF1 - F-BOX PROTEIN SKIP27 (1 of 3)
Lus10010938.g.BGIv1.0	77.8864	-1.44145	0.242441	-5.94559	2.75459e-09	5.03814e-08	down	K08235 - xyloglucan:xyloglucosyl transferase (E2.4.1.207) (1 of 48)
Lus10030399.g.BGIv1.0	215.501	-1.44199	0.152689	-9.44395	3.58975e-21	1.97935e-19	down	K08518 - syntaxin-binding protein 5 (STXBP5) (1 of 2)
Lus10023895.g.BGIv1.0	732.917	-1.44357	0.085565	-16.871	7.3513e-64	1.90823e-61	down	PTHR23120 - MAESTRO-RELATED HEAT DOMAIN-CONTAINING (1 of 2)
Lus10000803.g.BGIv1.0	89.3462	-1.44368	0.219497	-6.5772	4.79385e-11	1.09748e-09	down	PTHR23421:SF51 - BETA-GALACTOSIDASE 5 (1 of 2)
Lus10026351.g.BGIv1.0	55.4813	-1.44696	0.284981	-5.07739	3.82662e-07	5.07384e-06	down	PTHR10366//PTHR10366:SF375 - NAD DEPENDENT EPIMERASE/DEHYDRATASE // SUBFAMILY NOT NAMED (1 of 8)
Lus10021029.g.BGIv1.0	62.1667	-1.44795	0.270107	-5.36067	8.2914e-08	1.22074e-06	down	PTHR27000:SF136 - POLYGALACTURONASE INHIBITOR 1-RELATED (1 of 3)
Lus10021462.g.BGIv1.0	416.013	-1.44859	0.100813	-14.369	8.09702e-47	1.35264e-44	down	PTHR31223:SF23 - CYTOKININ RIBOSIDE 5'-MONOPHOSPHATE PHOSPHORIBOHYDROLASE LOG1 (1 of 2)
Lus10015272.g.BGIv1.0	29.4877	-1.45259	0.371076	-3.91453	9.05793e-05	0.000725344	down	PTHR12383//PTHR12383:SF23 - PROTEASE FAMILY S26 MITOCHONDRIAL INNER MEMBRANE PROTEASE-RELATED // SUBFAMILY NOT NAMED (1 of 5)
Lus10026061.g.BGIv1.0	1541.6	-1.45342	0.0628404	-23.1288	2.37804e-118	1.45903e-115	down	PTHR24078 - DNAJ HOMOLOG SUBFAMILY C MEMBER (1 of 187)
Lus10017331.g.BGIv1.0	71.1483	-1.45582	0.243532	-5.97794	2.25972e-09	4.1898e-08	down	KOG1255 - Succinyl-CoA synthetase, alpha subunit (1 of 4)
Lus10004387.g.BGIv1.0	242.941	-1.45597	0.13229	-11.0059	3.57961e-28	2.91773e-26	down	1.14.11.19 - Leucocyanidin oxygenase / Leucoanthocyanidin dioxygenase (1 of 6)
Lus10011578.g.BGIv1.0	40.7902	-1.4587	0.317453	-4.59501	4.32724e-06	4.70283e-05	down	PTHR23042:SF61 - TRANSCRIPTION FACTOR BHLH18-RELATED (1 of 8)
Lus10036375.g.BGIv1.0	12.4082	-1.45978	0.583259	-2.5028	0.0123214	0.0486356	down	PF01535//PF13041//PF13812 - PPR repeat (PPR) // PPR repeat family (PPR_2) // Pentatricopeptide repeat domain (PPR_3) (1 of 65)
Lus10014008.g.BGIv1.0	300.01	-1.46117	0.119262	-12.2518	1.6433e-34	1.76041e-32	down	?
Lus10014881.g.BGIv1.0	120.486	-1.46201	0.202029	-7.23665	4.59886e-13	1.29001e-11	down	?
Lus10007601.g.BGIv1.0	91.1845	-1.46238	0.218864	-6.68168	2.36217e-11	5.60953e-10	down	PF01453//PF07714//PF08276 - D-mannose binding lectin (B_lectin) // Protein tyrosine kinase (Pkinase_Tyr) // PAN-like domain (PAN_2) (1 of 4)
Lus10008769.g.BGIv1.0	19.9098	-1.46384	0.511636	-2.86111	0.00422166	0.0202876	down	PF01903 - CbiX (CbiX) (1 of 2)
Lus10024098.g.BGIv1.0	226.807	-1.4672	0.136074	-10.7824	4.167e-27	3.1599e-25	down	PTHR13683//PTHR13683:SF263 - ASPARTYL PROTEASES // SUBFAMILY NOT NAMED (1 of 2)
Lus10027142.g.BGIv1.0	100.691	-1.46805	0.2118	-6.93131	4.16975e-12	1.06355e-10	down	?
Lus10003665.g.BGIv1.0	719.046	-1.46843	0.0801866	-18.3126	6.56243e-75	2.05045e-72	down	K16190 - glucuronokinase (GLCAK) (1 of 2)
Lus10006828.g.BGIv1.0	235.804	-1.46888	0.152457	-9.63469	5.70656e-22	3.28054e-20	down	PTHR13360:SF1 - ACTIVATING SIGNAL COINTEGRATOR 1 COMPLEX SUBUNIT 1 (1 of 2)
Lus10021473.g.BGIv1.0	15.4325	-1.46894	0.516587	-2.84354	0.00446148	0.0212675	down	PTHR23241:SF50 - LATE EMBRYOGENESIS ABUNDANT DOMAIN-CONTAINING PROTEIN-RELATED (1 of 4)
Lus10025807.g.BGIv1.0	124.973	-1.47146	0.187522	-7.8469	4.26452e-15	1.47294e-13	down	PF04043 - Plant invertase/pectin methylesterase inhibitor (PMEI) (1 of 150)
Lus10036099.g.BGIv1.0	949.261	-1.47705	0.0694513	-21.2675	2.27274e-100	1.06519e-97	down	K03834 - tyrosine-specific transport protein (tyrP) (1 of 3)
Lus10032008.g.BGIv1.0	71.1665	-1.47908	0.242415	-6.10145	1.05113e-09	2.0444e-08	down	?
Lus10024073.g.BGIv1.0	16.9721	-1.47937	0.508746	-2.90787	0.00363905	0.0179348	down	PTHR10217:SF489 - CYCLIC NUCLEOTIDE-GATED ION CHANNEL 7-RELATED (1 of 2)
Lus10037475.g.BGIv1.0	193.794	-1.4803	0.146936	-10.0744	7.16632e-24	4.56278e-22	down	PTHR31741:SF11 - AXI 1 PROTEIN-LIKE PROTEIN (1 of 2)
Lus10014086.g.BGIv1.0	80.3852	-1.48148	0.23571	-6.2852	3.27438e-10	6.78294e-09	down	PTHR11926:SF152 - UDP-GLUCOSYL TRANSFERASE 73B2-RELATED (1 of 7)
Lus10042197.g.BGIv1.0	118.422	-1.48352	0.195942	-7.57119	3.69822e-14	1.16198e-12	down	PTHR10108:SF776 - METHYLTRANSFERASE PMT2-RELATED (1 of 6)
Lus10034502.g.BGIv1.0	89.4051	-1.48361	0.216354	-6.85734	7.01553e-12	1.75569e-10	down	PTHR24298:SF86 - CYTOCHROME P450 71B21-RELATED (1 of 14)
Lus10020245.g.BGIv1.0	124.144	-1.48518	0.197014	-7.53842	4.75694e-14	1.48084e-12	down	PTHR12611 - PUR-TRANSCRIPTIONAL ACTIVATOR (1 of 5)
Lus10034467.g.BGIv1.0	1320.84	-1.48645	0.0597503	-24.8777	1.2965e-136	9.30859e-134	down	PTHR13789:SF185 - FAD/NAD(P)-BINDING OXIDOREDUCTASE FAMILY PROTEIN (1 of 11)
Lus10033562.g.BGIv1.0	175.304	-1.488	0.161176	-9.23219	2.65152e-20	1.38293e-18	down	PTHR12565:SF128 - TRANSCRIPTION FACTOR BHLH75 (1 of 2)
Lus10028966.g.BGIv1.0	65.0938	-1.48911	0.251536	-5.92005	3.21847e-09	5.83283e-08	down	K08740 - DNA mismatch repair protein MSH4 (MSH4) (1 of 2)
Lus10028459.g.BGIv1.0	638.043	-1.49268	0.0904907	-16.4954	3.96032e-61	9.54579e-59	down	PTHR24349:SF87 - CALCIUM-DEPENDENT PROTEIN KINASE 16-RELATED (1 of 2)
Lus10004114.g.BGIv1.0	43.837	-1.49466	0.334964	-4.46216	8.11394e-06	8.24465e-05	down	PF01535 - PPR repeat (PPR) (1 of 695)
Lus10020537.g.BGIv1.0	284.07	-1.49553	0.124332	-12.0286	2.51447e-33	2.56346e-31	down	PF00931//PF12799//PF13676 - NB-ARC domain (NB-ARC) // Leucine Rich repeats (2 copies) (LRR_4) // TIR domain (TIR_2) (1 of 1)
Lus10034980.g.BGIv1.0	31.2265	-1.49587	0.376555	-3.97252	7.11157e-05	0.000584958	down	KOG1369 - Hexokinase (1 of 3)
Lus10036732.g.BGIv1.0	29.4769	-1.49824	0.371855	-4.0291	5.59913e-05	0.00047283	down	PTHR12565:SF148 - PROTEIN BANQUO 3 (1 of 4)
Lus10006886.g.BGIv1.0	227.98	-1.49836	0.136346	-10.9894	4.29863e-28	3.48695e-26	down	?
Lus10023549.g.BGIv1.0	35.7412	-1.49867	0.341719	-4.38568	1.15623e-05	0.000113653	down	1.5.1.3 - Dihydrofolate reductase / Tetrahydrofolate dehydrogenase (1 of 3)
Lus10015918.g.BGIv1.0	88.0833	-1.49926	0.217328	-6.89861	5.25153e-12	1.32744e-10	down	3.5.1.52 - Peptide-N(4)-(N-acetyl-beta-glucosaminyl)asparagine amidase / N-oligosaccharide glycopeptidase (1 of 16)
Lus10023011.g.BGIv1.0	17.5247	-1.49979	0.515344	-2.91027	0.00361118	0.0178209	down	PF02519 - Auxin responsive protein (Auxin_inducible) (1 of 133)
Lus10032078.g.BGIv1.0	25.117	-1.50089	0.409722	-3.66319	0.000249097	0.00178013	down	?
Lus10010597.g.BGIv1.0	123.748	-1.50632	0.19674	-7.65638	1.91249e-14	6.18764e-13	down	?
Lus10021363.g.BGIv1.0	34.5997	-1.50639	0.372273	-4.04648	5.19945e-05	0.000442846	down	5.3.1.16 - 1-(5-phosphoribosyl)-5- ((5-phosphoribosylamino)methylideneamino)imidazole-4-carboxamide isomerase / Phosphoribosylformimino-5-aminoimidazole carboxamide ribotide isomerase (1 of 2)
Lus10033038.g.BGIv1.0	1111.69	-1.50651	0.0766309	-19.6593	4.81045e-86	1.90975e-83	down	PTHR24413:SF75 - BTB/POZ AND TAZ DOMAIN-CONTAINING PROTEIN 2 (1 of 4)
Lus10023751.g.BGIv1.0	26.447	-1.50752	0.405563	-3.71711	0.000201514	0.00147124	down	?
Lus10033549.g.BGIv1.0	355.438	-1.50765	0.110928	-13.5912	4.51776e-42	6.29966e-40	down	PTHR21663 - HYPOTHETICAL HEAT DOMAIN-CONTAINING (1 of 2)
Lus10021221.g.BGIv1.0	82.2093	-1.50849	0.229742	-6.56601	5.16813e-11	1.17996e-09	down	3.5.1.116 - Ureidoglycolate amidohydrolase / Ureidoglycolate hydrolase (1 of 2)
Lus10039131.g.BGIv1.0	129.545	-1.51197	0.178517	-8.46962	2.46191e-17	9.97325e-16	down	PTHR10110:SF119 - SODIUM/HYDROGEN EXCHANGER 5-RELATED (1 of 2)
Lus10030635.g.BGIv1.0	2594.86	-1.51302	0.0457692	-33.0575	1.21303e-239	2.7289e-236	down	PTHR10788:SF14 - ALPHA,ALPHA-TREHALOSE-PHOSPHATE SYNTHASE [UDP-FORMING] 10-RELATED (1 of 4)
Lus10013075.g.BGIv1.0	65.0181	-1.51317	0.265985	-5.68891	1.27852e-08	2.12474e-07	down	PTHR16212:SF4 - FOCADHESIN (1 of 7)
Lus10009515.g.BGIv1.0	119.597	-1.51386	0.186331	-8.12457	4.4895e-16	1.67217e-14	down	?
Lus10036892.g.BGIv1.0	363.123	-1.51666	0.111349	-13.6209	3.00992e-42	4.23208e-40	down	PTHR11468//PTHR11468:SF14 - GLYCOGEN PHOSPHORYLASE // SUBFAMILY NOT NAMED (1 of 2)
Lus10028303.g.BGIv1.0	345.314	-1.51731	0.118119	-12.8456	9.10784e-38	1.08987e-35	down	PTHR23500:SF43 - SUGAR TRANSPORTER ERD6-LIKE 4-RELATED (1 of 4)
Lus10030375.g.BGIv1.0	185.919	-1.51758	0.155992	-9.72855	2.27823e-22	1.33239e-20	down	K16275 - E3 ubiquitin-protein ligase BAH [EC:6.3.2.19] (BAH, NLA) (1 of 3)
Lus10001724.g.BGIv1.0	23.9367	-1.51794	0.473057	-3.20878	0.00133297	0.00765767	down	2.7.7.49//2.7.7.7//3.1.13.2//3.1.26.13//3.4.23.16 - RNA-directed DNA polymerase / Revertase // DNA-directed DNA polymerase / DNA-dependent DNA polymerase // // HIV-1 retropepsin / Human immunodeficiency virus type 1 protease (1 of 1)
Lus10034759.g.BGIv1.0	42.7691	-1.51857	0.337937	-4.49365	7.00127e-06	7.21839e-05	down	2.4.1.259 - Dolichyl-P-Man:Man(6)GlcNAc(2)-PP-dolichol alpha-1,2-mannosyltransferase / Dol-P-Man:Man(6)GlcNAc(2)-PP-Dol alpha-1,2-mannosyltransferase (1 of 5)
Lus10008753.g.BGIv1.0	328.32	-1.51922	0.113042	-13.4394	3.55214e-41	4.646e-39	down	PTHR22981:SF27 - KETOSE-BISPHOSPHATE ALDOLASE CLASS-II FAMILY PROTEIN (1 of 2)
Lus10035389.g.BGIv1.0	73.392	-1.52008	0.249086	-6.10263	1.04338e-09	2.03049e-08	down	PTHR21087:SF0 - INACTIVE SHIKIMATE KINASE LIKE 2, CHLOROPLASTIC-RELATED (1 of 2)
Lus10000723.g.BGIv1.0	46.0497	-1.52106	0.306971	-4.95508	7.23016e-07	9.12422e-06	down	PTHR23241:SF50 - LATE EMBRYOGENESIS ABUNDANT DOMAIN-CONTAINING PROTEIN-RELATED (1 of 4)
Lus10033366.g.BGIv1.0	61.5903	-1.52121	0.271373	-5.60559	2.0755e-08	3.3209e-07	down	PTHR13789//PTHR13789:SF234 - MONOOXYGENASE // SUBFAMILY NOT NAMED (1 of 6)
Lus10036845.g.BGIv1.0	211.014	-1.52242	0.142605	-10.6758	1.32101e-26	9.60724e-25	down	PTHR22950:SF237 - AMINO ACID TRANSPORTER-RELATED (1 of 7)
Lus10023850.g.BGIv1.0	18.8993	-1.5227	0.484182	-3.1449	0.00166145	0.00922434	down	PTHR10209//PTHR10209:SF98 - OXIDOREDUCTASE, 2OG-FE II OXYGENASE FAMILY PROTEIN // SUBFAMILY NOT NAMED (1 of 2)
Lus10017785.g.BGIv1.0	59.9055	-1.52369	0.27109	-5.6206	1.903e-08	3.06523e-07	down	PTHR11289:SF0 - BREAST CANCER TYPE 2 SUSCEPTIBILITY PROTEIN (1 of 3)
Lus10024075.g.BGIv1.0	19.1944	-1.52472	0.484371	-3.14783	0.00164488	0.00914442	down	PTHR24347:SF199 - CBL-INTERACTING SERINE/THREONINE-PROTEIN KINASE 25-RELATED (1 of 4)
Lus10036722.g.BGIv1.0	220.731	-1.52534	0.144435	-10.5608	4.52864e-26	3.22403e-24	down	2.7.7.49//2.7.7.7//3.1.26.4 - RNA-directed DNA polymerase / Revertase // DNA-directed DNA polymerase / DNA-dependent DNA polymerase // Ribonuclease H / RNase H (1 of 1)
Lus10038191.g.BGIv1.0	13.768	-1.52543	0.609975	-2.5008	0.0123913	0.0488829	down	PF02519 - Auxin responsive protein (Auxin_inducible) (1 of 133)
Lus10025465.g.BGIv1.0	38.714	-1.52665	0.381297	-4.00382	6.23267e-05	0.000520126	down	PF08423 - Rad51 (Rad51) (1 of 14)
Lus10015437.g.BGIv1.0	681.096	-1.5274	0.0798425	-19.1302	1.41654e-81	4.82838e-79	down	PTHR31579:SF11 - EXPRESSED PROTEIN (1 of 2)
Lus10016093.g.BGIv1.0	197.142	-1.52922	0.152112	-10.0533	8.88706e-24	5.59503e-22	down	2.8.2.20 - Protein-tyrosine sulfotransferase / Tyrosylprotein sulfotransferase (1 of 1)
Lus10013173.g.BGIv1.0	323.668	-1.53093	0.119497	-12.8115	1.41334e-37	1.68526e-35	down	PTHR10578:SF67 - PEROXISOMAL (S)-2-HYDROXY-ACID OXIDASE GLO3-RELATED (1 of 4)
Lus10016771.g.BGIv1.0	141.996	-1.53261	0.175838	-8.71604	2.88091e-18	1.25928e-16	down	PTHR24319:SF26 - PROTEIN DHS-1 (1 of 2)
Lus10029627.g.BGIv1.0	66.681	-1.53402	0.257312	-5.9617	2.49625e-09	4.58552e-08	down	?
Lus10039183.g.BGIv1.0	26.1645	-1.53546	0.402611	-3.81375	0.000136875	0.00104404	down	PF05910 - Plant protein of unknown function (DUF868) (DUF868) (1 of 18)
Lus10015384.g.BGIv1.0	265.755	-1.53846	0.131202	-11.7259	9.39406e-32	8.90456e-30	down	PTHR15744 - BLOM7 (1 of 3)
Lus10033826.g.BGIv1.0	132.721	-1.53913	0.183825	-8.37279	5.62705e-17	2.22347e-15	down	PTHR10857:SF26 - PROTEIN BONZAI 3 (1 of 4)
Lus10026977.g.BGIv1.0	39.4886	-1.5402	0.334126	-4.60966	4.03334e-06	4.41183e-05	down	PTHR31374:SF7 - AUXIN INDUCED LIKE-PROTEIN (1 of 1)
Lus10036046.g.BGIv1.0	98.2982	-1.54102	0.219187	-7.03061	2.05631e-12	5.40422e-11	down	PTHR22835//PTHR22835:SF207 - ZINC FINGER FYVE DOMAIN CONTAINING PROTEIN // SUBFAMILY NOT NAMED (1 of 2)
Lus10040918.g.BGIv1.0	81.3093	-1.54286	0.231011	-6.67874	2.41005e-11	5.7192e-10	down	PTHR23077:SF9 - PEROXISOME ASSEMBLY FACTOR 2 (1 of 2)
Lus10023469.g.BGIv1.0	33.3661	-1.54696	0.359891	-4.29841	1.72029e-05	0.000162973	down	PTHR13271//PTHR13271:SF11 - UNCHARACTERIZED PUTATIVE METHYLTRANSFERASE // SUBFAMILY NOT NAMED (1 of 2)
Lus10041145.g.BGIv1.0	26.0097	-1.54877	0.430716	-3.59581	0.00032339	0.00223225	down	PTHR10641//PTHR10641:SF523 - MYB-LIKE DNA-BINDING PROTEIN MYB // SUBFAMILY NOT NAMED (1 of 8)
Lus10020525.g.BGIv1.0	282.099	-1.55	0.133111	-11.6445	2.44841e-31	2.28237e-29	down	KOG0617 - Ras suppressor protein (contains leucine-rich repeats) (1 of 22)
Lus10035840.g.BGIv1.0	110.305	-1.55063	0.195225	-7.94276	1.97734e-15	7.01634e-14	down	PF03514 - GRAS domain family (GRAS) (1 of 119)
Lus10015209.g.BGIv1.0	13.0924	-1.55098	0.579861	-2.67475	0.00747842	0.0324252	down	PTHR32278:SF2 - F-BOX PROTEIN PP2-B13-RELATED (1 of 9)
Lus10033157.g.BGIv1.0	37.632	-1.55139	0.341127	-4.54783	5.42011e-06	5.75706e-05	down	?
Lus10005747.g.BGIv1.0	32.5344	-1.55168	0.372606	-4.16442	3.12151e-05	0.000279775	down	?
Lus10018309.g.BGIv1.0	138.669	-1.55172	0.173392	-8.94922	3.57988e-19	1.6872e-17	down	PTHR11017:SF169 - DISEASE RESISTANCE PROTEIN-RELATED (1 of 61)
Lus10000064.g.BGIv1.0	32.3438	-1.55224	0.429974	-3.61008	0.000306107	0.00212718	down	PTHR11139:SF72 - SERINE-PROTEIN KINASE ATM (1 of 2)
Lus10013074.g.BGIv1.0	164.793	-1.55256	0.191191	-8.12049	4.64317e-16	1.7275e-14	down	PF12530 - Protein of unknown function (DUF3730) (DUF3730) (1 of 3)
Lus10029339.g.BGIv1.0	18.575	-1.55265	0.482712	-3.21652	0.00129756	0.00748608	down	PF05678//PF13456 - VQ motif (VQ) // Reverse transcriptase-like (RVT_3) (1 of 1)
Lus10042562.g.BGIv1.0	578.893	-1.55336	0.0904895	-17.1662	4.75296e-66	1.27293e-63	down	?
Lus10038915.g.BGIv1.0	1182.68	-1.55358	0.0622119	-24.9724	1.21918e-137	8.94378e-135	down	PTHR31080:SF19 - PLANT INVERTASE/PECTIN METHYLESTERASE INHIBITOR SUPERFAMILY PROTEIN (1 of 5)
Lus10017820.g.BGIv1.0	67.6158	-1.55384	0.255472	-6.08224	1.18516e-09	2.29057e-08	down	PTHR31352:SF2 - BETA-AMYLASE 7 (1 of 3)
Lus10041052.g.BGIv1.0	21.217	-1.55518	0.47368	-3.28319	0.00102639	0.00612582	down	PF00847 - AP2 domain (AP2) (1 of 230)
Lus10014204.g.BGIv1.0	12.9338	-1.55847	0.590737	-2.63818	0.00833515	0.0354914	down	PTHR12585:SF26 - SISTER CHROMATID COHESION 1 PROTEIN 1 (1 of 2)
Lus10014041.g.BGIv1.0	589.199	-1.55939	0.0895368	-17.4162	6.22155e-68	1.70688e-65	down	K17065 - dynamin 1-like protein (DNM1L) (1 of 4)
Lus10032006.g.BGIv1.0	751.323	-1.56345	0.0790507	-19.7778	4.62518e-87	1.85805e-84	down	K18696 - glycerophosphodiester phosphodiesterase (GDE1) (1 of 3)
Lus10011137.g.BGIv1.0	576.784	-1.56564	0.0887729	-17.6365	1.29324e-69	3.63671e-67	down	PTHR33172:SF2 - EMB (1 of 6)
Lus10032935.g.BGIv1.0	1448.3	-1.56613	0.060631	-25.8305	4.03125e-147	3.48806e-144	down	PTHR33231:SF1 - 30S RIBOSOMAL PROTEIN-RELATED (1 of 2)
Lus10031584.g.BGIv1.0	12.4509	-1.56738	0.589264	-2.6599	0.00781647	0.0336394	down	PTHR31717:SF13 - CCT MOTIF FAMILY PROTEIN-RELATED (1 of 3)
Lus10006887.g.BGIv1.0	979.353	-1.57076	0.0697631	-22.5156	2.9201e-112	1.58933e-109	down	PTHR23273 - REPLICATION FACTOR A 1, RFA1 (1 of 24)
Lus10000427.g.BGIv1.0	320.272	-1.57201	0.24632	-6.38199	1.74796e-10	3.78838e-09	down	PTHR10763 - CELL DIVISION CONTROL PROTEIN 6-RELATED (1 of 6)
Lus10006590.g.BGIv1.0	353.417	-1.57327	0.111196	-14.1487	1.90258e-45	2.98616e-43	down	PTHR22952:SF90 - BASIC LEUCINE ZIPPER 63 (1 of 5)
Lus10008082.g.BGIv1.0	113.194	-1.57412	0.196083	-8.02785	9.9199e-16	3.6033e-14	down	PF00027//PF07885//PF12796 - Cyclic nucleotide-binding domain (cNMP_binding) // Ion channel (Ion_trans_2) // Ankyrin repeats (3 copies) (Ank_2) (1 of 1)
Lus10031403.g.BGIv1.0	24.9062	-1.57502	0.440972	-3.57169	0.000354682	0.0024189	down	PTHR13620:SF15 - EXONUCLEASE MUT-7 HOMOLOG-RELATED (1 of 4)
Lus10041622.g.BGIv1.0	175.678	-1.57753	0.157854	-9.99363	1.62512e-23	1.00623e-21	down	?
Lus10023231.g.BGIv1.0	61.714	-1.57834	0.263946	-5.97981	2.23402e-09	4.14671e-08	down	?
Lus10030452.g.BGIv1.0	30.3127	-1.57924	0.396074	-3.98723	6.68505e-05	0.000553452	down	PTHR10641:SF473 - MYB TRANSCRIPTION FACTOR (1 of 4)
Lus10028442.g.BGIv1.0	28.8464	-1.58031	0.385694	-4.09732	4.17966e-05	0.000364263	down	2.8.1.1 - Thiosulfate sulfurtransferase / Thiosulfate thiotransferase (1 of 12)
Lus10042312.g.BGIv1.0	158.4	-1.58157	0.166956	-9.47295	2.72048e-21	1.50991e-19	down	PTHR10366//PTHR10366:SF375 - NAD DEPENDENT EPIMERASE/DEHYDRATASE // SUBFAMILY NOT NAMED (1 of 8)
Lus10003299.g.BGIv1.0	45.8443	-1.5827	0.314851	-5.02682	4.98682e-07	6.48478e-06	down	?
Lus10032627.g.BGIv1.0	155.085	-1.58273	0.167961	-9.4232	4.37562e-21	2.397e-19	down	KOG2270 - Serine/threonine protein kinase involved in cell cycle control (1 of 1)
Lus10007665.g.BGIv1.0	56.3185	-1.58606	0.275294	-5.76132	8.3458e-09	1.42525e-07	down	K16743 - abnormal spindle-like microcephaly-associated protein (ASPM, ASP) (1 of 1)
Lus10002411.g.BGIv1.0	28.3368	-1.58677	0.395231	-4.0148	5.94973e-05	0.000499188	down	?
Lus10010855.g.BGIv1.0	644.344	-1.58757	0.0885749	-17.9235	7.73636e-72	2.23131e-69	down	PTHR22950:SF313 - AMINO ACID TRANSPORTER FAMILY PROTEIN-RELATED (1 of 2)
Lus10025720.g.BGIv1.0	21.8513	-1.58819	0.44201	-3.59312	0.000326748	0.00225252	down	PF13456 - Reverse transcriptase-like (RVT_3) (1 of 46)
Lus10004133.g.BGIv1.0	12.5299	-1.58844	0.585472	-2.7131	0.0066657	0.0295228	down	?
Lus10035442.g.BGIv1.0	29.4188	-1.58971	0.391208	-4.06359	4.83228e-05	0.00041503	down	K10406 - kinesin family member C2/C3 (KIFC2_3) (1 of 19)
Lus10004239.g.BGIv1.0	16.444	-1.59016	0.523129	-3.03971	0.00236806	0.0124801	down	1.2.1.8 - Betaine-aldehyde dehydrogenase / Betaine aldehyde oxidase (1 of 6)
Lus10019123.g.BGIv1.0	155.246	-1.59496	0.174239	-9.15384	5.49447e-20	2.78395e-18	down	PTHR35515:SF1 - NADH DEHYDROGENASE-LIKE COMPLEX N (1 of 2)
Lus10010747.g.BGIv1.0	14.0464	-1.59828	0.576363	-2.77305	0.00555331	0.0253856	down	PTHR31719:SF6 - NAC (NO APICAL MERISTEM) DOMAIN TRANSCRIPTIONAL REGULATOR SUPERFAMILY PROTEIN (1 of 4)
Lus10017786.g.BGIv1.0	16.7213	-1.59914	0.5264	-3.03788	0.00238245	0.0125481	down	PF00634 - BRCA2 repeat (BRCA2) (1 of 3)
Lus10030134.g.BGIv1.0	94.5509	-1.60157	0.224762	-7.12565	1.03589e-12	2.80773e-11	down	PTHR24349:SF116 - CALCIUM-DEPENDENT PROTEIN KINASE 7 (1 of 4)
Lus10003184.g.BGIv1.0	63.8721	-1.60728	0.265048	-6.0641	1.32693e-09	2.54561e-08	down	PTHR23257:SF367 - OCTICOSAPEPTIDE/PHOX/BEM1P DOMAIN-CONTAINING PROTEIN KINASE (1 of 3)
Lus10026548.g.BGIv1.0	117.062	-1.60734	0.207801	-7.735	1.03405e-14	3.44121e-13	down	PF04674 - Phosphate-induced protein 1 conserved region (Phi_1) (1 of 13)
Lus10034970.g.BGIv1.0	42.2338	-1.60996	0.325722	-4.94275	7.70282e-07	9.65929e-06	down	PTHR21068:SF5 - GENOMIC DNA, CHROMOSOME 3, P1 CLONE: MIL23-RELATED (1 of 4)
Lus10024902.g.BGIv1.0	85.2625	-1.61331	0.226381	-7.12655	1.02917e-12	2.79174e-11	down	5.3.1.13 - Arabinose-5-phosphate isomerase / Phosphoarabinoisomerase (1 of 3)
Lus10006904.g.BGIv1.0	22.0608	-1.61667	0.509074	-3.1757	0.00149476	0.00843068	down	PTHR11200//PTHR11200:SF159 - INOSITOL 5-PHOSPHATASE // SUBFAMILY NOT NAMED (1 of 4)
Lus10028391.g.BGIv1.0	13.8623	-1.61942	0.581363	-2.78556	0.00534356	0.0246269	down	?
Lus10037616.g.BGIv1.0	138.323	-1.62047	0.191621	-8.45663	2.7521e-17	1.11221e-15	down	PTHR22908:SF66 - MIDASIN (1 of 4)
Lus10029141.g.BGIv1.0	12.6465	-1.62134	0.620923	-2.61118	0.00902316	0.0377634	down	PTHR13009 - HEAT SHOCK PROTEIN 90 HSP90 CO-CHAPERONE AHA-1 (1 of 5)
Lus10010374.g.BGIv1.0	67.7604	-1.62308	0.288791	-5.62026	1.90671e-08	3.06976e-07	down	PTHR16212:SF4 - FOCADHESIN (1 of 7)
Lus10021370.g.BGIv1.0	293.927	-1.6235	0.126983	-12.7852	1.98455e-37	2.34157e-35	down	PTHR31279:SF3 - (PHI-1) PROTEIN, PUTATIVE-RELATED (1 of 2)
Lus10016014.g.BGIv1.0	1261.57	-1.62855	0.0601491	-27.0752	1.92687e-161	2.03195e-158	down	PTHR24413:SF79 - BTB/POZ DOMAIN-CONTAINING PROTEIN 9 (1 of 2)
Lus10023882.g.BGIv1.0	48.7849	-1.62919	0.30396	-5.35989	8.32735e-08	1.22496e-06	down	PF00450//PF02170//PF02171//PF08699//PF16486//PF16488 - Serine carboxypeptidase (Peptidase_S10) // PAZ domain (PAZ) // Piwi domain (Piwi) // Argonaute linker 1 domain (ArgoL1) // N-terminal domain of argonaute (ArgoN) // Argonaute linker 2 domain (ArgoL2) (1 of 1)
Lus10002783.g.BGIv1.0	58.6743	-1.63211	0.288086	-5.66537	1.46712e-08	2.40914e-07	down	PTHR10791//PTHR10791:SF23 - RAG1-ACTIVATING PROTEIN 1 // SUBFAMILY NOT NAMED (1 of 5)
Lus10031253.g.BGIv1.0	38.5427	-1.63559	0.355984	-4.59456	4.33669e-06	4.70855e-05	down	PTHR22850:SF94 - WD40 DOMAIN-CONTAINING PROTEIN (1 of 2)
Lus10001725.g.BGIv1.0	737.301	-1.63589	0.084882	-19.2725	9.14252e-83	3.31736e-80	down	PTHR21089//PTHR21089:SF10 - SHIKIMATE DEHYDROGENASE // SUBFAMILY NOT NAMED (1 of 2)
Lus10001908.g.BGIv1.0	60.6716	-1.63614	0.287604	-5.68887	1.27881e-08	2.12474e-07	down	PTHR22950:SF229 - GABA TRANSPORTER 2-RELATED (1 of 2)
Lus10012530.g.BGIv1.0	36.7097	-1.6362	0.357979	-4.57065	4.86211e-06	5.23189e-05	down	PTHR23074:SF17 - FIDGETIN-LIKE PROTEIN 1 (1 of 2)
Lus10025012.g.BGIv1.0	256.178	-1.63706	0.135738	-12.0604	1.70898e-33	1.75822e-31	down	PTHR23088//PTHR23088:SF20 - NITRILASE-RELATED // SUBFAMILY NOT NAMED (1 of 2)
Lus10007681.g.BGIv1.0	188.578	-1.63811	0.159904	-10.2443	1.2551e-24	8.40341e-23	down	?
Lus10004371.g.BGIv1.0	266.854	-1.6387	0.13356	-12.2694	1.32253e-34	1.42583e-32	down	PTHR13994:SF9 - NUDIX HYDROLASE 8 (1 of 2)
Lus10042746.g.BGIv1.0	12.2737	-1.63885	0.61999	-2.64335	0.00820905	0.0350075	down	PTHR10797:SF14 - CCR4-ASSOCIATED FACTOR 1 HOMOLOG 10-RELATED (1 of 5)
Lus10042563.g.BGIv1.0	586.449	-1.639	0.0886115	-18.4964	2.20549e-76	6.95555e-74	down	?
Lus10037784.g.BGIv1.0	21.6825	-1.63905	0.441793	-3.71	0.000207261	0.00150961	down	PTHR12409 - PREFOLDIN SUBUNIT 3 (1 of 4)
Lus10018839.g.BGIv1.0	409.136	-1.63932	0.105775	-15.4981	3.57418e-54	7.2657e-52	down	PTHR10024:SF225 - C2 CALCIUM/LIPID-BINDING PLANT PHOSPHORIBOSYLTRANSFERASE FAMILY PROTEIN (1 of 2)
Lus10000060.g.BGIv1.0	12.2457	-1.64056	0.605933	-2.70749	0.00677942	0.0299361	down	3.2.1.142 - Limit dextrinase / R-enzyme (1 of 3)
Lus10034238.g.BGIv1.0	77.1648	-1.64335	0.243656	-6.74456	1.53495e-11	3.72104e-10	down	PTHR11728:SF13 - GLYCEROL-3-PHOSPHATE DEHYDROGENASE [NAD(+)] 2, CHLOROPLASTIC (1 of 2)
Lus10041914.g.BGIv1.0	455.084	-1.64387	0.100344	-16.3824	2.55575e-60	5.94785e-58	down	PTHR24349:SF87 - CALCIUM-DEPENDENT PROTEIN KINASE 16-RELATED (1 of 2)
Lus10035662.g.BGIv1.0	82.5703	-1.647	0.267819	-6.1497	7.76314e-10	1.53455e-08	down	K00913 - inositol-1,3,4-trisphosphate 5/6-kinase / inositol-tetrakisphosphate 1-kinase (ITPK1) (1 of 5)
Lus10037728.g.BGIv1.0	40.4061	-1.64844	0.329859	-4.99741	5.8106e-07	7.47536e-06	down	3.2.1.37//3.2.1.55 - Xylan 1,4-beta-xylosidase / Xylobiase // Non-reducing end alpha-L-arabinofuranosidase / Arabinosidase (1 of 4)
Lus10012235.g.BGIv1.0	25.6488	-1.65505	0.42142	-3.92733	8.58954e-05	0.00069476	down	PF13041 - PPR repeat family (PPR_2) (1 of 719)
Lus10027972.g.BGIv1.0	12.4115	-1.65582	0.593191	-2.79138	0.0052484	0.0242713	down	PTHR27006:SF36 - LRR RECEPTOR-LIKE SERINE/THREONINE-PROTEIN KINASE RKF3-RELATED (1 of 9)
Lus10041526.g.BGIv1.0	25.8299	-1.65588	0.416837	-3.97249	7.11241e-05	0.000584958	down	PTHR31717:SF3 - ZINC FINGER PROTEIN CONSTANS-LIKE 14-RELATED (1 of 3)
Lus10005699.g.BGIv1.0	60.7306	-1.65772	0.272878	-6.07496	1.2402e-09	2.38873e-08	down	?
Lus10002132.g.BGIv1.0	11.5579	-1.66009	0.637764	-2.60298	0.00924164	0.0384679	down	?
Lus10016046.g.BGIv1.0	1052.04	-1.66032	0.0751655	-22.0889	4.03924e-108	2.06521e-105	down	PTHR31651:SF5 - AUXIN EFFLUX CARRIER FAMILY PROTEIN-RELATED (1 of 5)
Lus10007834.g.BGIv1.0	38.4301	-1.66211	0.33475	-4.96523	6.8621e-07	8.69879e-06	down	?
Lus10036249.g.BGIv1.0	54.0281	-1.66802	0.283497	-5.88372	4.0114e-09	7.16216e-08	down	PTHR10044//PTHR10044:SF103 - INHIBITOR OF APOPTOSIS // SUBFAMILY NOT NAMED (1 of 3)
Lus10022779.g.BGIv1.0	13.6617	-1.66824	0.561533	-2.97087	0.00296957	0.015144	down	?
Lus10013800.g.BGIv1.0	113.453	-1.67016	0.193281	-8.64111	5.56703e-18	2.37196e-16	down	PF03641//PF07731 - Possible lysine decarboxylase (Lysine_decarbox) // Multicopper oxidase (Cu-oxidase_2) (1 of 1)
Lus10021794.g.BGIv1.0	18.6339	-1.67374	0.472928	-3.53909	0.000401508	0.0026904	down	?
Lus10027452.g.BGIv1.0	22.4507	-1.67694	0.471949	-3.55323	0.000380537	0.00256773	down	1.14.13.88 - Flavonoid 3',5'-hydroxylase / F3'5'H (1 of 4)
Lus10040384.g.BGIv1.0	38.6446	-1.67935	0.369331	-4.547	5.44165e-06	5.77448e-05	down	PTHR10445:SF2 - TRANSCRIPTION INITIATION FACTOR IIF, BETA SUBUNIT (1 of 4)
Lus10007935.g.BGIv1.0	30.6641	-1.68306	0.406966	-4.13564	3.53971e-05	0.000313593	down	?
Lus10009514.g.BGIv1.0	147.933	-1.68532	0.178499	-9.44161	3.67098e-21	2.02083e-19	down	?
Lus10023989.g.BGIv1.0	206.87	-1.68538	0.151268	-11.1417	7.85961e-29	6.66388e-27	down	PTHR23257:SF347 - SERINE/THREONINE-PROTEIN KINASE KINX-RELATED (1 of 2)
Lus10024915.g.BGIv1.0	10.4706	-1.68648	0.633594	-2.66176	0.00777334	0.0334794	down	?
Lus10036541.g.BGIv1.0	431.72	-1.68945	0.109635	-15.4098	1.40728e-53	2.79345e-51	down	KOG2346 - Uncharacterized conserved protein (1 of 1)
Lus10038307.g.BGIv1.0	166.031	-1.69007	0.1614	-10.4713	1.16993e-25	8.12334e-24	down	?
Lus10027964.g.BGIv1.0	39.5999	-1.6908	0.337985	-5.0026	5.65635e-07	7.29082e-06	down	PTHR27001:SF54 - RECEPTOR-LIKE CYTOPLASMIC KINASE VIA5 (1 of 2)
Lus10005436.g.BGIv1.0	73.0576	-1.69152	0.24082	-7.02398	2.15633e-12	5.64072e-11	down	PTHR12542//PTHR12542:SF17 - EXOCYST COMPLEX PROTEIN EXO70 // SUBFAMILY NOT NAMED (1 of 5)
Lus10042901.g.BGIv1.0	101.455	-1.69232	0.226105	-7.48467	7.17283e-14	2.20846e-12	down	PF00289//PF02785//PF02786 - Carbamoyl-phosphate synthase L chain, N-terminal domain (CPSase_L_chain) // Biotin carboxylase C-terminal domain (Biotin_carb_C) // Carbamoyl-phosphate synthase L chain, ATP binding domain (CPSase_L_D2) (1 of 2)
Lus10000912.g.BGIv1.0	109.595	-1.69312	0.203488	-8.32048	8.76074e-17	3.40982e-15	down	PF00128//PF02806 - Alpha amylase, catalytic domain (Alpha-amylase) // Alpha amylase, C-terminal all-beta domain (Alpha-amylase_C) (1 of 1)
Lus10036690.g.BGIv1.0	51.1036	-1.6953	0.298469	-5.67999	1.34704e-08	2.23042e-07	down	PTHR16263:SF4 - TETRATRICOPEPTIDE REPEAT PROTEIN 38 (1 of 3)
Lus10013470.g.BGIv1.0	90.4486	-1.69666	0.228643	-7.42057	1.1662e-13	3.51998e-12	down	PTHR10165 - LIPID PHOSPHATE PHOSPHATASE (1 of 7)
Lus10042082.g.BGIv1.0	243.432	-1.70461	0.14702	-11.5944	4.398e-31	4.06605e-29	down	PTHR24413:SF75 - BTB/POZ AND TAZ DOMAIN-CONTAINING PROTEIN 2 (1 of 4)
Lus10001325.g.BGIv1.0	22.4712	-1.70732	0.456151	-3.74288	0.00018192	0.00134507	down	?
Lus10025060.g.BGIv1.0	609.199	-1.70917	0.092065	-18.5649	6.18573e-77	1.96922e-74	down	PTHR24078 - DNAJ HOMOLOG SUBFAMILY C MEMBER (1 of 187)
Lus10010221.g.BGIv1.0	17.4604	-1.7101	0.509881	-3.35391	0.000796775	0.00490373	down	PTHR11017//PTHR11017:SF162 - LEUCINE-RICH REPEAT-CONTAINING PROTEIN // SUBFAMILY NOT NAMED (1 of 62)
Lus10026689.g.BGIv1.0	14.0052	-1.71316	0.564597	-3.03431	0.0024109	0.0126683	down	PF00069//PF01476 - Protein kinase domain (Pkinase) // LysM domain (LysM) (1 of 8)
Lus10025388.g.BGIv1.0	31.9699	-1.71396	0.381485	-4.49286	7.02716e-06	7.24066e-05	down	PF02362 - B3 DNA binding domain (B3) (1 of 143)
Lus10015338.g.BGIv1.0	62.1341	-1.71486	0.276746	-6.1965	5.77333e-10	1.15552e-08	down	?
Lus10004130.g.BGIv1.0	870.36	-1.71746	0.0794865	-21.607	1.54328e-103	7.77283e-101	down	PTHR21089//PTHR21089:SF10 - SHIKIMATE DEHYDROGENASE // SUBFAMILY NOT NAMED (1 of 2)
Lus10020779.g.BGIv1.0	18.3505	-1.7202	0.486095	-3.53881	0.000401932	0.00269195	down	PF05659//PF13401 - Arabidopsis broad-spectrum mildew resistance protein RPW8 (RPW8) // AAA domain (AAA_22) (1 of 2)
Lus10038376.g.BGIv1.0	10.5871	-1.72072	0.64171	-2.68147	0.00733004	0.0319082	down	PTHR11076:SF38 - DNA POLYMERASE ETA (1 of 2)
Lus10039535.g.BGIv1.0	219.314	-1.72547	0.145486	-11.86	1.9089e-32	1.85103e-30	down	?
Lus10022773.g.BGIv1.0	46.4491	-1.72597	0.312812	-5.51759	3.43676e-08	5.35674e-07	down	?
Lus10009959.g.BGIv1.0	88.0135	-1.73016	0.2211	-7.82524	5.06695e-15	1.73764e-13	down	PTHR19241//PTHR19241:SF247 - ATP-BINDING CASSETTE TRANSPORTER // SUBFAMILY NOT NAMED (1 of 8)
Lus10028489.g.BGIv1.0	55.142	-1.74143	0.290133	-6.00218	1.94682e-09	3.63762e-08	down	PTHR10165 - LIPID PHOSPHATE PHOSPHATASE (1 of 7)
Lus10022078.g.BGIv1.0	77.3399	-1.74175	0.241958	-7.19858	6.08446e-13	1.68849e-11	down	6.4.1.4 - Methylcrotonoyl-CoA carboxylase / Methylcrotonyl-CoA carboxylase (1 of 5)
Lus10001084.g.BGIv1.0	483.016	-1.74185	0.105774	-16.4677	6.26264e-61	1.47785e-58	down	PF00004//PF02190 - ATPase family associated with various cellular activities (AAA) (AAA) // ATP-dependent protease La (LON) substrate-binding domain (LON_substr_bdg) (1 of 1)
Lus10011237.g.BGIv1.0	388	-1.74444	0.108288	-16.1094	2.19251e-58	4.89974e-56	down	3.2.1.145//3.2.1.23 - Beta-galactosidase / Lactase (1 of 4)
Lus10041748.g.BGIv1.0	204.371	-1.74965	0.146702	-11.9265	8.60998e-33	8.54541e-31	down	PTHR23500:SF43 - SUGAR TRANSPORTER ERD6-LIKE 4-RELATED (1 of 4)
Lus10026377.g.BGIv1.0	278.428	-1.75106	0.130253	-13.4435	3.35959e-41	4.41126e-39	down	PF00168//PF00614 - C2 domain (C2) // Phospholipase D Active site motif (PLDc) (1 of 1)
Lus10031355.g.BGIv1.0	47.7018	-1.75129	0.307262	-5.69967	1.20037e-08	2.0013e-07	down	PTHR12320:SF7 - PROTEIN PHOSPHATASE 2C 26-RELATED (1 of 2)
Lus10043402.g.BGIv1.0	16.6743	-1.75204	0.557674	-3.14169	0.00167973	0.00931052	down	PF02365 - No apical meristem (NAM) protein (NAM) (1 of 189)
Lus10012262.g.BGIv1.0	2239.5	-1.75243	0.0474068	-36.9659	4.04727e-299	1.13813e-295	down	PTHR24413:SF79 - BTB/POZ DOMAIN-CONTAINING PROTEIN 9 (1 of 2)
Lus10042311.g.BGIv1.0	129.677	-1.75244	0.186925	-9.37514	6.90848e-21	3.742e-19	down	PTHR10366//PTHR10366:SF375 - NAD DEPENDENT EPIMERASE/DEHYDRATASE // SUBFAMILY NOT NAMED (1 of 8)
Lus10017637.g.BGIv1.0	41.6639	-1.75757	0.319995	-5.4925	3.96277e-08	6.12568e-07	down	3.4.21.108 - HtrA2 peptidase / Serine proteinase OMI (1 of 8)
Lus10024534.g.BGIv1.0	416.925	-1.75869	0.111769	-15.7351	8.69589e-56	1.89318e-53	down	3.1.21.7 - Deoxyribonuclease V / Escherichia coli endodeoxyribonuclease V (1 of 2)
Lus10013076.g.BGIv1.0	120.952	-1.76526	0.194696	-9.06676	1.22614e-19	6.00523e-18	down	PTHR16212:SF4 - FOCADHESIN (1 of 7)
Lus10033987.g.BGIv1.0	1753.6	-1.76738	0.0553125	-31.9526	4.97548e-224	9.32764e-221	down	PTHR11624//PTHR11624:SF83 - DEHYDROGENASE RELATED // SUBFAMILY NOT NAMED (1 of 4)
Lus10040764.g.BGIv1.0	2181.3	-1.76775	0.0483002	-36.5992	2.94848e-293	7.65358e-290	down	PTHR11260:SF303 - GLUTATHIONE S-TRANSFERASE U1-RELATED (1 of 16)
Lus10011047.g.BGIv1.0	15.7287	-1.76932	0.54145	-3.26773	0.00108413	0.00642274	down	PF08387 - FBD (FBD) (1 of 20)
Lus10000362.g.BGIv1.0	94.125	-1.7702	0.234809	-7.5389	4.73943e-14	1.47675e-12	down	PTHR13408 - DNA-DIRECTED RNA POLYMERASE III (1 of 4)
Lus10026729.g.BGIv1.0	89.4214	-1.77529	0.230837	-7.69066	1.46383e-14	4.8192e-13	down	3.1.1.11 - Pectinesterase / Pectin methylesterase (1 of 147)
Lus10024326.g.BGIv1.0	29.342	-1.77857	0.389817	-4.56258	5.05297e-06	5.41826e-05	down	PTHR31374:SF35 - AUXIN-INDUCED PROTEIN-RELATED (1 of 4)
Lus10017516.g.BGIv1.0	4212.19	-1.78008	0.041421	-42.9754	0	0	down	PTHR31268:SF5 - GALACTINOL--SUCROSE GALACTOSYLTRANSFERASE 6-RELATED (1 of 1)
Lus10007223.g.BGIv1.0	35.0244	-1.78274	0.355066	-5.02086	5.14394e-07	6.66087e-06	down	K01762 - 1-aminocyclopropane-1-carboxylate synthase (ACS) (1 of 9)
Lus10014891.g.BGIv1.0	52.5357	-1.78335	0.292801	-6.09066	1.12448e-09	2.18204e-08	down	PTHR10110:SF101 - SODIUM/HYDROGEN EXCHANGER 4 (1 of 2)
Lus10036205.g.BGIv1.0	17.4221	-1.7844	0.522876	-3.41266	0.000643326	0.00407835	down	3.2.1.15 - Polygalacturonase / Pectinase (1 of 79)
Lus10041986.g.BGIv1.0	603.761	-1.78613	0.093272	-19.1497	9.72886e-82	3.38454e-79	down	K13464 - jasmonate ZIM domain-containing protein (JAZ) (1 of 10)
Lus10011715.g.BGIv1.0	42.9567	-1.78692	0.334083	-5.34874	8.85675e-08	1.29662e-06	down	PTHR31096:SF7 - ACR1 (1 of 1)
Lus10007300.g.BGIv1.0	73.0956	-1.78721	0.243499	-7.33968	2.14112e-13	6.22864e-12	down	PTHR11679:SF1 - VACUOLAR PROTEIN SORTING-ASSOCIATED PROTEIN 33B (1 of 4)
Lus10033355.g.BGIv1.0	28.3812	-1.79566	0.411923	-4.3592	1.30538e-05	0.000127312	down	K15813 - beta-amyrin synthase (LUP4) (1 of 4)
Lus10010714.g.BGIv1.0	40.1294	-1.79898	0.339708	-5.29567	1.18584e-07	1.70209e-06	down	PF02519//PF02536 - Auxin responsive protein (Auxin_inducible) // mTERF (mTERF) (1 of 1)
Lus10042064.g.BGIv1.0	161.45	-1.8026	0.16801	-10.7291	7.43145e-27	5.51153e-25	down	3.4.24.56 - Insulysin / Insulinase (1 of 5)
Lus10034191.g.BGIv1.0	13.3939	-1.808	0.583299	-3.09961	0.00193776	0.010528	down	PF07883 - Cupin domain (Cupin_2) (1 of 56)
Lus10039429.g.BGIv1.0	247.958	-1.81042	0.142888	-12.6702	8.6513e-37	9.92987e-35	down	PF00892 - EamA-like transporter family (EamA) (1 of 81)
Lus10017991.g.BGIv1.0	1107.74	-1.81896	0.0674717	-26.9589	4.48488e-160	4.58613e-157	down	K13464 - jasmonate ZIM domain-containing protein (JAZ) (1 of 10)
Lus10018308.g.BGIv1.0	288.367	-1.81903	0.132766	-13.7011	9.99992e-43	1.41191e-40	down	PTHR11017:SF169 - DISEASE RESISTANCE PROTEIN-RELATED (1 of 61)
Lus10026378.g.BGIv1.0	74.6506	-1.82014	0.250614	-7.26271	3.79412e-13	1.0723e-11	down	PTHR18896//PTHR18896:SF15 - PHOSPHOLIPASE D // SUBFAMILY NOT NAMED (1 of 6)
Lus10020450.g.BGIv1.0	239.78	-1.8231	0.152337	-11.9675	5.25627e-33	5.26329e-31	down	?
Lus10011565.g.BGIv1.0	38.9338	-1.82514	0.34641	-5.26874	1.37364e-07	1.95091e-06	down	K01762 - 1-aminocyclopropane-1-carboxylate synthase (ACS) (1 of 9)
Lus10001083.g.BGIv1.0	145.319	-1.82733	0.191215	-9.55643	1.21887e-21	6.88957e-20	down	3.4.21.53 - Endopeptidase La / ATP-dependent serine proteinase (1 of 9)
Lus10000858.g.BGIv1.0	9.83909	-1.83186	0.683584	-2.67978	0.00736703	0.0320444	down	?
Lus10012185.g.BGIv1.0	24.2839	-1.8414	0.469172	-3.92478	8.68084e-05	0.000700299	down	K14488 - SAUR family protein (SAUR) (1 of 68)
Lus10034687.g.BGIv1.0	25.2241	-1.84418	0.451997	-4.08008	4.50209e-05	0.000389294	down	KOG0305 - Anaphase promoting complex, Cdc20, Cdh1, and Ama1 subunits (1 of 5)
Lus10043339.g.BGIv1.0	228.539	-1.84438	0.151096	-12.2067	2.86335e-34	3.01949e-32	down	1.16.1.7//2.7.11.1 - Ferric-chelate reductase (NADH) / NADH:Fe(3+)-EDTA reductase // Non-specific serine/threonine protein kinase / Threonine-specific protein kinase (1 of 1)
Lus10025732.g.BGIv1.0	79.4078	-1.84499	0.243683	-7.57125	3.69636e-14	1.16198e-12	down	KOG0278//KOG0286//KOG0315 - Serine/threonine kinase receptor-associated protein // G-protein beta subunit // G-protein beta subunit-like protein (contains WD40 repeats) (1 of 1)
Lus10011678.g.BGIv1.0	13.82	-1.84583	0.606924	-3.04129	0.00235567	0.0124246	down	PTHR27001:SF89 - PROLINE-RICH RECEPTOR-LIKE PROTEIN KINASE PERK1-RELATED (1 of 5)
Lus10034963.g.BGIv1.0	457.924	-1.84663	0.101914	-18.1195	2.23433e-73	6.5563e-71	down	1.1.1.40 - Malate dehydrogenase (oxaloacetate-decarboxylating) (NADP(+)) / Pyruvic-malic carboxylase (1 of 12)
Lus10021516.g.BGIv1.0	201.036	-1.85479	0.154237	-12.0255	2.60868e-33	2.65151e-31	down	PTHR22814:SF113 - HEAVY-METAL-ASSOCIATED DOMAIN-CONTAINING PROTEIN-RELATED (1 of 5)
Lus10018154.g.BGIv1.0	79.3165	-1.85674	0.252813	-7.34433	2.06786e-13	6.0259e-12	down	PTHR12790 - TRANSCRIPTION INITIATION FACTOR IA RRN3 (1 of 4)
Lus10018084.g.BGIv1.0	22.1569	-1.85855	0.4484	-4.14484	3.40053e-05	0.000302696	down	?
Lus10030681.g.BGIv1.0	491.628	-1.85954	0.0976309	-19.0466	7.00791e-81	2.34141e-78	down	K06675 - structural maintenance of chromosome 4 (SMC4) (1 of 2)
Lus10040614.g.BGIv1.0	64.6474	-1.86331	0.263928	-7.0599	1.66618e-12	4.4237e-11	down	PTHR12860 - SIGNAL RECOGNITION PARTICLE 68 KDA PROTEIN (1 of 3)
Lus10020311.g.BGIv1.0	9.09805	-1.86972	0.716733	-2.60868	0.00908932	0.037965	down	1.11.1.7 - Peroxidase / Lactoperoxidase (1 of 142)
Lus10018469.g.BGIv1.0	9.98492	-1.88443	0.681743	-2.76413	0.00570749	0.0259673	down	PTHR31719:SF9 - ATNAC2-RELATED (1 of 6)
Lus10015046.g.BGIv1.0	30.8109	-1.88779	0.383273	-4.92545	8.41684e-07	1.04614e-05	down	PTHR22763:SF20 - E3 LIGASE SHOOT GRAVITROPISM 9 (1 of 2)
Lus10031569.g.BGIv1.0	73.3018	-1.89627	0.25153	-7.53895	4.73758e-14	1.47675e-12	down	2.4.1.142 - Chitobiosyldiphosphodolichol beta-mannosyltransferase / mannosyltransferase (1 of 3)
Lus10004034.g.BGIv1.0	26.3192	-1.89631	0.433377	-4.37566	1.21064e-05	0.000118587	down	?
Lus10010242.g.BGIv1.0	382.723	-1.9035	0.113624	-16.7526	5.41868e-63	1.37484e-60	down	PTHR23160:SF3 - SYNAPTONEMAL COMPLEX PROTEIN 1-RELATED (1 of 5)
Lus10015208.g.BGIv1.0	54.8028	-1.91378	0.311228	-6.14913	7.79086e-10	1.53744e-08	down	PTHR32278:SF2 - F-BOX PROTEIN PP2-B13-RELATED (1 of 9)
Lus10002576.g.BGIv1.0	74.3588	-1.92121	0.246701	-7.78762	6.82834e-15	2.31348e-13	down	PTHR33077:SF6 - PROTEIN TIFY 9 (1 of 2)
Lus10040691.g.BGIv1.0	7.7639	-1.92672	0.772153	-2.49526	0.0125865	0.0494908	down	PTHR13291 - JOSEPHIN 1, 2 (1 of 2)
Lus10019129.g.BGIv1.0	13.4222	-1.93387	0.580203	-3.33309	0.000858857	0.00523697	down	PF00271//PF16124 - Helicase conserved C-terminal domain (Helicase_C) // RecQ zinc-binding (RecQ_Zn_bind) (1 of 1)
Lus10007656.g.BGIv1.0	589.893	-1.93693	0.0916846	-21.126	4.58653e-99	2.09152e-96	down	K05350 - beta-glucosidase (bglB) (1 of 6)
Lus10039911.g.BGIv1.0	327.068	-1.93876	0.122477	-15.8295	1.94726e-56	4.2669e-54	down	K13464 - jasmonate ZIM domain-containing protein (JAZ) (1 of 10)
Lus10015625.g.BGIv1.0	3199.88	-1.94466	0.0413365	-47.0445	0	0	down	PTHR23421:SF74 - BETA-GALACTOSIDASE 1 (1 of 8)
Lus10022289.g.BGIv1.0	11.3546	-1.9478	0.642829	-3.03004	0.00244522	0.0128227	down	2.4.2.9//2.7.1.48 - Uracil phosphoribosyltransferase / UMP pyrophosphorylase // Uridine kinase / Uridine monophosphokinase (1 of 6)
Lus10017707.g.BGIv1.0	13.0206	-1.95493	0.618549	-3.1605	0.00157497	0.00881091	down	PTHR19241//PTHR19241:SF248 - ATP-BINDING CASSETTE TRANSPORTER // SUBFAMILY NOT NAMED (1 of 4)
Lus10025778.g.BGIv1.0	29.0424	-1.96096	0.393297	-4.98595	6.1657e-07	7.89608e-06	down	PTHR23108:SF0 - METHYLTRANSFERASE-LIKE PROTEIN 22 (1 of 2)
Lus10000294.g.BGIv1.0	149.946	-1.96181	0.185519	-10.5747	3.90359e-26	2.78492e-24	down	PTHR10536 - DNA PRIMASE SMALL SUBUNIT (1 of 2)
Lus10002072.g.BGIv1.0	24.4127	-1.96249	0.458815	-4.27731	1.89164e-05	0.000177414	down	?
Lus10041614.g.BGIv1.0	11.2378	-1.96666	0.630742	-3.118	0.00182082	0.00998919	down	PTHR31194:SF4 - ETHYLENE-RESPONSIVE TRANSCRIPTION FACTOR ERF003 (1 of 5)
Lus10025624.g.BGIv1.0	19.1628	-1.96882	0.53928	-3.65084	0.000261386	0.00185499	down	PF01535//PF13041 - PPR repeat (PPR) // PPR repeat family (PPR_2) (1 of 308)
Lus10001407.g.BGIv1.0	24.7981	-1.96894	0.43575	-4.5185	6.22785e-06	6.50647e-05	down	PTHR23201:SF15 - GIBBERELLIN-REGULATED PROTEIN 7 (1 of 1)
Lus10013496.g.BGIv1.0	105.23	-1.96918	0.222707	-8.842	9.40192e-19	4.24722e-17	down	PTHR11005//PTHR11005:SF30 - LYSOSOMAL ACID LIPASE-RELATED // SUBFAMILY NOT NAMED (1 of 2)
Lus10039419.g.BGIv1.0	120.044	-1.96982	0.206754	-9.52735	1.61342e-21	9.02899e-20	down	PTHR22814:SF84 - HEAVY-METAL-ASSOCIATED DOMAIN-CONTAINING PROTEIN (1 of 2)
Lus10010801.g.BGIv1.0	18.5849	-1.97175	0.496312	-3.97281	7.103e-05	0.000584612	down	PTHR24282:SF45 - CYTOCHROME P450, FAMILY 721, SUBFAMILY A, POLYPEPTIDE 1 (1 of 6)
Lus10034450.g.BGIv1.0	8.70425	-1.97406	0.792393	-2.49127	0.0127288	0.0499455	down	?
Lus10001788.g.BGIv1.0	832.102	-1.9847	0.079333	-25.0174	3.95716e-138	2.96743e-135	down	PF13306//PF13676 - Leucine rich repeats (6 copies) (LRR_5) // TIR domain (TIR_2) (1 of 1)
Lus10015346.g.BGIv1.0	29.7045	-1.98857	0.402603	-4.93928	7.84102e-07	9.82164e-06	down	PF04601 - Domain of unknown function (DUF569) (DUF569) (1 of 9)
Lus10018462.g.BGIv1.0	25.0084	-2.0013	0.475489	-4.20893	2.56584e-05	0.000234392	down	?
Lus10024473.g.BGIv1.0	9.19572	-2.00585	0.761521	-2.63401	0.00843832	0.0358313	down	PF05212 - Protein of unknown function (DUF707) (DUF707) (1 of 23)
Lus10002662.g.BGIv1.0	25.2147	-2.02819	0.457753	-4.43076	9.39034e-06	9.41685e-05	down	KOG2192 - PolyC-binding hnRNP-K protein HRB57A/hnRNP, contains KH domain (1 of 1)
Lus10008525.g.BGIv1.0	12.6175	-2.03397	0.672558	-3.02423	0.00249266	0.013039	down	?
Lus10027384.g.BGIv1.0	72.7343	-2.03735	0.253233	-8.04536	8.5995e-16	3.13042e-14	down	?
Lus10006009.g.BGIv1.0	8444	-2.04337	0.0288628	-70.7959	0	0	down	K12309 - beta-galactosidase (GLB1, ELNR1) (1 of 5)
Lus10010883.g.BGIv1.0	966.83	-2.04608	0.080449	-25.4332	1.08234e-142	8.90823e-140	down	?
Lus10000955.g.BGIv1.0	7.59264	-2.05212	0.798418	-2.57023	0.010163	0.0416042	down	PTHR12772 - DNA REPLICATION COMPLEX GINS PROTEIN PSF2 (1 of 2)
Lus10042829.g.BGIv1.0	20.266	-2.05941	0.475448	-4.33151	1.48093e-05	0.000142376	down	PTHR10543//PTHR10543:SF30 - BETA-CAROTENE DIOXYGENASE // SUBFAMILY NOT NAMED (1 of 3)
Lus10038153.g.BGIv1.0	103.842	-2.05966	0.225023	-9.1531	5.53236e-20	2.79894e-18	down	PF00069//PF00560//PF11721 - Protein kinase domain (Pkinase) // Leucine Rich Repeat (LRR_1) // Di-glucose binding within endoplasmic reticulum (Malectin) (1 of 1)
Lus10016061.g.BGIv1.0	31.7677	-2.07501	0.403874	-5.13777	2.78019e-07	3.76778e-06	down	PTHR22814:SF106 - HEAVY-METAL-ASSOCIATED DOMAIN-CONTAINING PROTEIN (1 of 9)
Lus10022392.g.BGIv1.0	807.624	-2.08639	0.0798777	-26.1198	2.1738e-150	2.03763e-147	down	PTHR10992//PTHR10992:SF699 - ALPHA/BETA HYDROLASE FOLD-CONTAINING PROTEIN // SUBFAMILY NOT NAMED (1 of 2)
Lus10006105.g.BGIv1.0	180.417	-2.08686	0.166087	-12.5648	3.29564e-36	3.71944e-34	down	PTHR11732//PTHR11732:SF226 - ALDO/KETO REDUCTASE // SUBFAMILY NOT NAMED (1 of 8)
Lus10022617.g.BGIv1.0	41.8623	-2.09987	0.33382	-6.29041	3.16631e-10	6.58737e-09	down	PTHR22814:SF113 - HEAVY-METAL-ASSOCIATED DOMAIN-CONTAINING PROTEIN-RELATED (1 of 5)
Lus10025380.g.BGIv1.0	23.6897	-2.10285	0.468733	-4.48624	7.24909e-06	7.44886e-05	down	PTHR12549:SF16 - HISTONE H3MK9 DEMETHYLASE (1 of 9)
Lus10024097.g.BGIv1.0	257.698	-2.10937	0.138406	-15.2404	1.90624e-52	3.61383e-50	down	?
Lus10032242.g.BGIv1.0	84.1923	-2.11642	0.234274	-9.03395	1.65591e-19	8.01702e-18	down	PTHR31953:SF17 - ACID BETA-FRUCTOFURANOSIDASE 3, VACUOLAR-RELATED (1 of 6)
Lus10033927.g.BGIv1.0	191.661	-2.12364	0.165848	-12.8047	1.54256e-37	1.82645e-35	down	PTHR10992//PTHR10992:SF866 - ALPHA/BETA HYDROLASE FOLD-CONTAINING PROTEIN // SUBFAMILY NOT NAMED (1 of 2)
Lus10007704.g.BGIv1.0	8.89093	-2.1405	0.75841	-2.82235	0.00476724	0.0224429	down	?
Lus10008251.g.BGIv1.0	41.1918	-2.14139	0.340948	-6.28069	3.3708e-10	6.95704e-09	down	PTHR10046//PTHR10046:SF51 - ATP DEPENDENT LON PROTEASE FAMILY MEMBER // SUBFAMILY NOT NAMED (1 of 1)
Lus10019171.g.BGIv1.0	20.5537	-2.17316	0.491302	-4.42326	9.72209e-06	9.72641e-05	down	PF07058 - Microtubule-associated protein 70 (MAP70) (1 of 7)
Lus10025092.g.BGIv1.0	289.967	-2.18398	0.130015	-16.798	2.52616e-63	6.45796e-61	down	PF00924//PF01842//PF07714 - Mechanosensitive ion channel (MS_channel) // ACT domain (ACT) // Protein tyrosine kinase (Pkinase_Tyr) (1 of 1)
Lus10035912.g.BGIv1.0	216.167	-2.18968	0.15031	-14.5677	4.50735e-48	7.64325e-46	down	PTHR24006:SF451 - UBIQUITIN CARBOXYL-TERMINAL HYDROLASE (1 of 4)
Lus10008791.g.BGIv1.0	9.0961	-2.19249	0.716954	-3.05805	0.00222779	0.0118426	down	?
Lus10008742.g.BGIv1.0	733.194	-2.19478	0.0857283	-25.6015	1.46679e-144	1.23742e-141	down	K13691 - pathogen-inducible salicylic acid glucosyltransferase [EC:2.4.1.-] Glc b1-2 SA (SGT1) (1 of 4)
Lus10000859.g.BGIv1.0	7.26395	-2.20282	0.830969	-2.6509	0.00802772	0.0343732	down	?
Lus10040131.g.BGIv1.0	1344.62	-2.22373	0.0641556	-34.6615	2.99272e-263	7.21353e-260	down	K01338 - ATP-dependent Lon protease (lon) (1 of 3)
Lus10017486.g.BGIv1.0	15.2658	-2.24767	0.566643	-3.96664	7.28924e-05	0.000597899	down	PTHR22953//PTHR22953:SF39 - ACID PHOSPHATASE RELATED // SUBFAMILY NOT NAMED (1 of 1)
Lus10015047.g.BGIv1.0	69.8102	-2.25146	0.273202	-8.24101	1.70765e-16	6.48198e-15	down	PTHR13832:SF367 - PROTEIN PHOSPHATASE 2C 67-RELATED (1 of 4)
Lus10010603.g.BGIv1.0	8.43383	-2.26089	0.767104	-2.94731	0.00320554	0.0161353	down	?
Lus10025751.g.BGIv1.0	1168.59	-2.26352	0.0701197	-32.2808	1.30124e-228	2.74439e-225	down	PTHR24006:SF451 - UBIQUITIN CARBOXYL-TERMINAL HYDROLASE (1 of 4)
Lus10005785.g.BGIv1.0	12.3828	-2.28932	0.641304	-3.56979	0.000357262	0.00243257	down	PF01535 - PPR repeat (PPR) (1 of 695)
Lus10039645.g.BGIv1.0	8.64818	-2.29414	0.816299	-2.81042	0.00494775	0.023157	down	PTHR11010:SF38 - LYSOSOMAL PRO-X CARBOXYPEPTIDASE (1 of 2)
Lus10040113.g.BGIv1.0	7.84063	-2.3141	0.784079	-2.95136	0.00316374	0.0159654	down	KOG4652 - HORMA domain (1 of 2)
Lus10019534.g.BGIv1.0	12.6883	-2.31472	0.654923	-3.53434	0.00040879	0.00273323	down	PTHR24296:SF7 - CYTOCHROME P450 94C1 (1 of 2)
Lus10025166.g.BGIv1.0	23.5536	-2.3151	0.490672	-4.71822	2.37916e-06	2.72244e-05	down	PTHR31651:SF5 - AUXIN EFFLUX CARRIER FAMILY PROTEIN-RELATED (1 of 5)
Lus10042281.g.BGIv1.0	731.553	-2.32302	0.0832242	-27.9128	1.86514e-171	2.24782e-168	down	K01953 - asparagine synthase (glutamine-hydrolysing) (asnB, ASNS) (1 of 4)
Lus10000126.g.BGIv1.0	61.3114	-2.33139	0.722173	-3.22829	0.00124532	0.0072292	down	PTHR11048:SF18 - CHLOROPHYLL SYNTHASE, CHLOROPLASTIC (1 of 4)
Lus10018473.g.BGIv1.0	6.9361	-2.34627	0.835727	-2.80746	0.00499337	0.0233446	down	?
Lus10034740.g.BGIv1.0	38.3757	-2.35188	0.371889	-6.32415	2.5463e-10	5.3703e-09	down	?
Lus10015221.g.BGIv1.0	36.7105	-2.36493	0.375947	-6.2906	3.16249e-10	6.58347e-09	down	PTHR12542//PTHR12542:SF17 - EXOCYST COMPLEX PROTEIN EXO70 // SUBFAMILY NOT NAMED (1 of 5)
Lus10029336.g.BGIv1.0	114.944	-2.38377	0.220514	-10.81	3.08552e-27	2.36102e-25	down	1.2.1.42 - Hexadecanal dehydrogenase (acylating) / Fatty acyl-CoA reductase (1 of 5)
Lus10033279.g.BGIv1.0	12.3253	-2.38929	0.634169	-3.76759	0.000164829	0.00123466	down	PF02365 - No apical meristem (NAM) protein (NAM) (1 of 189)
Lus10040771.g.BGIv1.0	7.18518	-2.39533	0.857846	-2.79226	0.00523418	0.0242387	down	PTHR23500:SF159 - D-XYLOSE-PROTON SYMPORTER-LIKE 3, CHLOROPLASTIC (1 of 3)
Lus10000717.g.BGIv1.0	6.23615	-2.39583	0.928931	-2.57913	0.00990492	0.0407165	down	PTHR10192 - MOLYBDOPTERIN BIOSYNTHESIS PROTEIN (1 of 2)
Lus10025232.g.BGIv1.0	129.339	-2.40575	0.197468	-12.183	3.82972e-34	4.02597e-32	down	PF00046 - Homeobox domain (Homeobox) (1 of 102)
Lus10025345.g.BGIv1.0	18.8295	-2.43634	0.533794	-4.56419	5.01436e-06	5.38199e-05	down	?
Lus10029584.g.BGIv1.0	10.8618	-2.44356	0.719873	-3.39443	0.000687704	0.00431911	down	PTHR31764:SF0 - PROTEIN HAPLESS 2 (1 of 2)
Lus10017095.g.BGIv1.0	1846.08	-2.45586	0.0578155	-42.4775	0	0	down	PF12899 - Alkaline and neutral invertase (Glyco_hydro_100) (1 of 14)
Lus10037817.g.BGIv1.0	1832.98	-2.46896	0.0575991	-42.8646	0	0	down	PF12899 - Alkaline and neutral invertase (Glyco_hydro_100) (1 of 14)
Lus10019270.g.BGIv1.0	23.9209	-2.48479	0.478713	-5.19056	2.09665e-07	2.90203e-06	down	PF05678 - VQ motif (VQ) (1 of 42)
Lus10038193.g.BGIv1.0	8.7984	-2.50705	0.77271	-3.24449	0.00117662	0.00688007	down	PF02519 - Auxin responsive protein (Auxin_inducible) (1 of 133)
Lus10008756.g.BGIv1.0	25.1505	-2.54962	0.473899	-5.38009	7.44497e-08	1.10286e-06	down	PTHR21262//PTHR21262:SF7 - GUANOSINE-3',5'-BIS DIPHOSPHATE 3'-PYROPHOSPHOHYDROLASE // SUBFAMILY NOT NAMED (1 of 3)
Lus10008755.g.BGIv1.0	5.75096	-2.55445	1.0153	-2.51596	0.0118708	0.0471381	down	PTHR21262//PTHR21262:SF7 - GUANOSINE-3',5'-BIS DIPHOSPHATE 3'-PYROPHOSPHOHYDROLASE // SUBFAMILY NOT NAMED (1 of 3)
Lus10003777.g.BGIv1.0	9.35997	-2.56194	0.792961	-3.23086	0.0012342	0.00717207	down	PTHR22884:SF285 - HISTONE-LYSINE N-METHYLTRANSFERASE ASHR3 (1 of 2)
Lus10040928.g.BGIv1.0	8.24534	-2.59556	0.846334	-3.06683	0.00216341	0.0115586	down	PTHR10491 - DTDP-4-DEHYDRORHAMNOSE REDUCTASE (1 of 3)
Lus10035229.g.BGIv1.0	10.7415	-2.61652	0.746053	-3.50715	0.000452936	0.00298814	down	PF05212 - Protein of unknown function (DUF707) (DUF707) (1 of 23)
Lus10023303.g.BGIv1.0	10.4411	-2.6418	0.763148	-3.46171	0.000536763	0.00347406	down	PTHR33077:SF17 - PROTEIN TIFY 5A-RELATED (1 of 2)
Lus10027053.g.BGIv1.0	8.43573	-2.69143	0.823474	-3.26838	0.00108165	0.00641029	down	?
Lus10011555.g.BGIv1.0	16.8601	-2.78161	0.570133	-4.87888	1.06691e-06	1.30022e-05	down	PF05678 - VQ motif (VQ) (1 of 42)
Lus10017028.g.BGIv1.0	5.44075	-2.8529	1.04231	-2.7371	0.00619831	0.0277846	down	KOG0472 - Leucine-rich repeat protein (1 of 77)
Lus10006808.g.BGIv1.0	8.12054	-2.85482	0.82505	-3.46018	0.000539824	0.00349106	down	PF11805 - Protein of unknown function (DUF3326) (DUF3326) (1 of 3)
Lus10010713.g.BGIv1.0	5.79668	-2.95575	1.02667	-2.87897	0.00398976	0.0193385	down	PF02519 - Auxin responsive protein (Auxin_inducible) (1 of 133)
Lus10040557.g.BGIv1.0	6893.31	-2.95663	0.0371779	-79.5266	0	0	down	PTHR23421:SF74 - BETA-GALACTOSIDASE 1 (1 of 8)
Lus10008261.g.BGIv1.0	4.37848	-2.95764	1.16785	-2.53256	0.0113232	0.0453749	down	2.8.4.5 - tRNA (N(6)-L-threonylcarbamoyladenosine(37)-C(2))-methylthiotransferase / Methylthio-threonylcarbamoyl-adenosine transferase B (1 of 3)
Lus10030315.g.BGIv1.0	24.7281	-2.97376	0.508123	-5.85243	4.84432e-09	8.54649e-08	down	PTHR11802//PTHR11802:SF94 - SERINE PROTEASE FAMILY S10 SERINE CARBOXYPEPTIDASE // SUBFAMILY NOT NAMED (1 of 20)
Lus10031175.g.BGIv1.0	13.2143	-2.99823	0.666422	-4.499	6.82743e-06	7.07784e-05	down	PTHR23324:SF48 - PATELLIN-3-RELATED (1 of 9)
Lus10006809.g.BGIv1.0	7.49392	-3.0027	0.901809	-3.32965	0.000869564	0.00529187	down	PF11805 - Protein of unknown function (DUF3326) (DUF3326) (1 of 3)
Lus10012415.g.BGIv1.0	4.80934	-3.07521	1.18587	-2.59321	0.00950849	0.039394	down	PTHR34457:SF1 - EMBRYO DEFECTIVE 2410 PROTEIN (1 of 5)
Lus10040168.g.BGIv1.0	4.70118	-3.13428	1.2137	-2.58241	0.00981132	0.0404253	down	?
Lus10008674.g.BGIv1.0	10.091	-3.17538	0.814693	-3.89764	9.71353e-05	0.000772876	down	?
Lus10000242.g.BGIv1.0	23.6168	-3.19892	0.531348	-6.02038	1.74008e-09	3.29328e-08	down	PF00106 - short chain dehydrogenase (adh_short) (1 of 81)
Lus10009375.g.BGIv1.0	5.08908	-3.22667	1.15928	-2.78334	0.00538021	0.0247519	down	?
Lus10029972.g.BGIv1.0	5.18426	-3.2359	1.14401	-2.82857	0.00467561	0.0221177	down	PF00083 - Sugar (and other) transporter (Sugar_tr) (1 of 75)
Lus10040214.g.BGIv1.0	5.7557	-3.39654	1.09746	-3.0949	0.00196881	0.010671	down	K02941 - large subunit ribosomal protein LP0 (RP-LP0, RPLP0) (1 of 5)
Lus10029256.g.BGIv1.0	3.87304	-3.42575	1.33604	-2.56411	0.0103442	0.0421728	down	?
Lus10022343.g.BGIv1.0	37.3401	-3.45385	0.440737	-7.83653	4.63157e-15	1.59157e-13	down	PTHR10891//PTHR10891:SF621 - EF-HAND CALCIUM-BINDING DOMAIN CONTAINING PROTEIN // SUBFAMILY NOT NAMED (1 of 2)
Lus10011958.g.BGIv1.0	11.3928	-3.68737	0.816393	-4.51666	6.28212e-06	6.5591e-05	down	1.14.13.89 - Isoflavone 2'-hydroxylase / Isoflavone 2'-monooxygenase (1 of 14)
Lus10018340.g.BGIv1.0	6.97546	-3.72829	1.07095	-3.4813	0.000498992	0.00325067	down	PTHR21495:SF59 - DIRIGENT PROTEIN 20-RELATED (1 of 5)
Lus10003939.g.BGIv1.0	11.9404	-3.78548	0.844058	-4.48485	7.29649e-06	7.49529e-05	down	PF04570 - zinc-finger of the FCS-type, C2-C2 (zf-FLZ) (1 of 18)
Lus10008935.g.BGIv1.0	581.662	-3.86027	0.120236	-32.1056	3.67712e-226	7.29909e-223	down	1.14.13.152 - Geraniol 8-hydroxylase / G10H (1 of 16)
Lus10027504.g.BGIv1.0	2.86571	-3.93314	1.54624	-2.54367	0.0109693	0.0443411	down	PTHR11206:SF152 - MATE EFFLUX FAMILY PROTEIN (1 of 3)
Lus10040419.g.BGIv1.0	2.8819	-3.93996	1.57588	-2.50017	0.0124134	0.0489529	down	PTHR11177//PTHR11177:SF158 - CHITINASE // SUBFAMILY NOT NAMED (1 of 10)
Lus10029750.g.BGIv1.0	2.91836	-3.96838	1.56705	-2.53239	0.0113287	0.0453913	down	PTHR13016 - AMMECR1 HOMOLOG (1 of 4)
Lus10008536.g.BGIv1.0	30.3557	-3.98193	0.53418	-7.45429	9.03499e-14	2.75665e-12	down	1.10.3.1 - Catechol oxidase / Tyrosinase (1 of 7)
Lus10002365.g.BGIv1.0	13.0798	-4.21762	0.878145	-4.80288	1.56401e-06	1.85314e-05	down	PTHR11206:SF115 - MATE EFFLUX FAMILY PROTEIN (1 of 7)
Lus10010882.g.BGIv1.0	3.52009	-4.25678	1.5303	-2.78167	0.00540804	0.0248494	down	?
Lus10004981.g.BGIv1.0	3.66876	-4.30754	1.47021	-2.92987	0.00339106	0.0169077	down	PTHR12694 - TRANSCRIPTION INITIATION FACTOR IIA SUBUNIT 1 (1 of 4)
Lus10013431.g.BGIv1.0	2.26665	-4.64965	1.6585	-2.80354	0.00505455	0.0235751	down	?
Lus10026398.g.BGIv1.0	4.65296	-4.66929	1.44737	-3.22604	0.00125516	0.00727604	down	PTHR32468:SF29 - CATION/H(+) ANTIPORTER 24-RELATED (1 of 4)
Lus10003958.g.BGIv1.0	2.46044	-4.76417	1.61129	-2.95674	0.00310911	0.0157367	down	?
Lus10022863.g.BGIv1.0	2.47998	-4.77336	1.60467	-2.97466	0.00293311	0.0149853	down	2.7.11.1 - Non-specific serine/threonine protein kinase / Threonine-specific protein kinase (1 of 1714)
Lus10035918.g.BGIv1.0	2.53096	-4.79677	1.60181	-2.9946	0.00274806	0.0141599	down	PTHR19139//PTHR19139:SF145 - AQUAPORIN TRANSPORTER // SUBFAMILY NOT NAMED (1 of 4)
Lus10026233.g.BGIv1.0	2.78336	-4.92704	1.63275	-3.01763	0.00254759	0.0132749	down	PTHR10217:SF544 - CYCLIC NUCLEOTIDE-GATED ION CHANNEL 14-RELATED (1 of 8)
Lus10039453.g.BGIv1.0	2.82932	-4.97621	1.61795	-3.07562	0.00210066	0.0112895	down	?
Lus10005324.g.BGIv1.0	2.87602	-4.99587	1.61247	-3.09827	0.00194653	0.0105689	down	PTHR10374:SF10 - EXPRESSED PROTEIN (1 of 2)
Lus10012278.g.BGIv1.0	3.38175	-5.21406	1.52874	-3.4107	0.000647975	0.00410383	down	PTHR31509:SF6 - F5M15.16 (1 of 2)
