# Supplementary figures and images for: Transcriptome profiling of flax plants exposed to a low-frequency alternating electromagnetic field
Source: Frontiers journal article supplement (doi:10.3389/fgene.2023.1205469), 2023-06-07

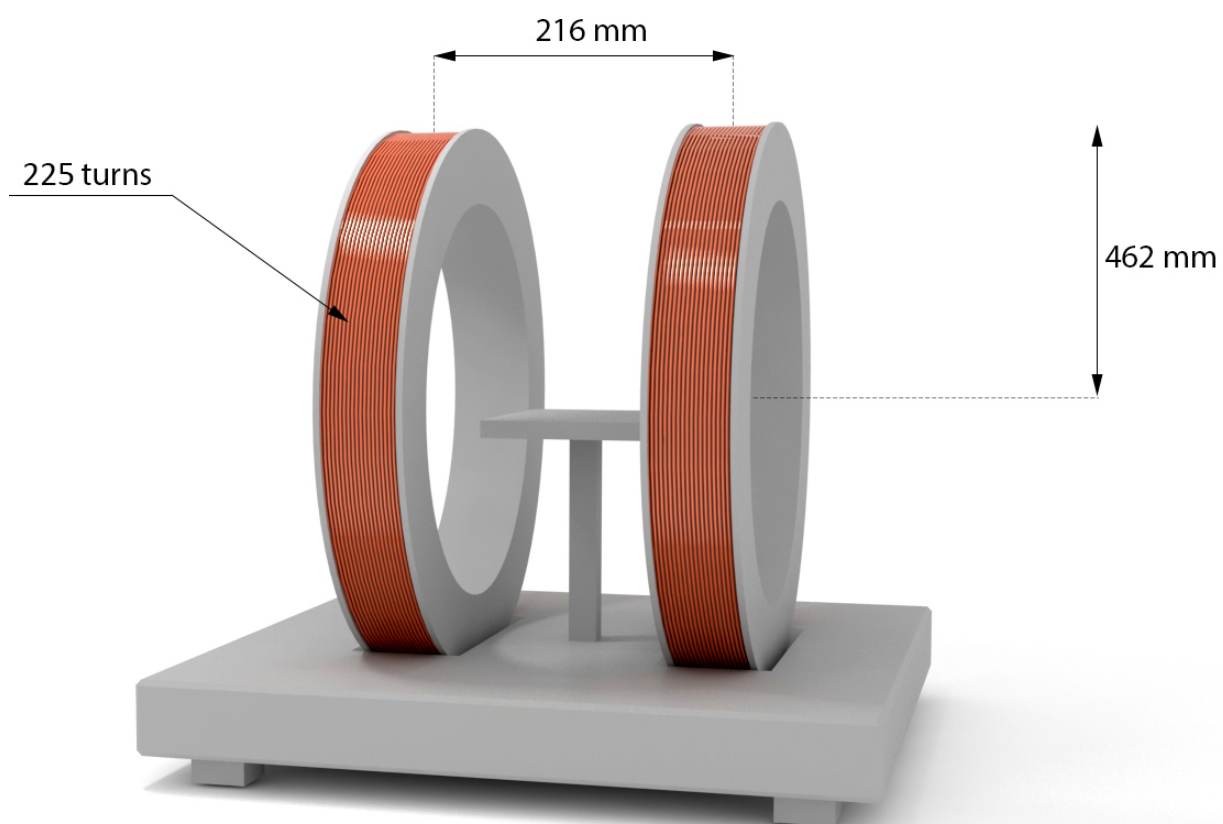

Supplementary Fig S2. Scheme of the ELF-EMF exposure system.

Supplement: Data_Sheet_1.zip [file Data_Sheet_1.zip]
